# Supplementary material for: Catalyzed chain growth polymerisation of ethylene using lanthanidocenes/dialkylmagnesium: further developments and one pot synthesis of narrow dispersed high molecular weight fatty alcohols
Source: Royal Society of Chemistry journal article supplement (doi:10.1039/d0cy01451f), 2020-01-01
Supplement: d0cy01451f1.pdf [file d0cy01451f1.pdf]

## Supplementary Information

### Catalyzed Chain Growth Polymerisation of Ethylene using lanthanidocenes/dialkylmagnesium: Further developments and one pot synthesis of narrow dispersed high molecular weight fatty alcohols

T. Chenal, M. Drelon, B. Marsh, F. F. Silva, M. Visseaux and A. Mortreux

#### Overview<sup>1</sup>

- S1 Shapes of the reactors used in the study. Pages 2 – 3
- S2 Detailed results of each experiment presented in **Table 1**: CCG polymerisation of ethylene on various  $\text{Cp}^{\text{R}}\text{H}/\text{Nd}(\text{BH}_4)_3(\text{THF})_3/\text{MgR}_2$  (2/1/50), 1.1 bar ethylene. Pages 4 – 22
- S3 Detailed conditions and results of each experiment presented in **Table 2**: improvement of the reaction rate upon using different ether additives on the CCG of ethylene on butyl-ethyl-magnesium using  $\text{Cp}^*_2\text{NdCl}_2\text{Li}(\text{OEt}_2)_2$  as catalytic precursor. Pages 23 – 25
- S4 Detailed conditions and results (GC,  $^{13}\text{C}$  and  $^1\text{H}$  NMR) of each experiment presented in **Tables 3 and 4**: one pot synthesis of narrow dispersed high molecular weight fatty alcohols. Pages 26 – 68
- S5 GC-MS and IR analyses for aldehyde determination in fatty alcohols. Pages 69 – 77

---

<sup>1</sup> The reader must be aware that all experiments are not systematically duplicated due to the fact that their implementation requires significant preparation. Nevertheless, the validity of the results is considered to be correct insofar as experiments carried out with structurally similar ligands give similar (and thus reproducible) results (entries 1-3, Table 1 for example). In general, the large number of experiments carried out and the overall consistency of the results is to some extent a guarantee of the reliability of the experimental procedure used.

S1 Shapes of the reactors used in the study.

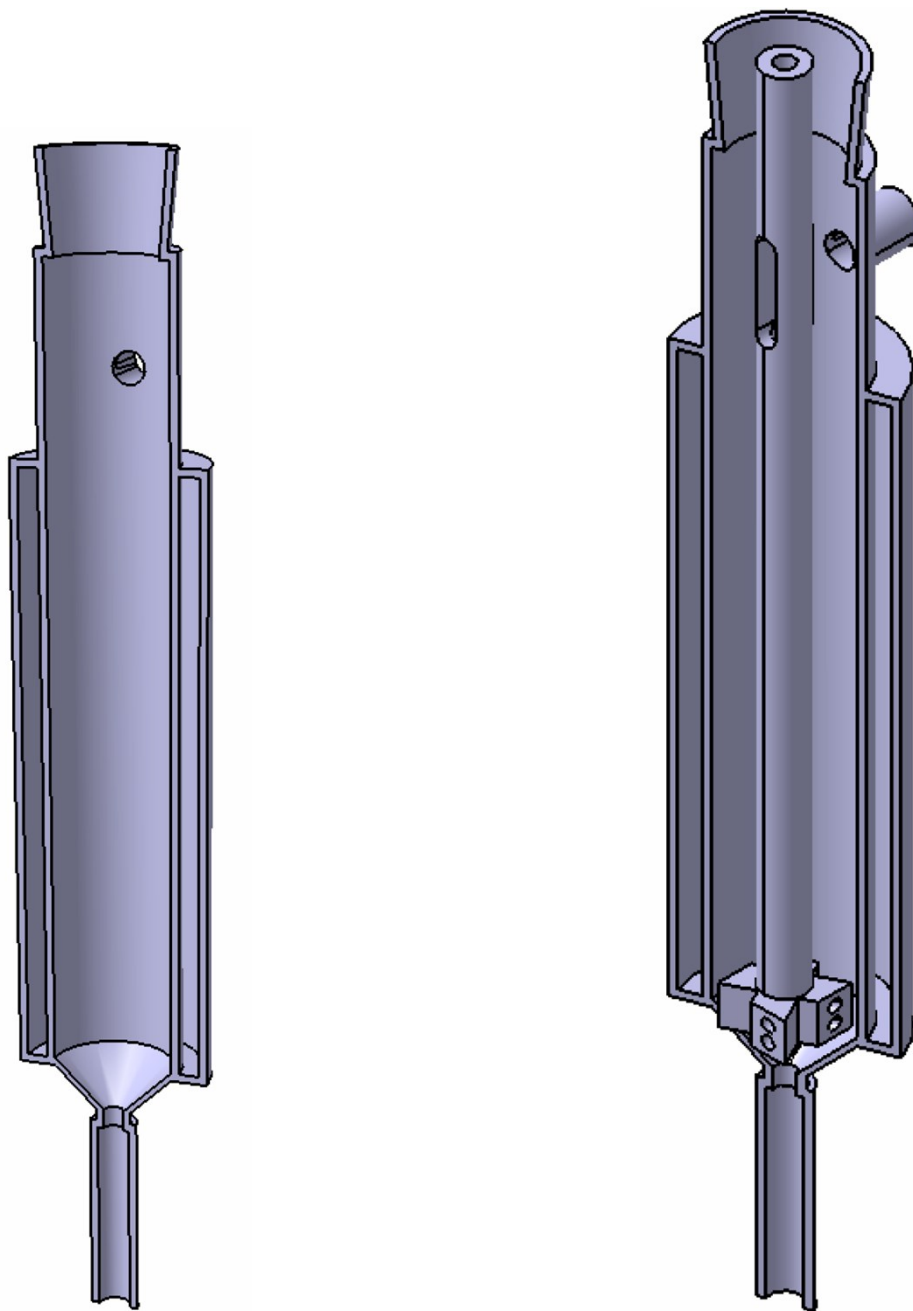

Cut view of naked glass main part

With stainless steel stirring impeller

Figure S1-1 Shape drawing of the small reactor (20 mL) homemade by the glass blower of the laboratory.

Scale: Inner diameter is 30 mm, stirring blade is 25 mm diameter and 10 mm height.

S1 continuing

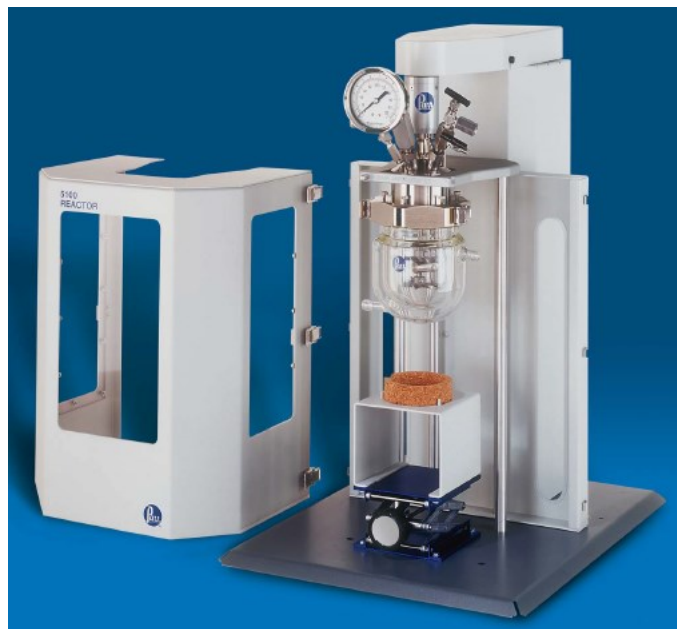

Figure S1-2 Shape photography of the batch reactor (total volume 600 mL) purchased from the Parr Company

Scale: Inner diameter is 50 mm, stirring blade is 27 mm diameter and 13 mm height.

S2 Results details of experiments in **Table 1**: CCG polymerisation of ethylene on various  $\text{Cp}^{\text{R}}\text{H}/\text{Nd}(\text{BH}_4)_3(\text{THF})_3/\text{MgR}_2$  (2/1/50), 1.1 bar ethylene, small reactor.

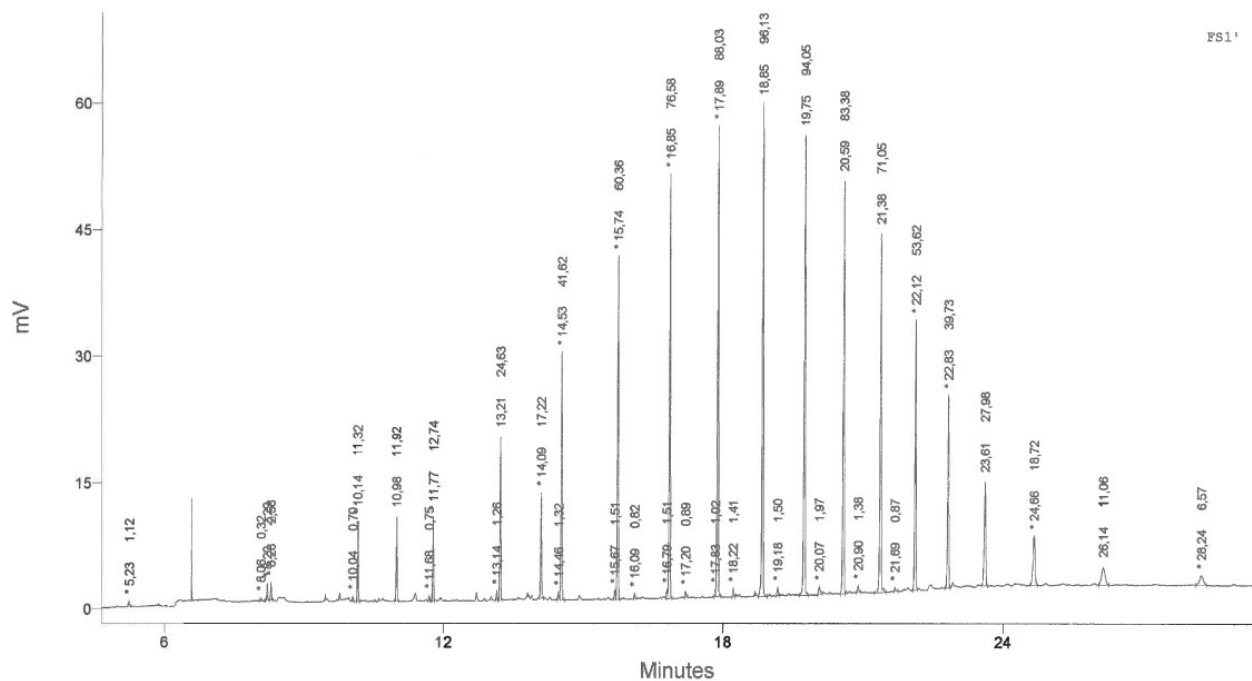

Figure S2-1a Raw signal Gas Chromatography analysis Entry 1 Table 1.

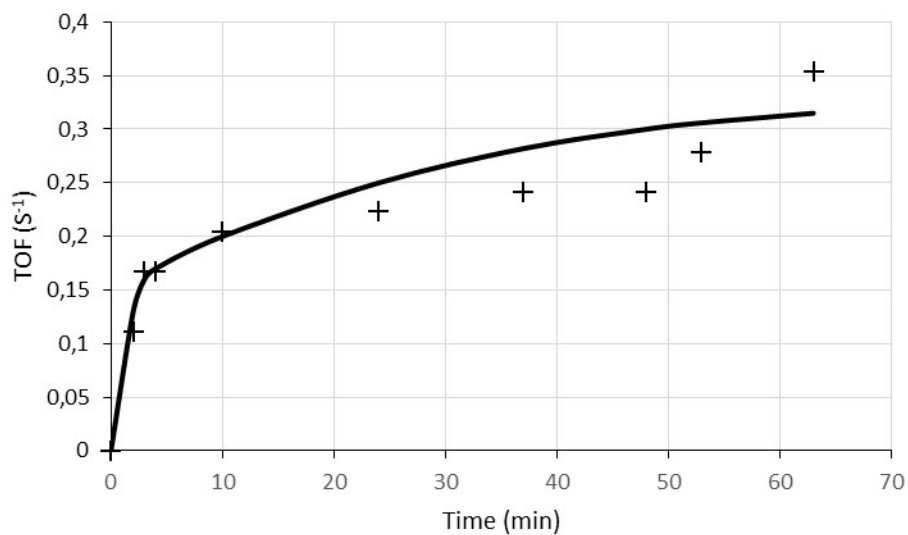

Figure S2-1b Kinetic measurement of ethylene consumption Entry 1 Table 1.



S2 continuing

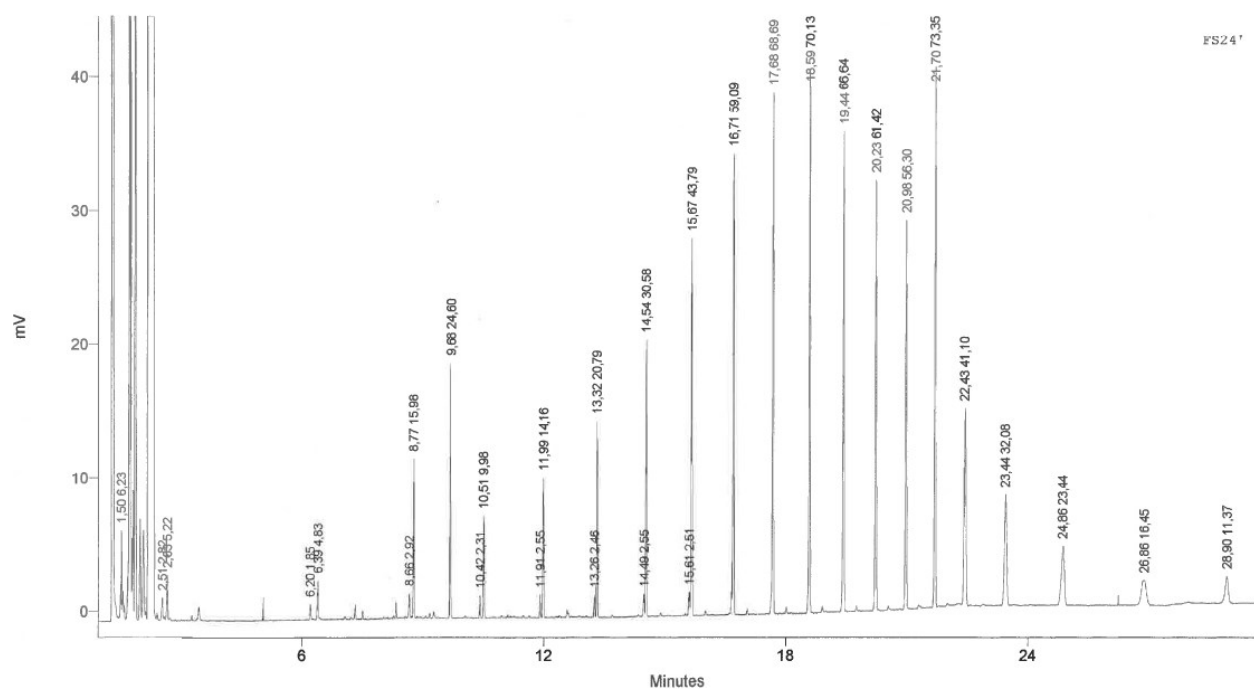

Figure S2-2a Raw signal Gas Chromatography analysis Entry 2 Table 1.

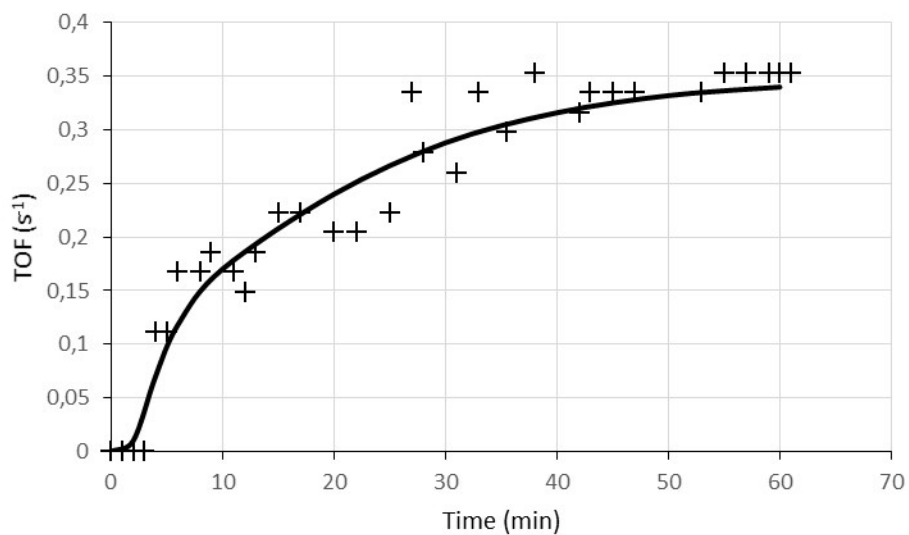

Figure S2-2b Kinetic measurement of ethylene consumption Entry 2 Table 1.

S2 continuing

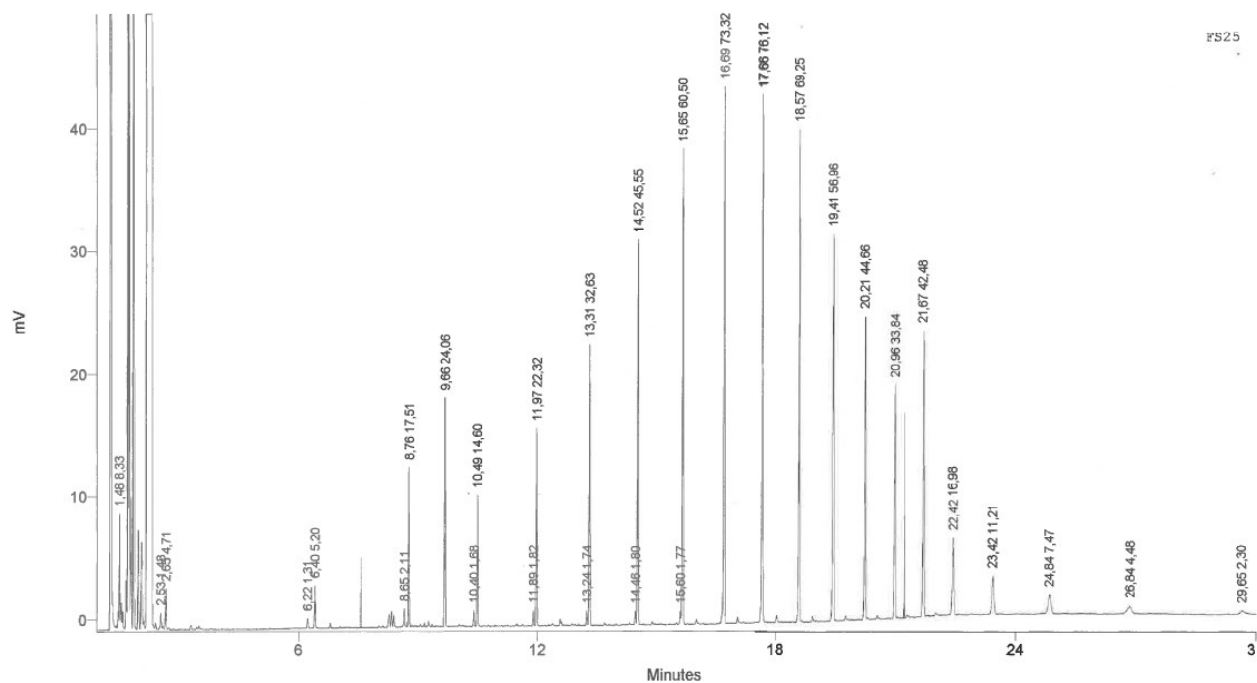

Figure S2-3a Raw signal Gas Chromatography analysis Entry 3 Table 1.

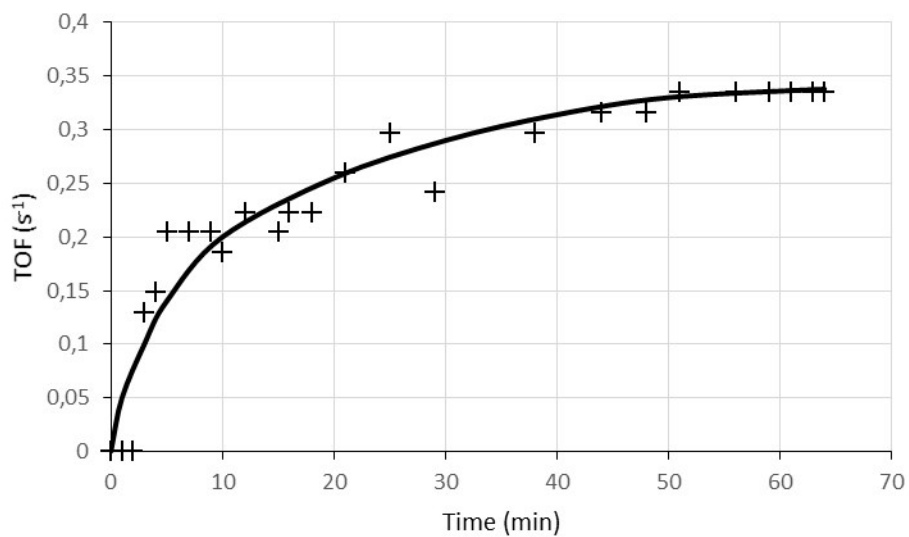

Figure S2-3b Kinetic measurement of ethylene consumption Entry 3 Table 1.

S2 continuing

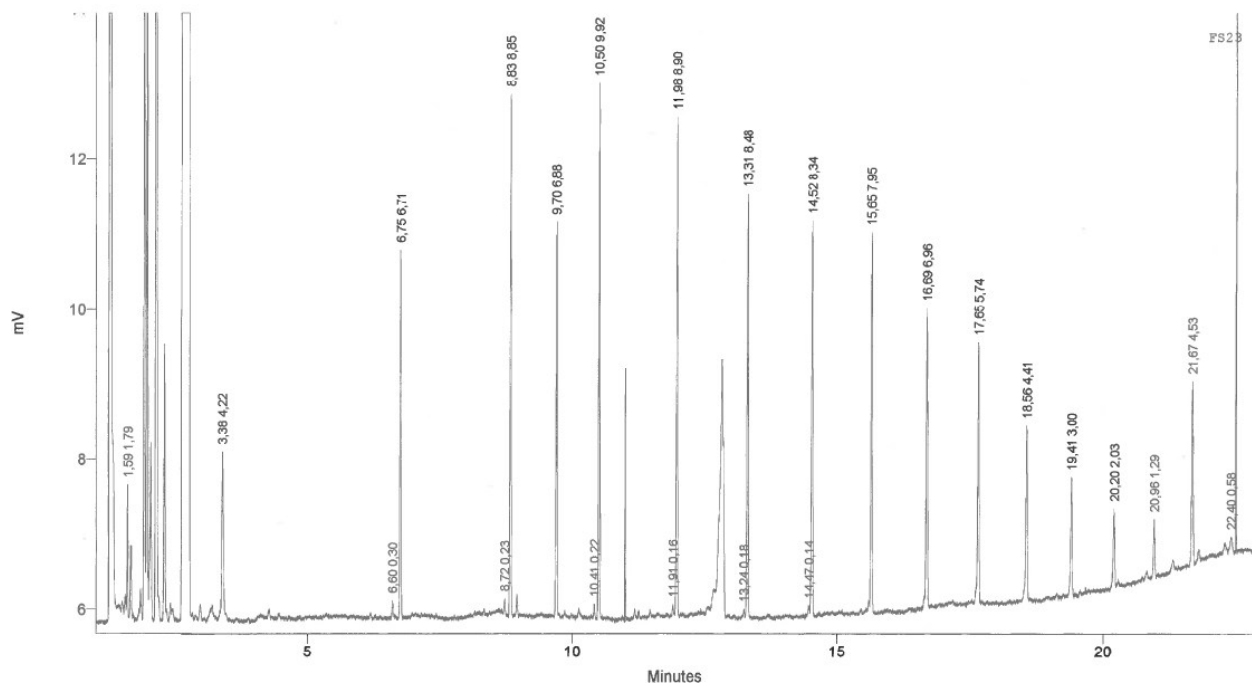

Figure S2-4a Raw signal Gas Chromatography analysis Entry 4 Table 1.

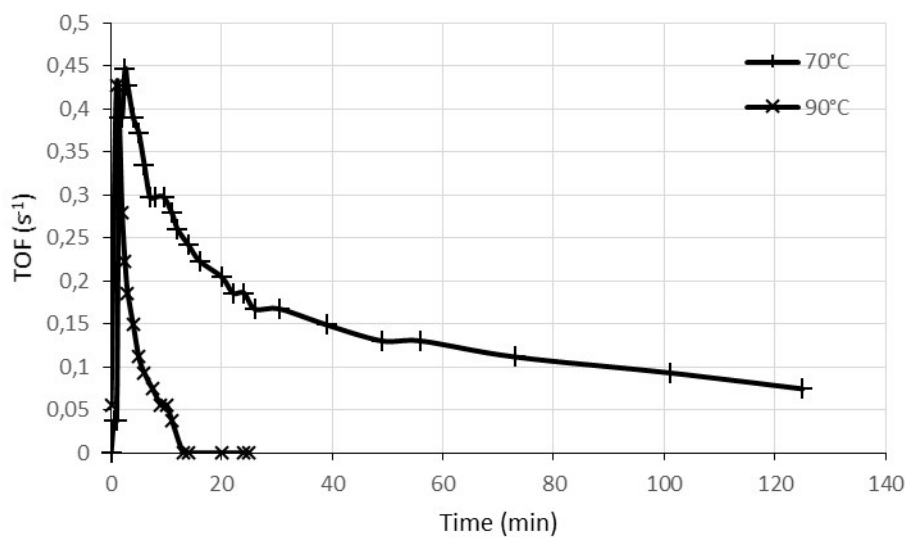

Figure S2-4b Kinetic measurement of ethylene consumption Entry 4 Table 1.

S2 continuing

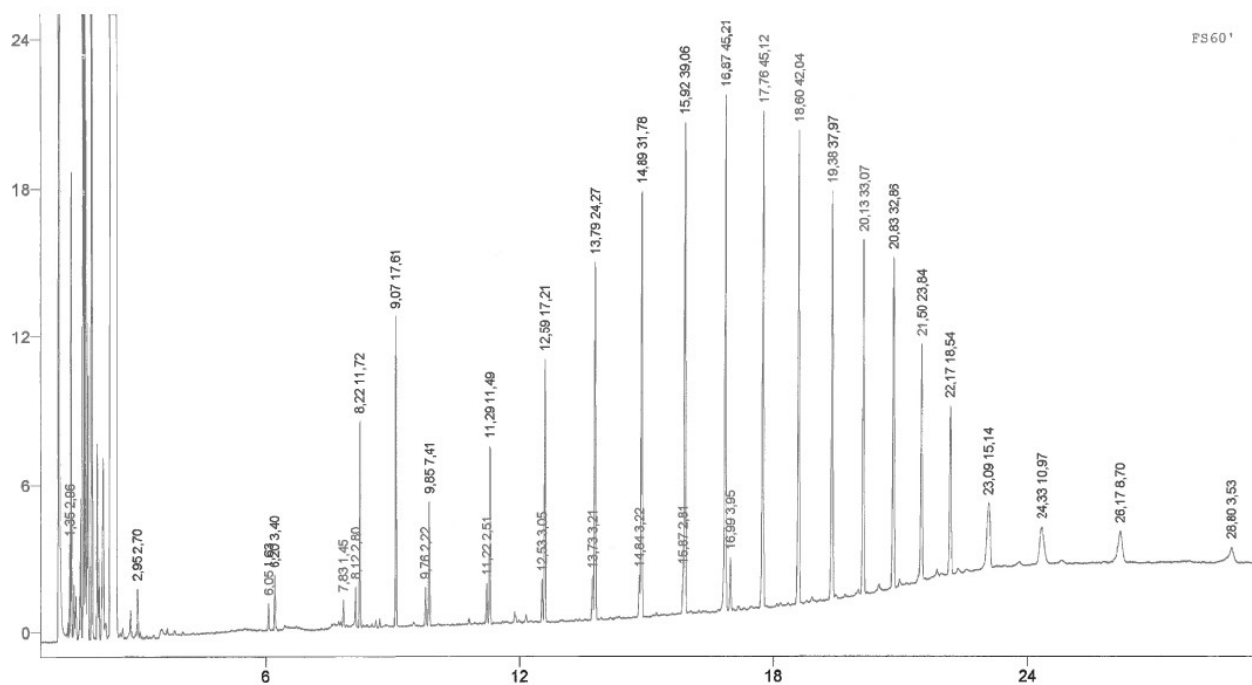

Figure S2-5a Raw signal Gas Chromatography analysis Entry 5 Table 1.

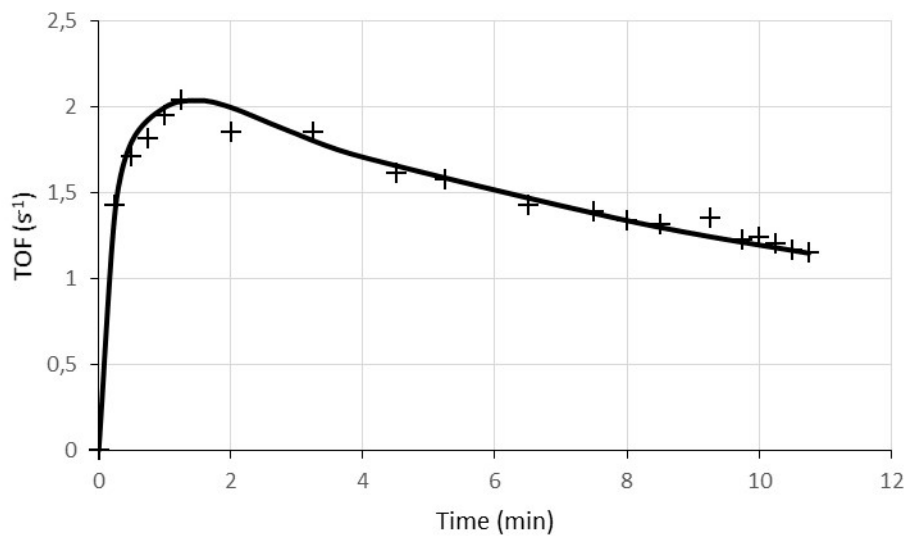

Figure S2-5b Kinetic measurement of ethylene consumption Entry 5 Table 1.

S2 continuing

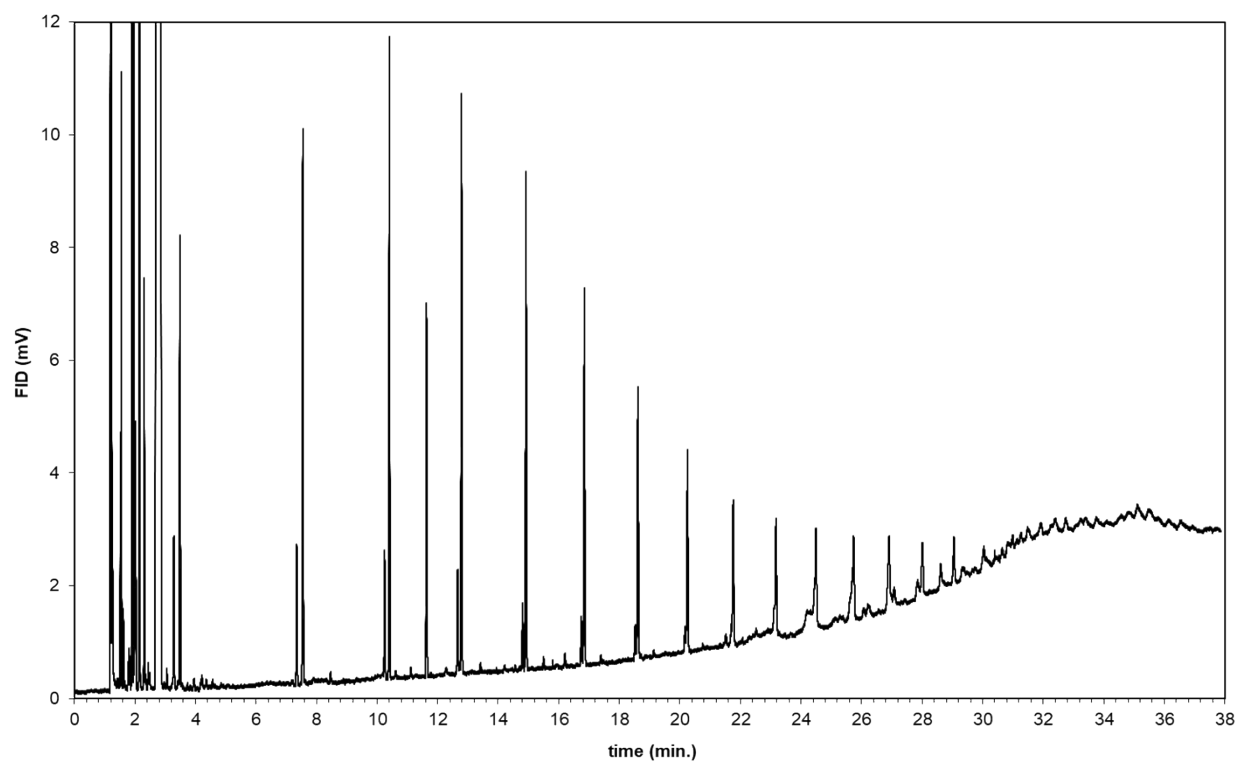

Figure S2-6a Raw signal Gas Chromatography analysis Entry 6 Table 1.

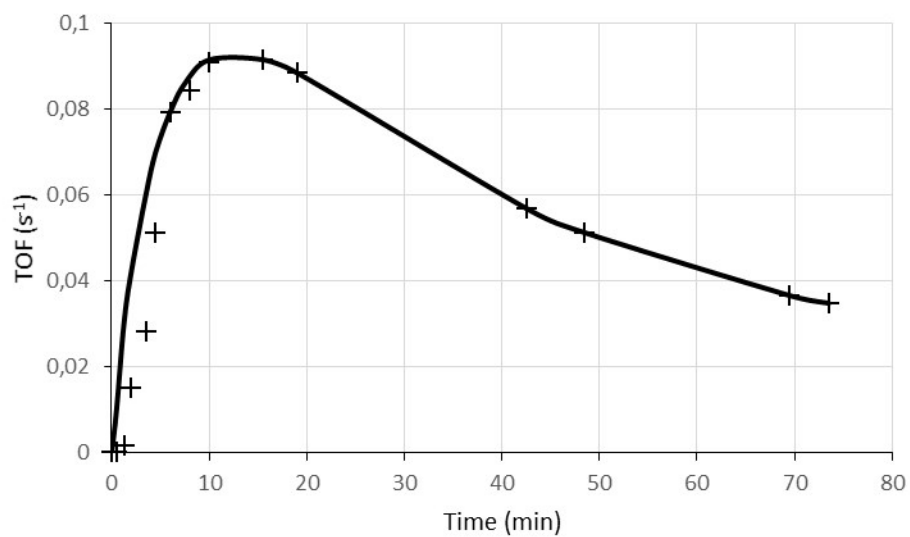

Figure S2-6b Kinetic measurement of ethylene consumption Entry 6 Table 1.

S2 continuing

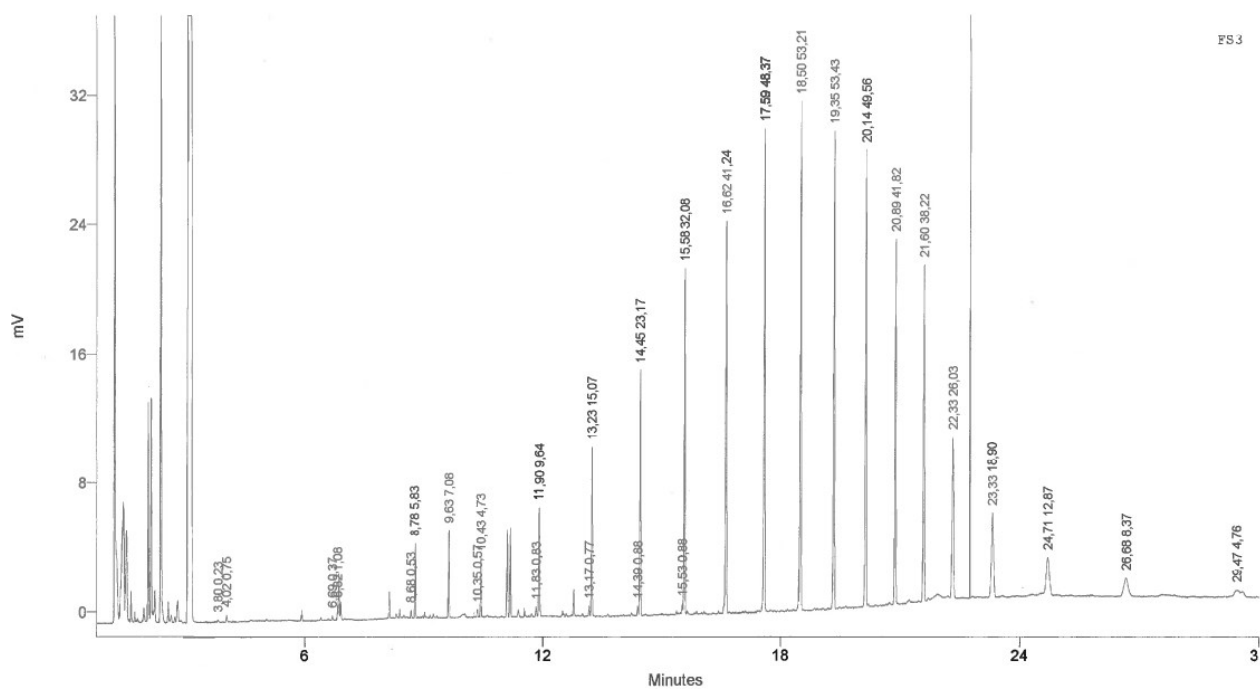

Figure S2-7a Raw signal Gas Chromatography analysis Entry 7 Table 1.

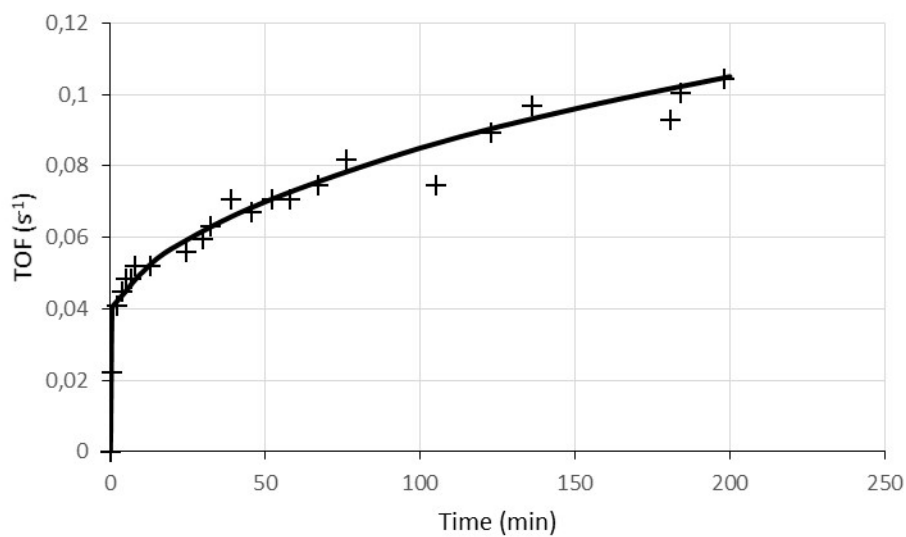

Figure S2-7b Kinetic measurement of ethylene consumption Entry 7 Table 1.

S2 continuing

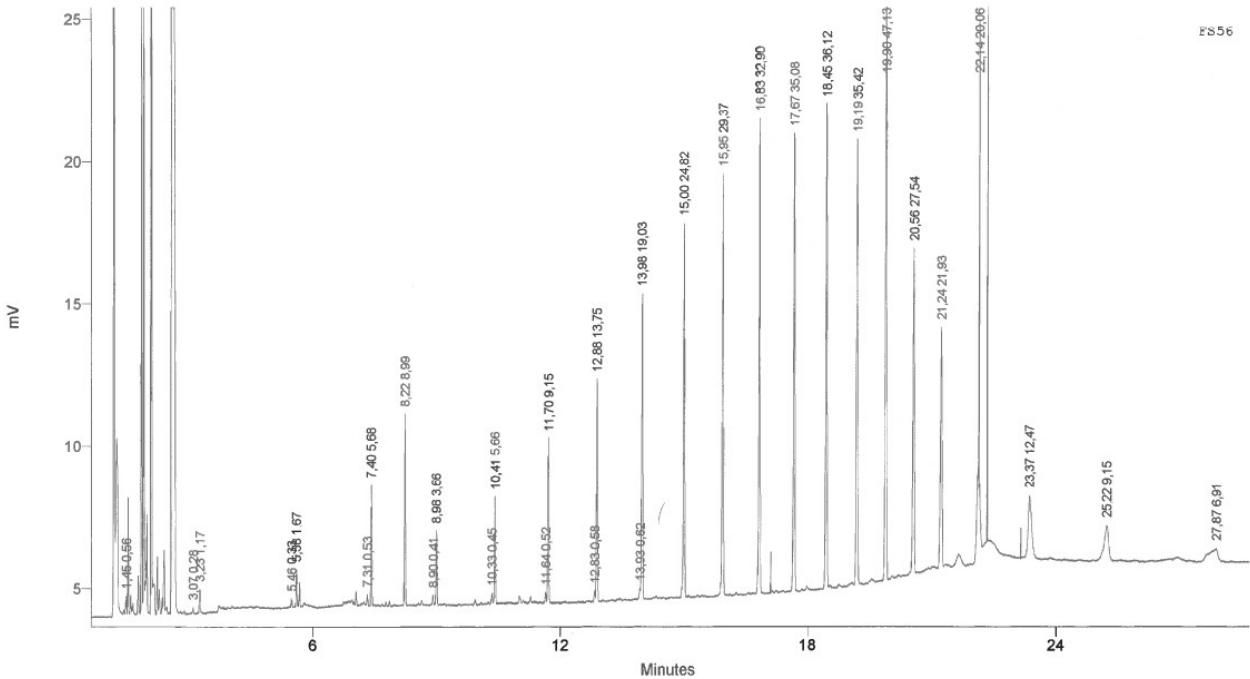

Figure S2-8a Raw signal Gas Chromatography analysis Entry 8 Table 1.

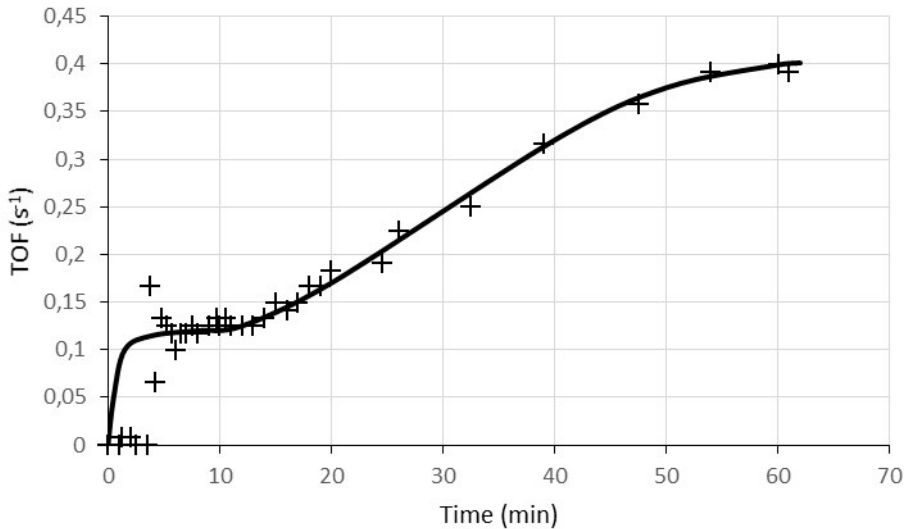

Figure S2-8b Kinetic measurement of ethylene consumption Entry 8 Table 1.

S2 continuing

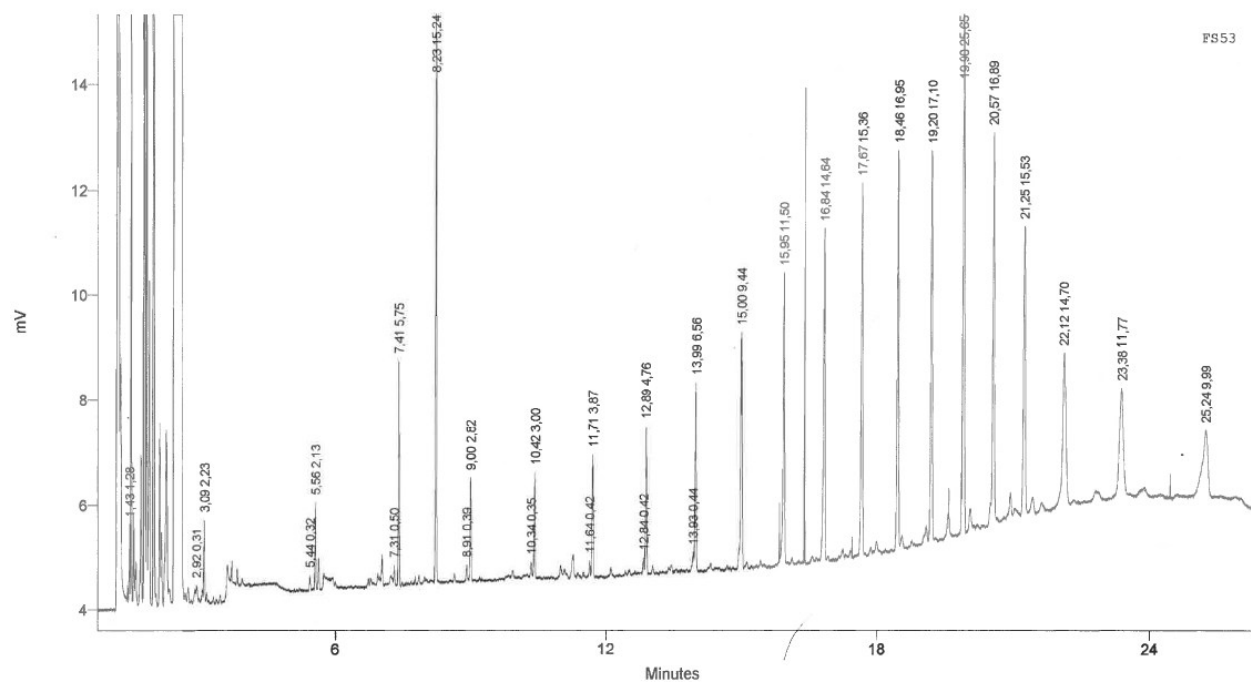

Figure S2-9a Raw signal Gas Chromatography analysis Entry 9 Table 1.

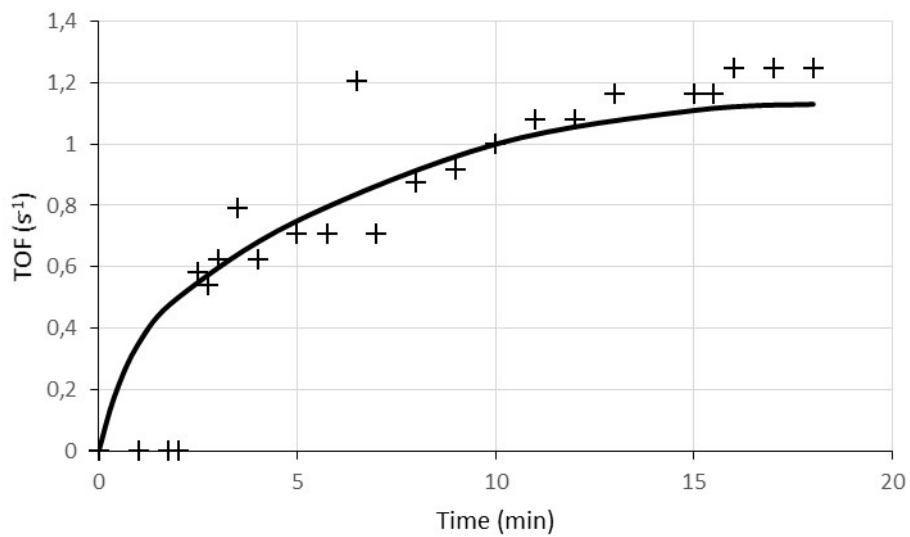

Figure S2-9b Kinetic measurement of ethylene consumption Entry 9 Table 1.



S2 continuing

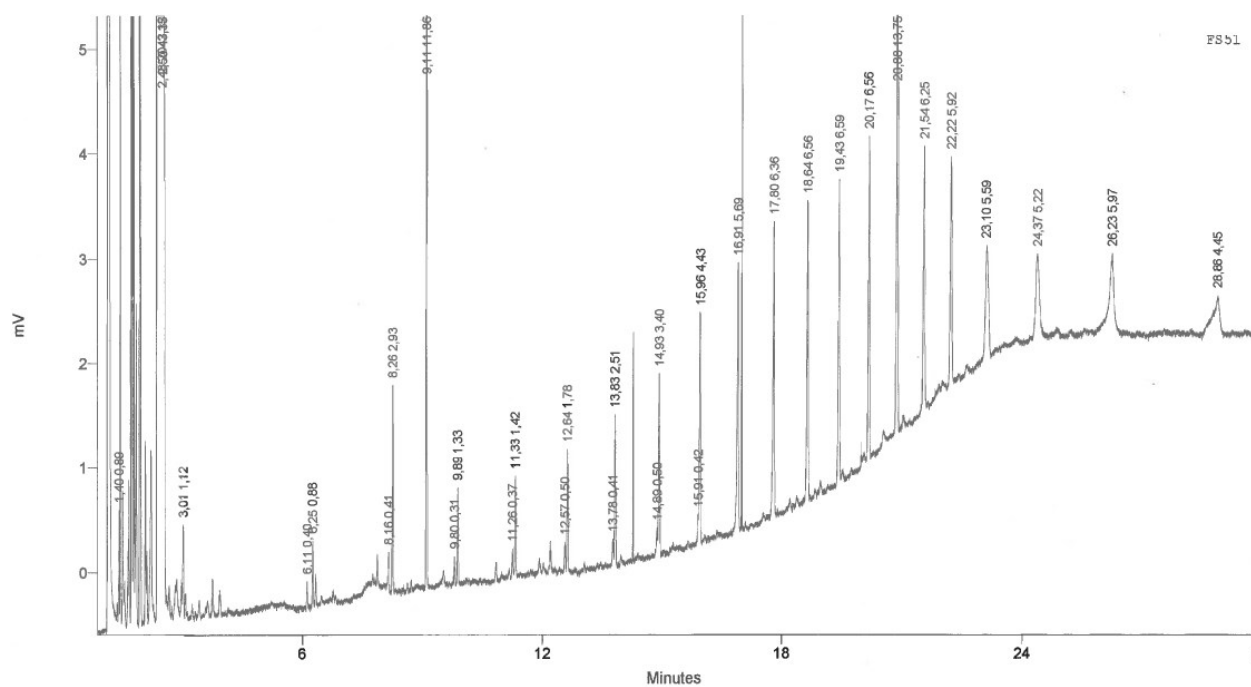

Figure S2-10a Raw signal Gas Chromatography analysis Entry 10 Table 1.

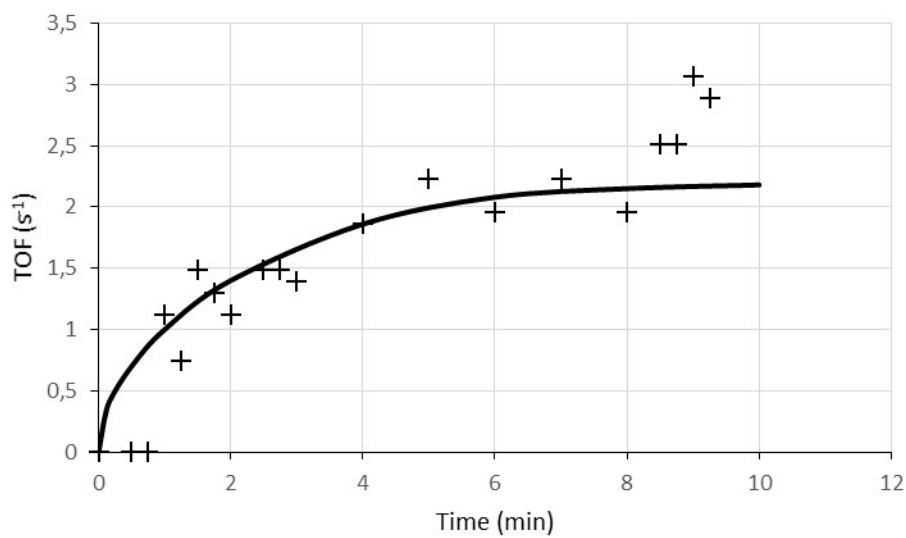

Figure S2-10b Kinetic measurement of ethylene consumption Entry 10 Table 1.

S2 continuing

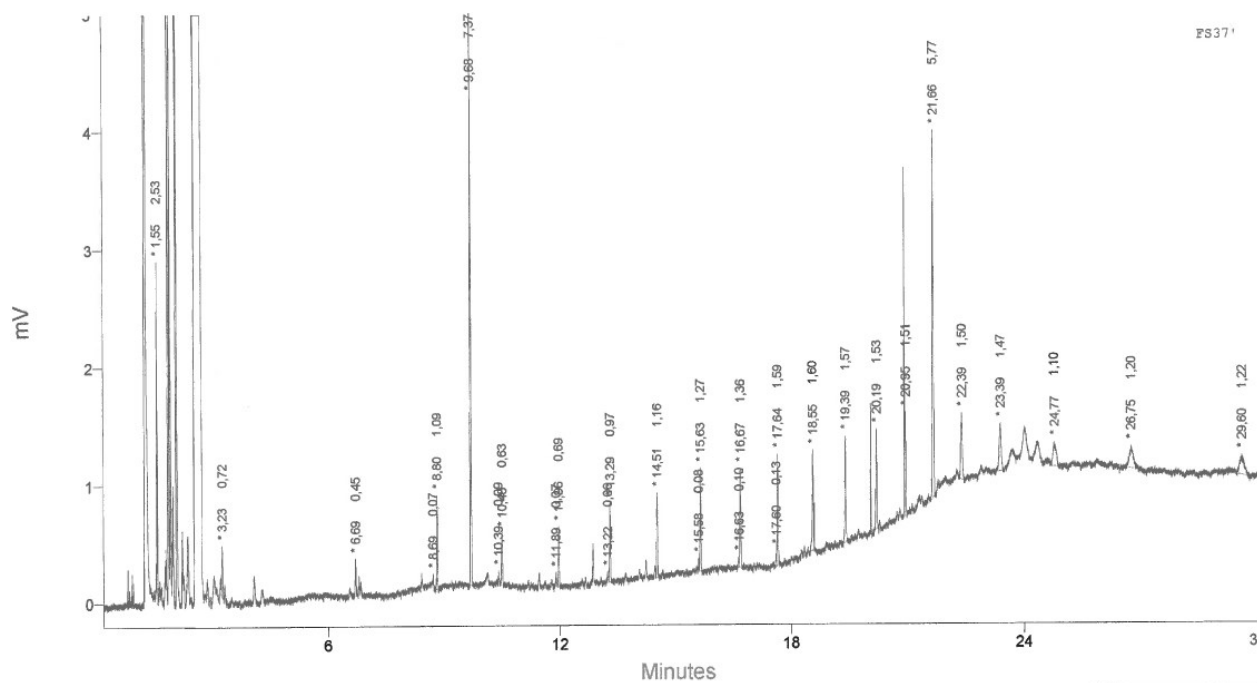

Figure S2-11a Raw signal Gas Chromatography analysis Entry 11 Table 1.

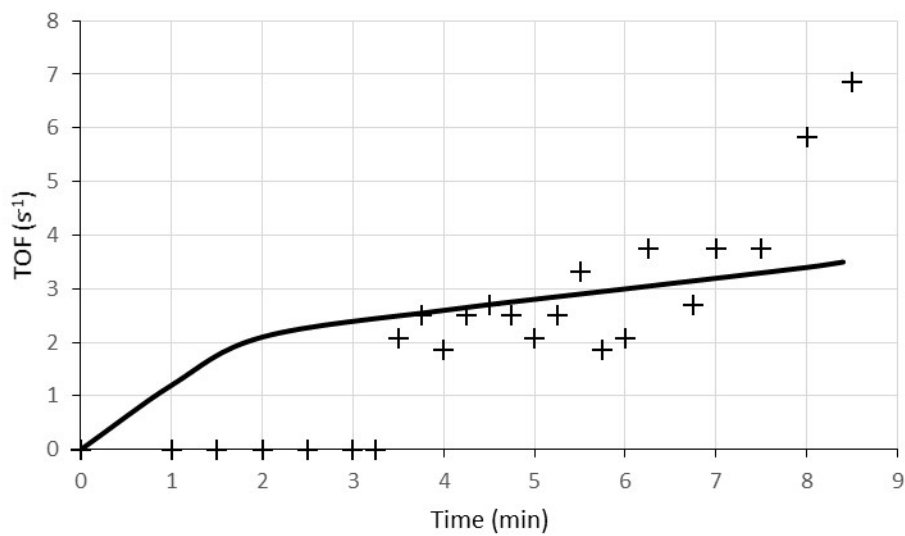

Figure S2-11b Kinetic measurement of ethylene consumption Entry 11 Table 1.

S2 continuing

Too low amounts of polymer

Figure S2-12a Raw signal Gas Chromatography analysis Entry 12 Table 1.

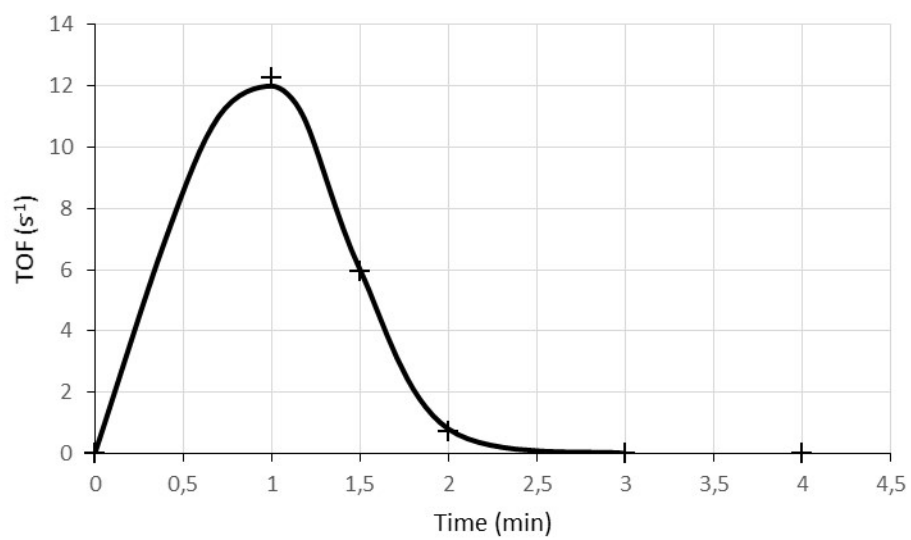

Figure S2-12b Kinetic measurement of ethylene consumption Entry 12 Table 1.

S2 continuing

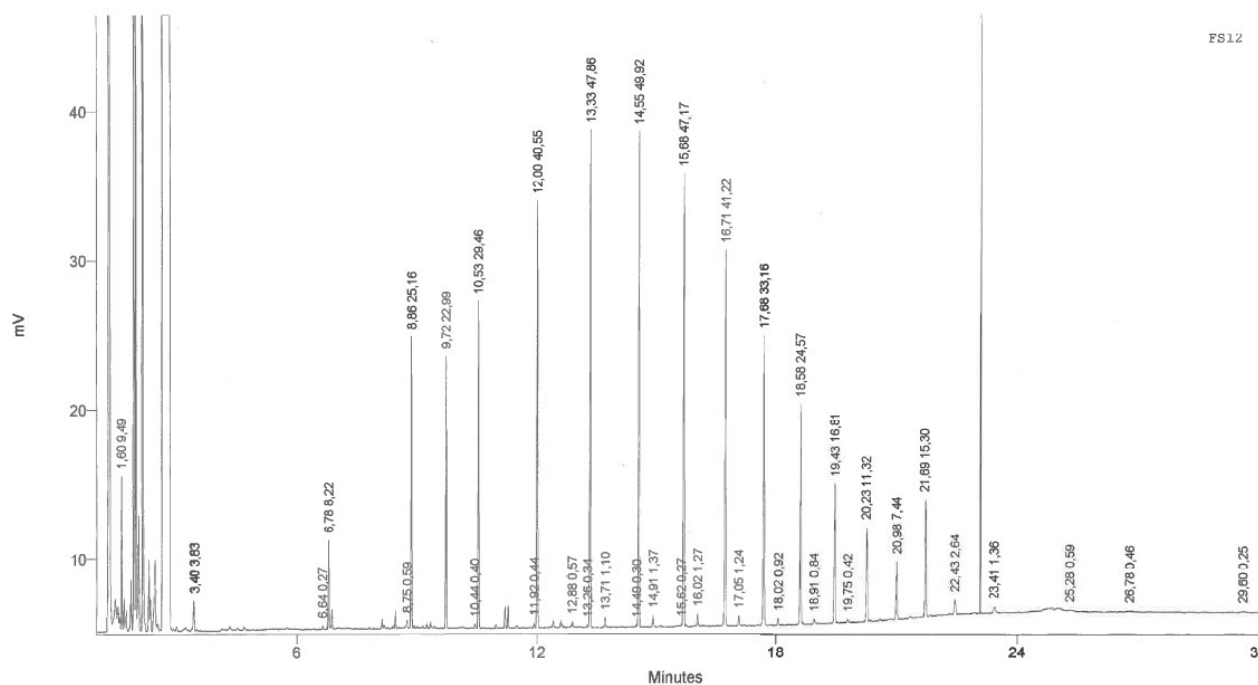

Figure S2-13a Raw signal Gas Chromatography analysis Entry 13 Table 1.

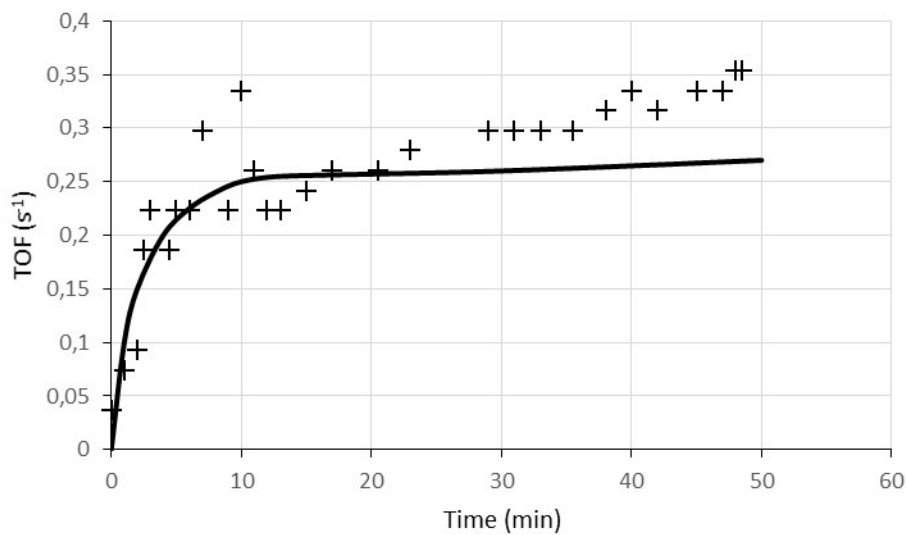

Figure S2-13b Kinetic measurement of ethylene consumption Entry 13 Table 1.

S2 continuing

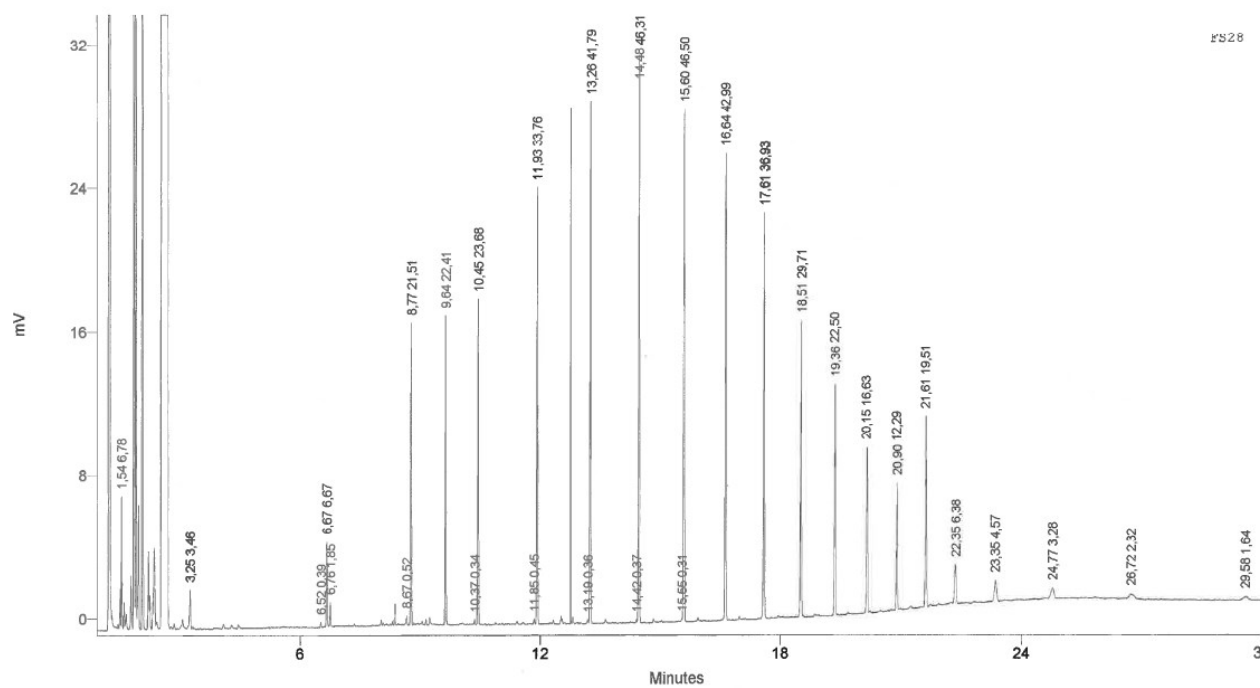

Figure S2-14a Raw signal Gas Chromatography analysis Entry 14 Table 1.

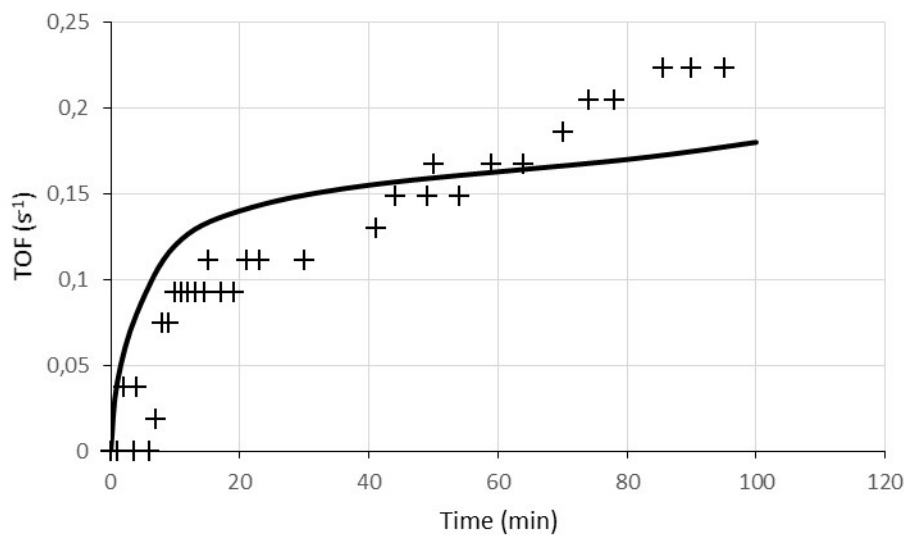

Figure S2-14b Kinetic measurement of ethylene consumption Entry 14 Table 1.

S2 continuing

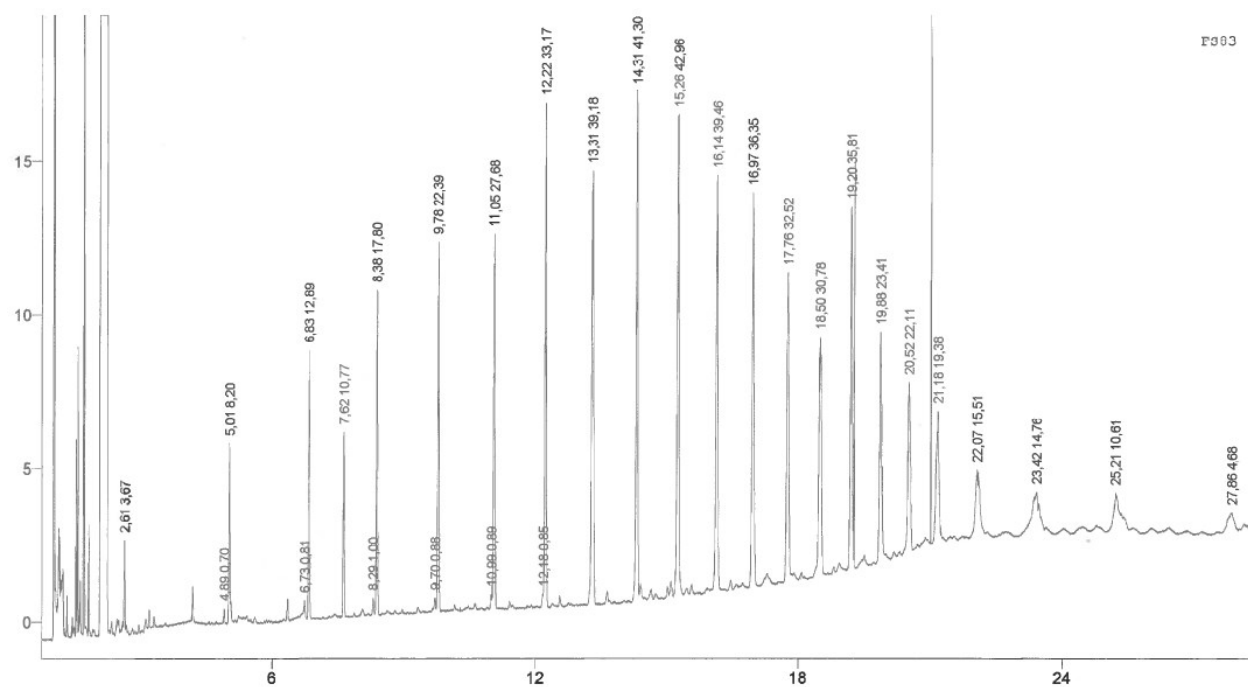

Figure S2-15a Raw signal Gas Chromatography analysis Entry 15 Table 1.

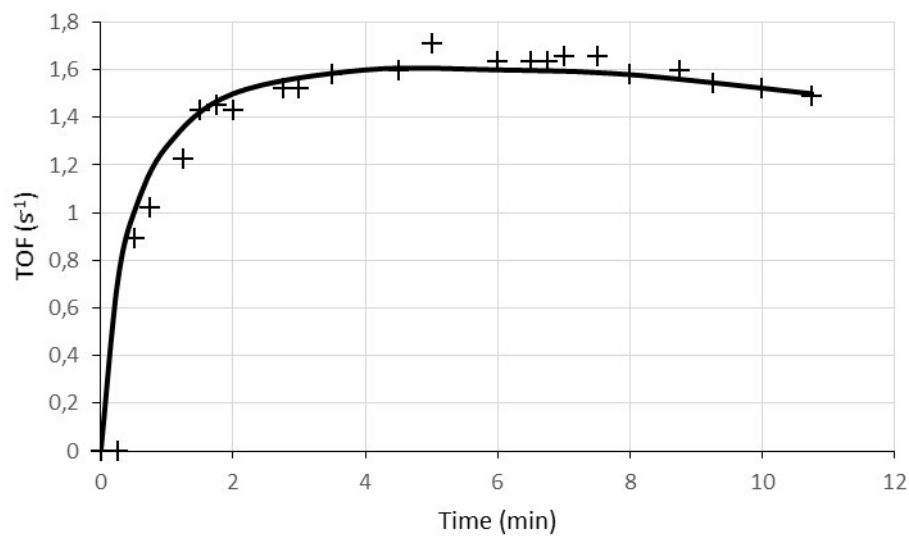

Figure S2-15b Kinetic measurement of ethylene consumption Entry 15 Table 1.

S2 continuing

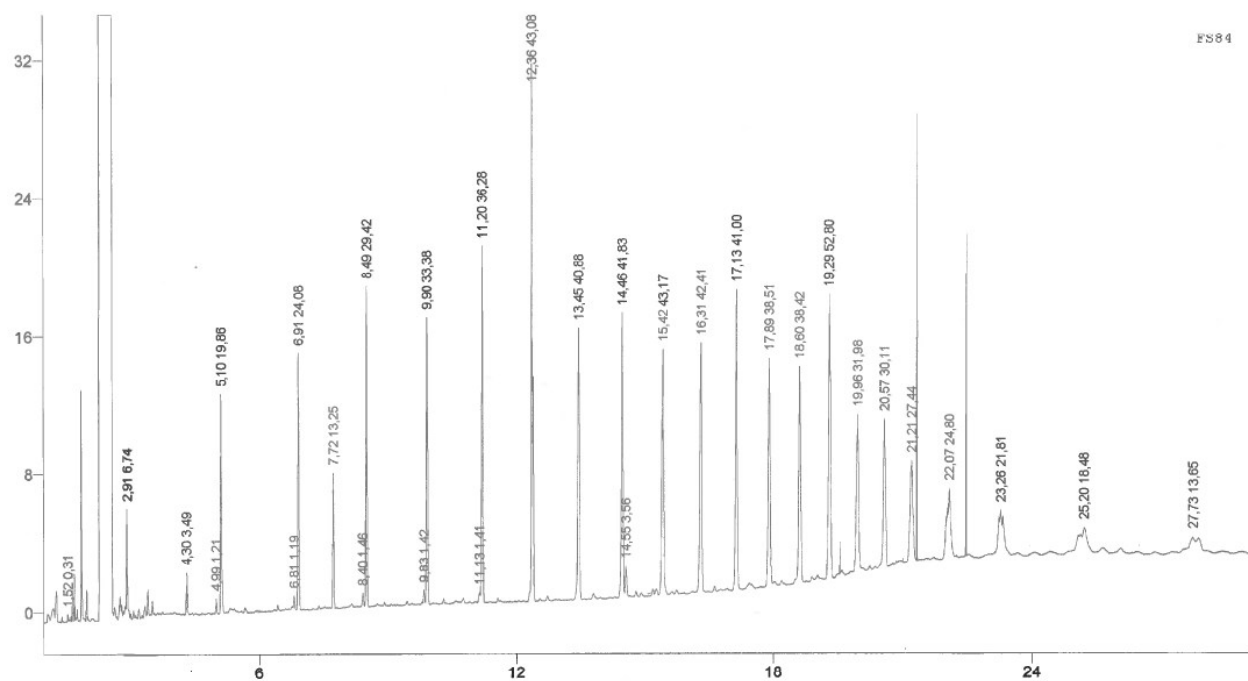

Figure S2-16a Raw signal Gas Chromatography analysis Entry 16 Table 1.

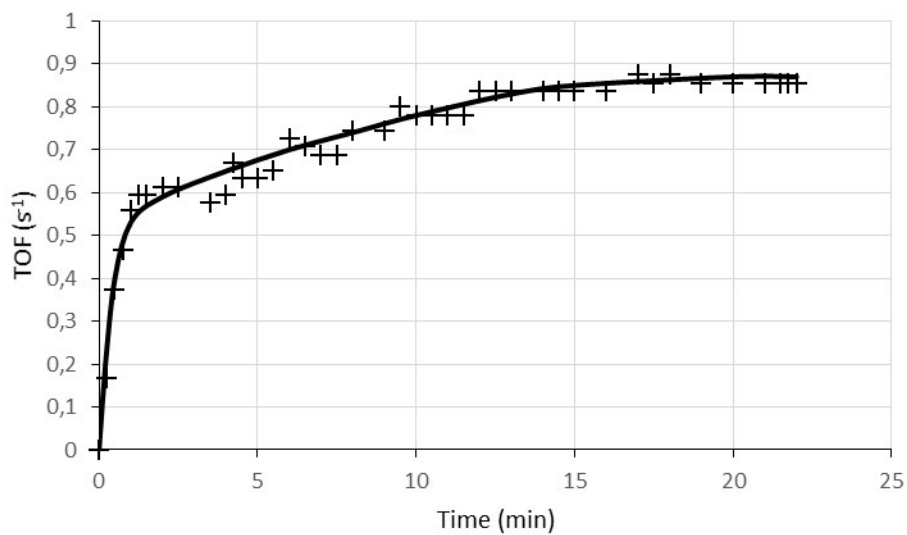

Figure S2-16b Kinetic measurement of ethylene consumption Entry 16 Table 1.

S2 continuing

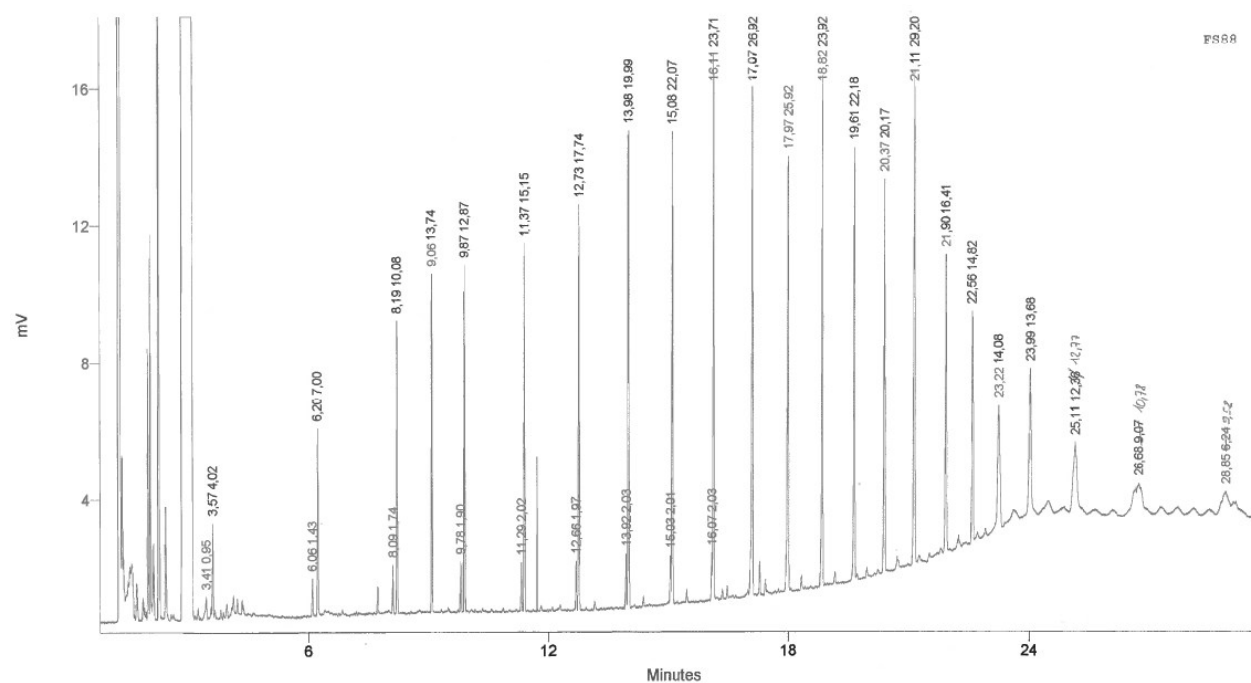

Figure S2-17a Raw signal Gas Chromatography analysis Entry 17 Table 1.

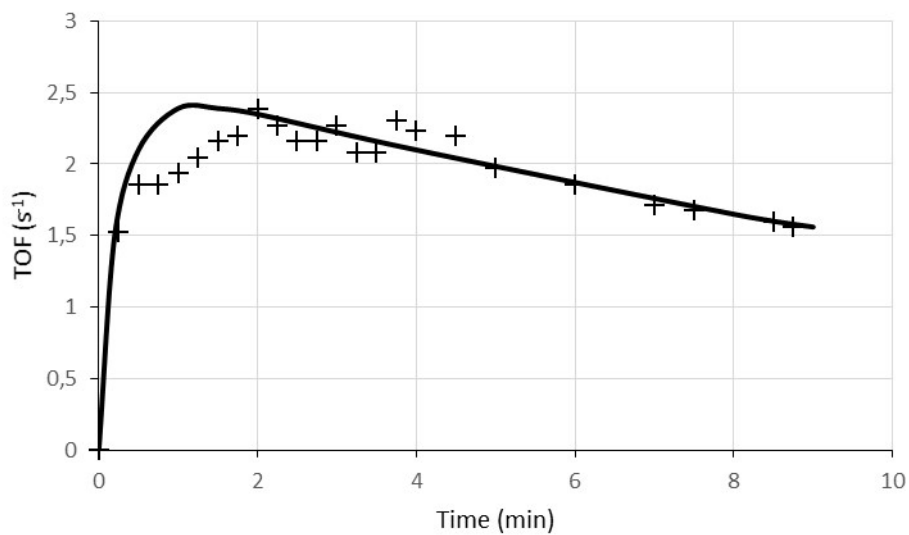

Figure S2-17b Kinetic measurement of ethylene consumption Entry 17 Table 1.



S2 continuing

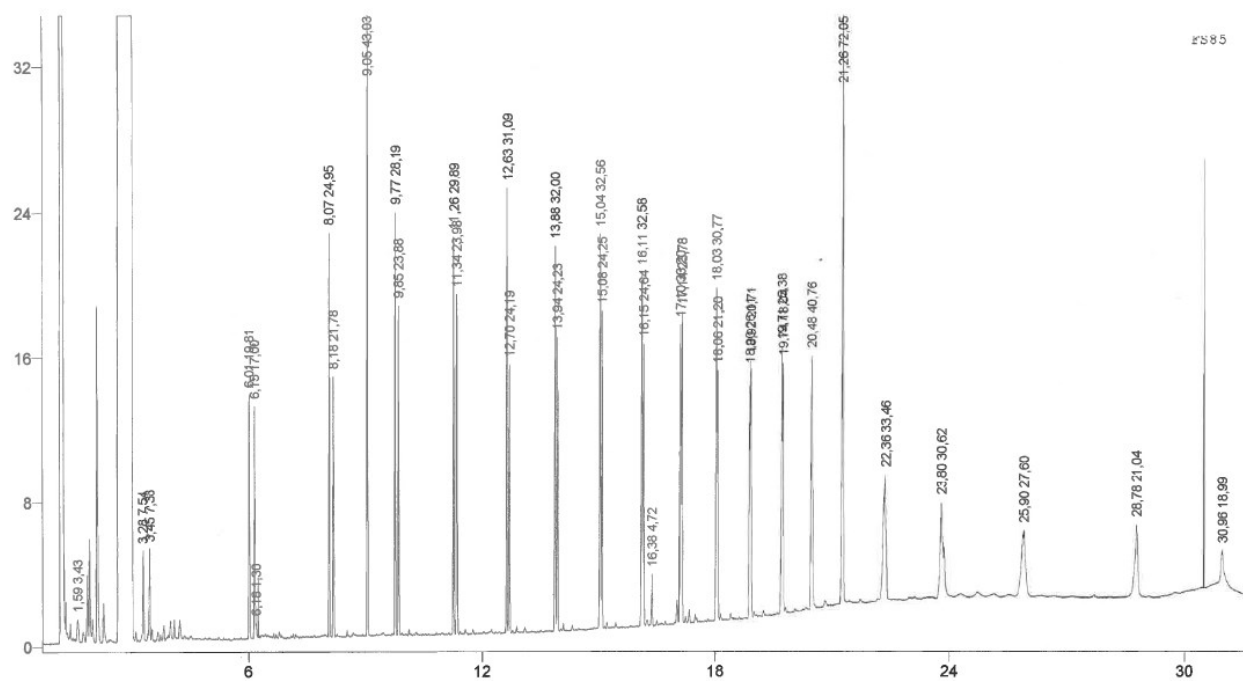

Figure S2-18a Raw signal Gas Chromatography analysis Entry 18 Table 1.

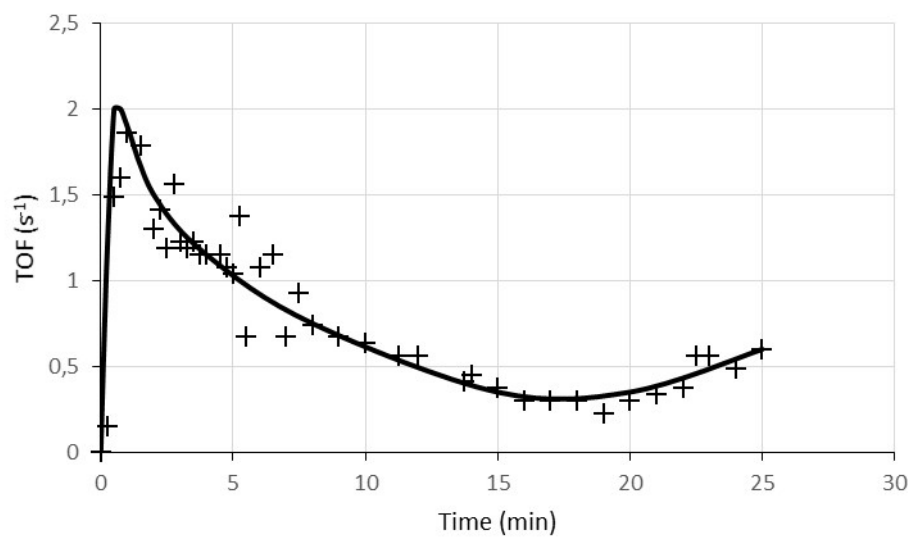

Figure S2-18b Kinetic measurement of ethylene consumption Entry 18 Table 1.

S2 continuing

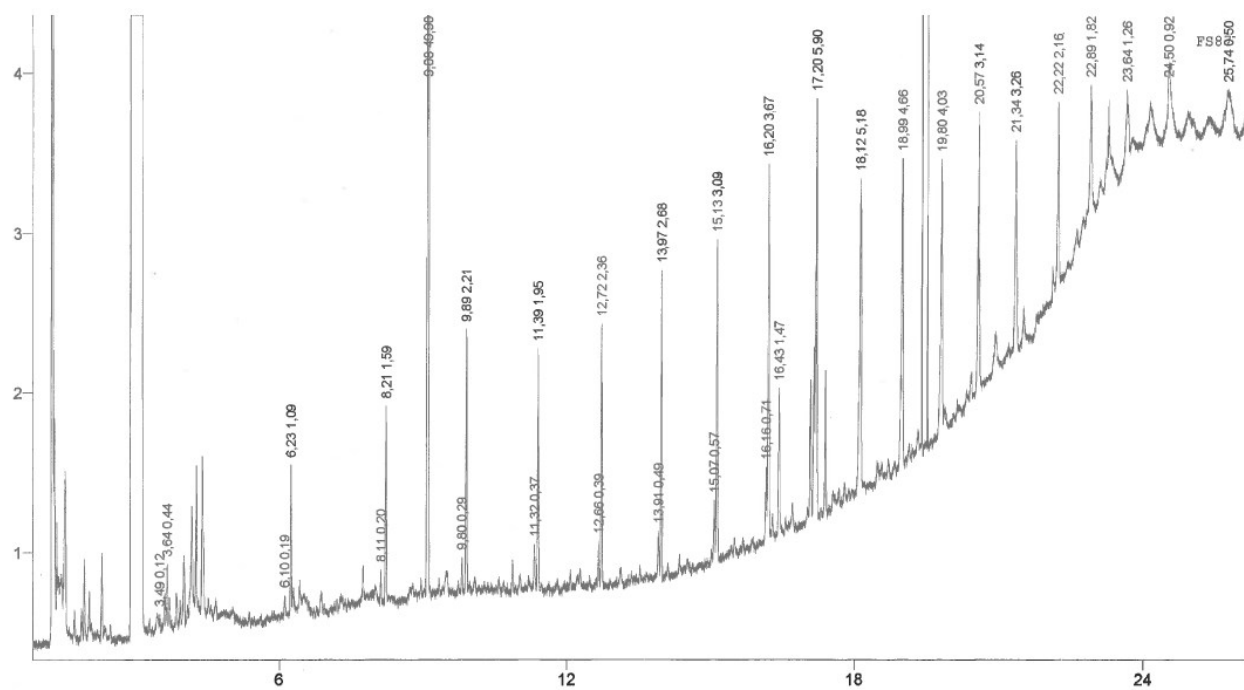

Figure S2-19a Raw signal Gas Chromatography analysis Entry 19 Table 1.

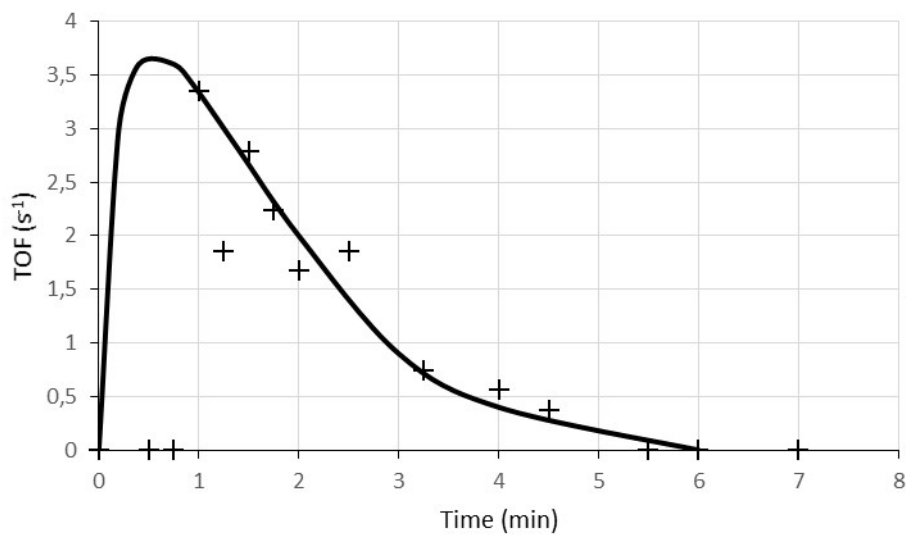

Figure S2-19b Kinetic measurement of ethylene consumption Entry 19 Table 1.

S3 Detailed conditions and results of each experiment presented in **Table 2**: Improvement of the reaction rate upon using different ether additives on the CCG of ethylene on butyl-ethyl-magnesium using  $\text{Cp}^*\text{NdCl}_2\text{Li}(\text{OEt}_2)_2$  as catalytic precursor.

Common conditions: solvent, toluene 250 mL; batch reactor, total volume 600 mL (entry 23: small reactor, 20 mL); regulated temperature by circulating water in the calandria; stirring at 1000 rpm with a gas impeller; start by casting the Nd + ether solution from an upper isobar cylinder; initial pressure of ethylene monomer 4.8 bar abs.; free consumption until atmospheric pressure, then stop by opening the reactor to air and immediate precipitation by quench in 1 L acidified methanol, cooling 1 h, filtration and drying; mass of polymerised ethylene 4.65 g (166 mmol).

Table S3

| Entry | Ether           | Nd<br>( $\mu\text{mol}$ ) | Mg<br>(mmol) | Ether<br>(mmol) | Initial<br>Temperature<br>( $^{\circ}\text{C}$ ) | Maximum<br>Temperature<br>( $^{\circ}\text{C}$ ) | Note          |
|-------|-----------------|---------------------------|--------------|-----------------|--------------------------------------------------|--------------------------------------------------|---------------|
| 20    | 12-crown-4      | 6.27                      | 4.99         | 5.76            | 70.7                                             | 89.0                                             |               |
| 21    | 15-crown-5      | 6.31                      | 4.98         | 4.99            | 71.6                                             | 73.2                                             |               |
| 22    | Tetraglyme      | 6.31                      | 4.98         | 4.99            | 69.3                                             | 93.1                                             | Yellow colour |
| 23    | Dimethoxyethane | 6.20                      | 4.98         | 9.76            | 69.8                                             | 73.7                                             |               |

Nota Bene:

Temperature was recorded from an internal probe in an assembly having some inertia, the values must therefore be compared with each other in relative mode, and they are not representative of the exact local temperature at a given moment, when the evolution is rapid.

The catalytic activities expressed in the following figures are Turnover Frequencies (moles of ethylene consumed by moles of neodymium catalyst and by time) and they have been calculated from the recorded pressure drop as a function of time, assuming that mass is proportional to pressure.

S3 continuing.

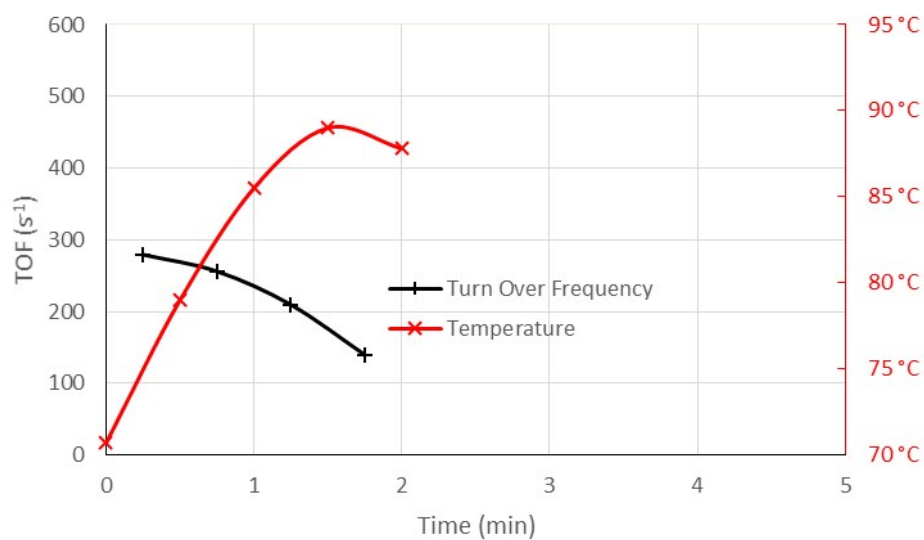

Figure S3-1 Activity and Temperature effect of the exothermic reaction, Entry 20 Table 2.  
(12-crown-4)

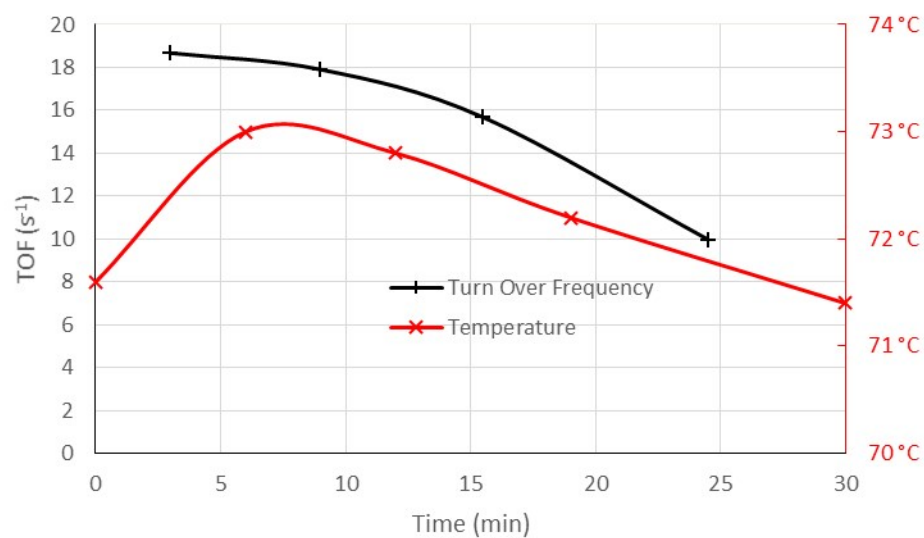

Figure S3-2 Activity and Temperature effect of the exothermic reaction, Entry 21 Table 2.  
(15-crown-5)

S3 continuing.

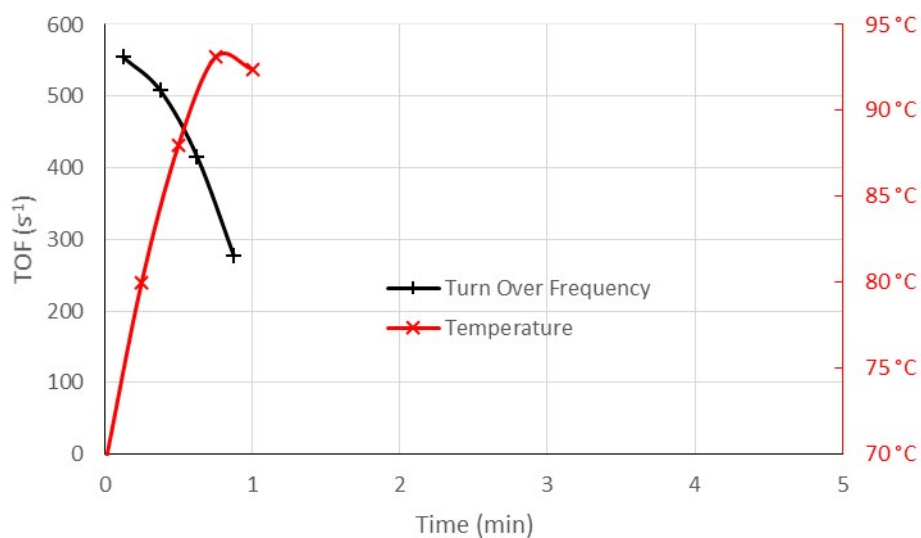

Figure S3-3 Activity and Temperature effect of the exothermic reaction, Entry 22 Table 2. (tetraglyme)

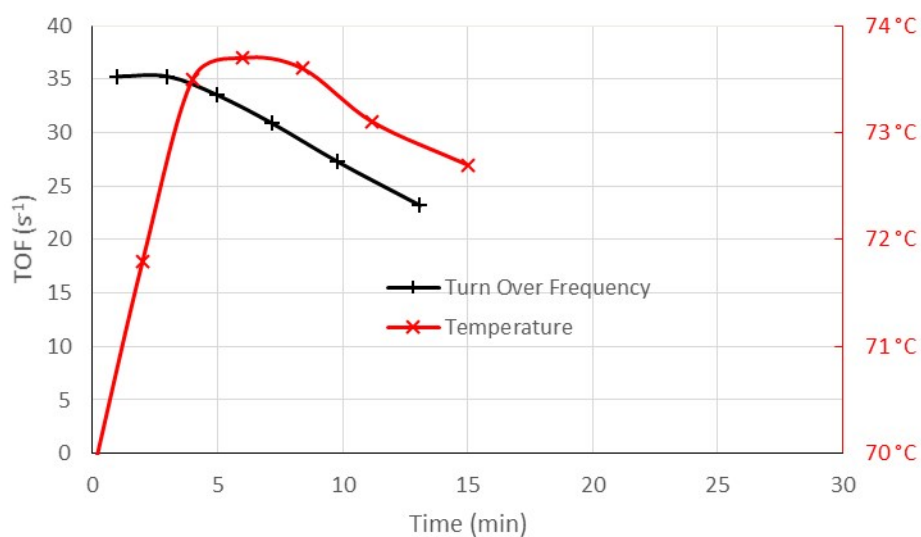

Figure S3-4 Activity and Temperature effect of the exothermic reaction, Entry 23 Table 2. (dimethoxyethane)

S4 Detailed conditions and results of each experiment presented in **Tables 3** and **4**: one pot synthesis of narrow dispersed high molecular weight fatty alcohols.

Table S4 – 1 Detailed conditions of the first step: polymerisation.

| Entry | Volume <sup>a</sup><br>(mL) | Pressure <sup>b</sup><br>(bar abs.) | Temperature <sup>c</sup><br>(°C) | Nd <sup>d</sup><br>(μmol) | Mg <sup>e</sup><br>(mmol) | DME <sup>f</sup><br>(mmol) | Time<br>(min) | Ethylene<br>uptake (g) |
|-------|-----------------------------|-------------------------------------|----------------------------------|---------------------------|---------------------------|----------------------------|---------------|------------------------|
| 1     | 250                         | 3.8 – 0.5                           | 70 – 72.9                        | 6.25                      | 4.99                      | 10.0                       | 15            | 3.91                   |
| 2     | 20                          | 1.15                                | 50                               | 1.56                      | 0.405                     | 0.410                      | 4             | 0.29                   |
| 3     | 20                          | 1.4                                 | 50                               | 1.41                      | 1.00                      | 0.99                       | 15            | 1.00                   |
| 4     | 20                          | 1.4                                 | 50                               | 1.88                      | 1.016                     | 1.08 <sup>g</sup>          | 15            | 1.13                   |
| 5     | 250                         | 6 – 1                               | 50 – 61                          | 8.70                      | 5.01                      | 5.62                       | 15            | 6.08                   |
| 6     | 250                         | 6 – 1                               | 70 – 85 <sup>h</sup>             | 5.91                      | 4.97                      | 8.98                       | 15            | 6.01                   |
| 7     | 250                         | 4.8 – 0.5                           | 70 – 76 <sup>h</sup>             | 3.42                      | 4.99                      | 9.12                       | 30            | 5.38                   |
| 8     | 250                         | 4.8 – 0.5                           | 70 – 87 <sup>h</sup>             | 8.27                      | 5.10                      | 9.62                       | 15            | 5.32                   |
| 9     | 250                         | 5 – 1                               | 72 – 80                          | 6.09                      | 5.01                      | 9.25                       | 15            | 4.96                   |
| 10    | 250                         | 3.8 – 1                             | 70 – 72                          | 6.09                      | 5.03                      | 9.25                       | 15            | 3.29                   |

<sup>a</sup> Toluene as solvent. For 20 mL, use of the small reactor with continuous ethylene intake on demand at constant pressure. For 250 mL, use of a batch reactor. <sup>b</sup> For the batch reactor, initial and final pressures are given. <sup>c</sup> For the batch reactor, real temperature of the solution is given ( $\Delta T$  is due to the exothermic reaction), while for the small reactor (no probe inside) only the temperature of the water, circulating in the calandria, is given. <sup>d</sup>  $\text{Cp}^*_2\text{NdCl}_2\text{Li}(\text{OEt}_2)_2$ . <sup>e</sup> BEM Butyl-Ethyl-Magnesium. <sup>f</sup> DME dimethoxyethane. <sup>g</sup> 12-crown-4 instead of DME. <sup>h</sup> No decrease of temperature at the end of the polymerisation step because the next steps needed higher temperature, so the water of the calandria was evacuated in order to heat the reactor with hot air of a heat gun.

S4 continuing

Table S4 – 2 Detailed conditions of the next steps: oxidation and hydrolysis.

| Entry           | Oxidation Temperature (°C) | Oxidation Pressure (bar abs) | Oxidation Time (min) | Hydrolysis and work-up <sup>a</sup> |
|-----------------|----------------------------|------------------------------|----------------------|-------------------------------------|
| 1-1             | 70                         | 2                            | 30                   | Air                                 |
| 1-2             |                            |                              |                      | Water                               |
| 1-3             |                            |                              |                      | Conc. HCl                           |
| 1-4             |                            |                              |                      | H <sub>2</sub> SO <sub>4</sub>      |
| 1-5             |                            |                              |                      | Butanol                             |
| 1-6             |                            |                              |                      | Standard                            |
| 2               | 50                         | 1                            | 30                   | Standard                            |
| 3               | 50                         | 1                            | 30                   | Standard                            |
| 4               | 50                         | 1                            | 30                   | Standard                            |
| 5               | 50                         | 1                            | 30                   | Standard                            |
| 6               | 120                        | 2-2.5                        | 10                   | Standard                            |
| 7               | 130                        | 2-3.3                        | 15                   | Standard                            |
| 8               | 150                        | 2-3.6                        | 15                   | Standard                            |
| 9 <sup>b</sup>  | 70                         | 1-2                          | 30                   | Standard                            |
| 10 <sup>c</sup> | 70                         | 1-2                          | 30                   | Standard                            |

<sup>a</sup> See Experimental part for details. <sup>b</sup> 2 mol% Fe(acac)<sub>3</sub> vs Mg. <sup>c</sup> 2 mol% Ti(OiPr)<sub>4</sub> vs Mg.

S4 continuing, Entry 1-1 Table 3.

Nota Bene: GC analyses of Entries 1-1 to 1-6 were performed with a 30 m column, injector and detector at 350 °C and oven temperature limited to 300 °C. The standard at 10 min was tetradecane.

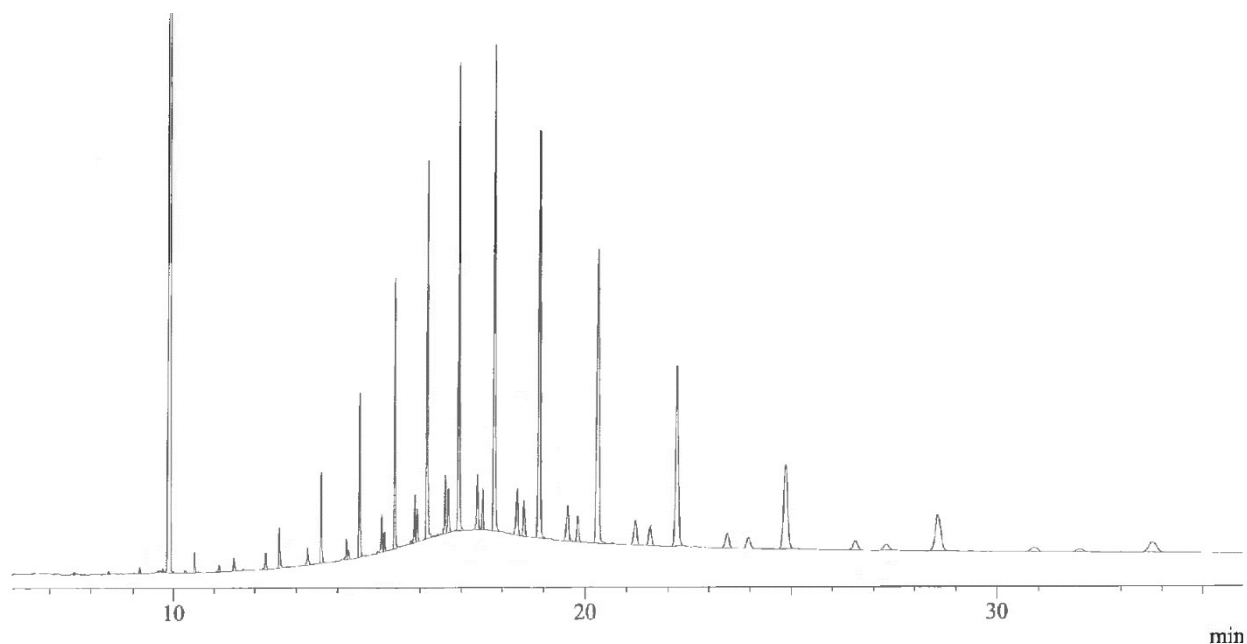

Figure S4-1-1a Raw signal Gas Chromatography analysis Entry 1-1 Table 3.

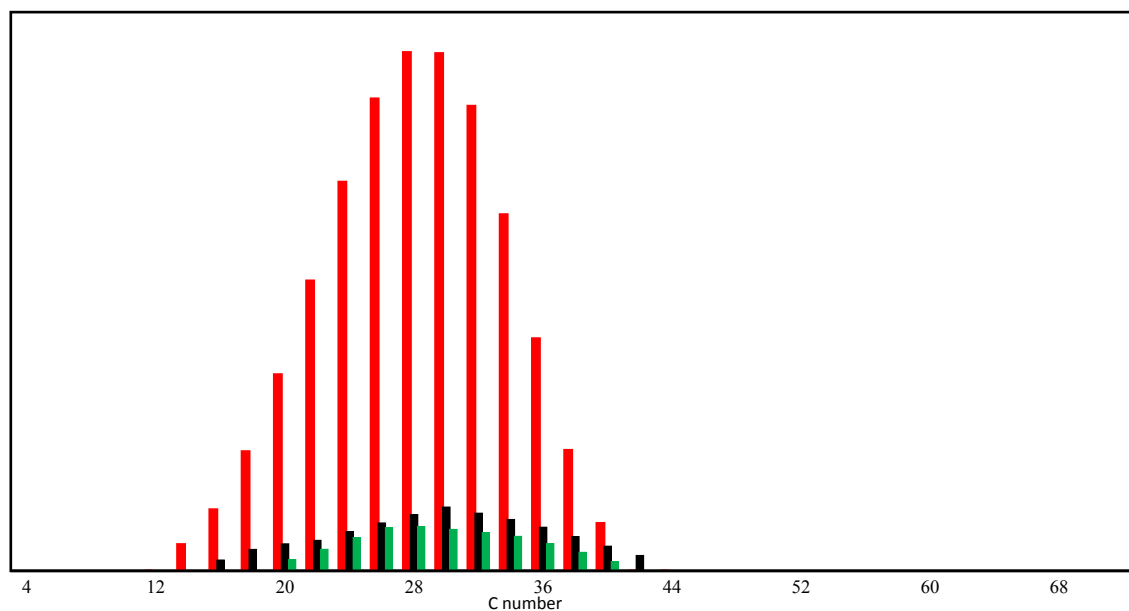

Figure S4-1-1b Distributions of alcohols ROH (red), hydrocarbons RH (black) and aldehydes RCHO (green). Molar amounts calculated from the GC analysis of Entry 1-1 Table 3.



S4 continuing, Entry 1-1 Table 3.

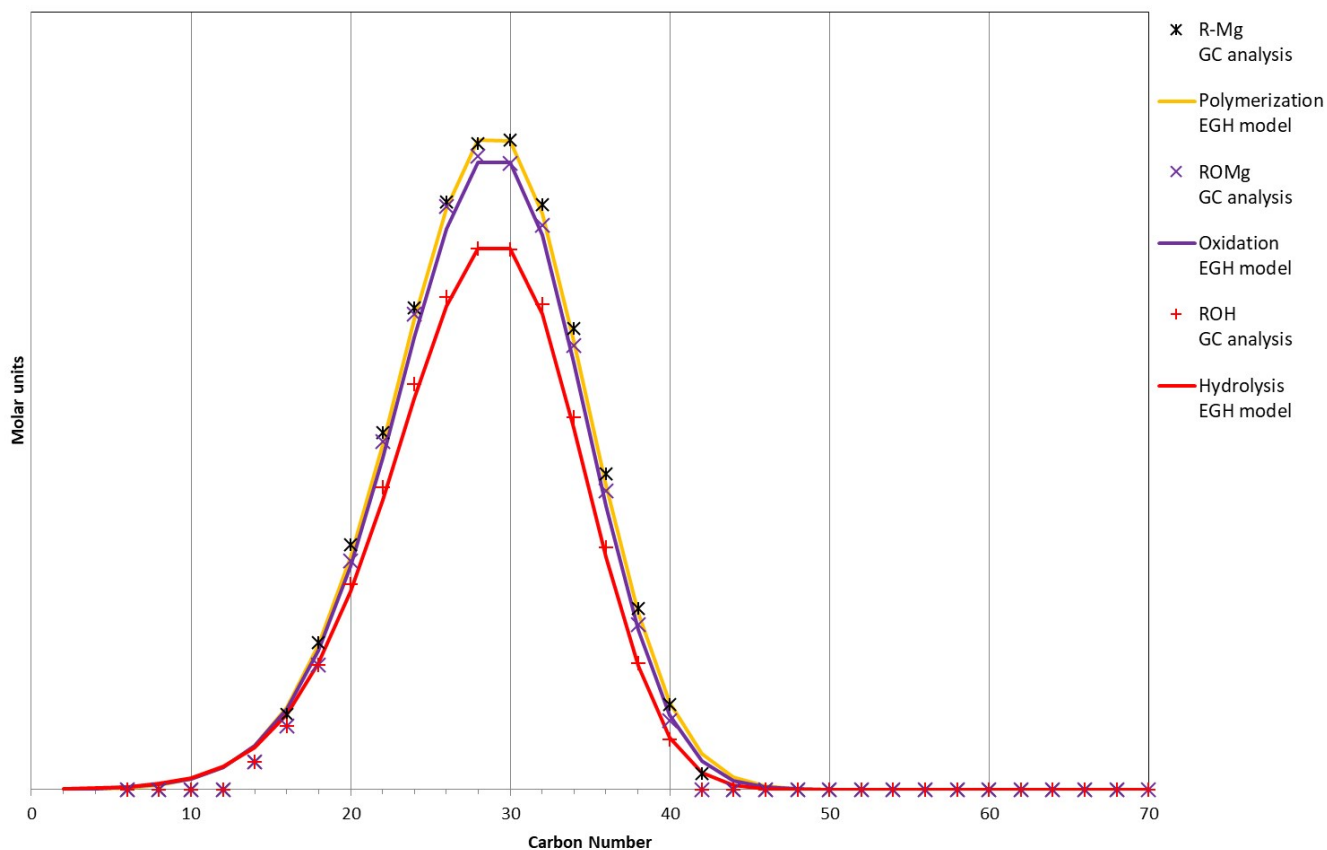

Figure S4-1-1c Distributions (graphics) resulting from polymerisation, oxidation and hydrolysis steps, and fitting using the Exponential-Gaussian-Hybrid model, based on the GC analysis of Entry 1-1 Table 3.

Table S4-1-1 Distributions (numerics) resulting from polymerisation, oxidation and hydrolysis steps, and fitting using the Exponential-Gaussian-Hybrid model, based on the GC analysis of Entry 1-1 Table 3.

| Step                                                        | Polymerisation  | Oxidation     | Hydrolysis   |
|-------------------------------------------------------------|-----------------|---------------|--------------|
| Distribution                                                | <b>R-Mg</b>     | <b>R-O-Mg</b> | <b>R-O-H</b> |
| sum of GC peaks                                             | ROH + RCHO + RH | ROH + 2 RCHO  | ROH          |
| Step efficiency<br>relative area of EGH fitting             |                 | <b>95.6%</b>  | <b>85.7%</b> |
| R <sup>2</sup> of EGH fitting                               | 0.9986          | 0.9969        | 0.9981       |
| Mn (Carbon number) of EGH fitting                           | <b>28.32</b>    | 28.21         | 27.95        |
| Dispersity of EGH fitting                                   | <b>1.04</b>     | 1.04          | 1.04         |
| Dispersity awaited for a<br>Poisson distribution of same Mn | 1.063           | 1.063         | 1.064        |
| Skewness of EGH fitting                                     | -0.225          | -0.265        | -0.352       |
| Skewness awaited for a<br>Poisson distribution of same Mn   | 0.281           | 0.282         | 0.283        |

S4 continuing, Entry 1-2 Table 3.

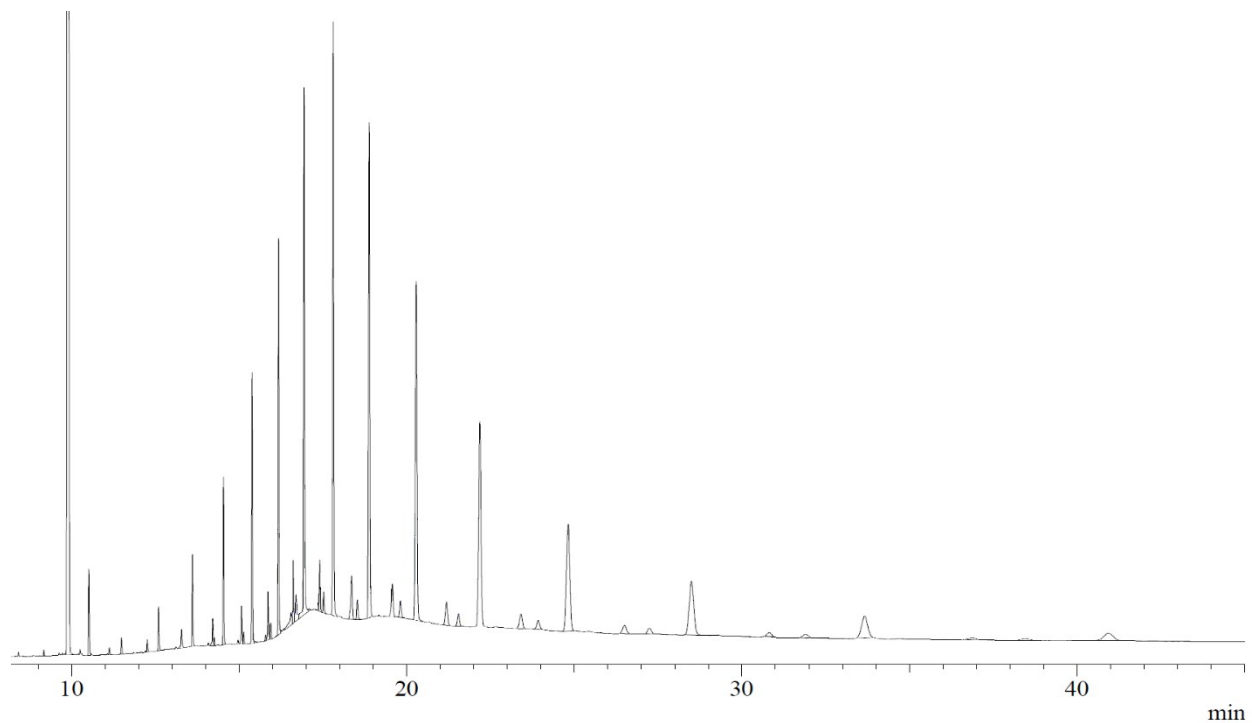

Figure S4-1-2a Raw signal Gas Chromatography analysis Entry 1-2 Table 3.

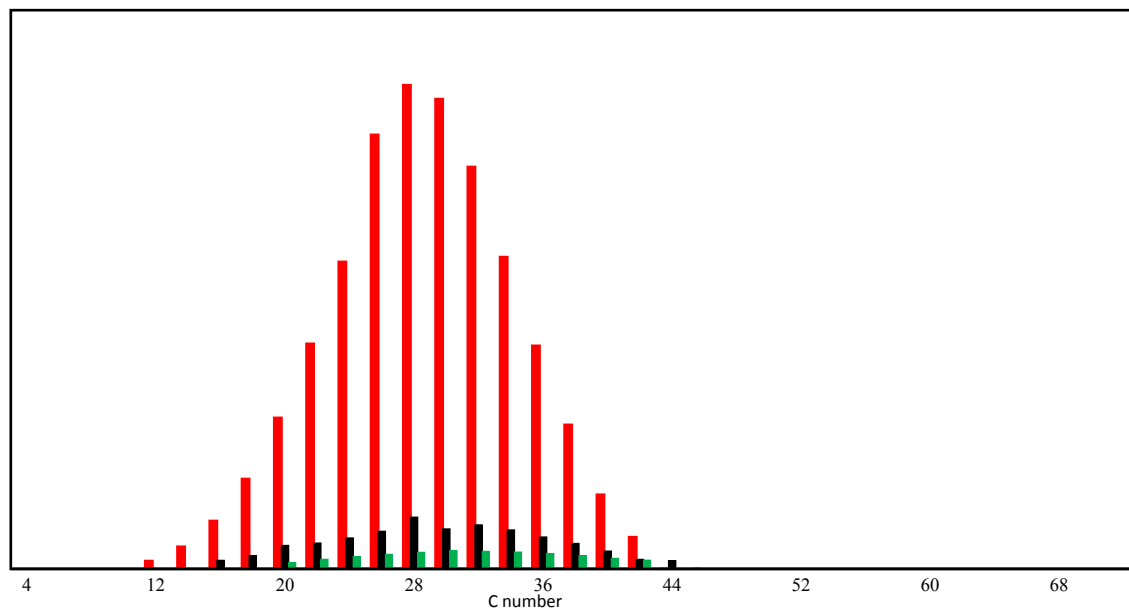

Figure S4-1-2b Distributions of alcohols ROH (red), hydrocarbons RH (black) and aldehydes RCHO (green). Molar amounts calculated from the GC analysis of Entry 1-2 Table 3.

S4 continuing, Entry 1-2 Table 3.

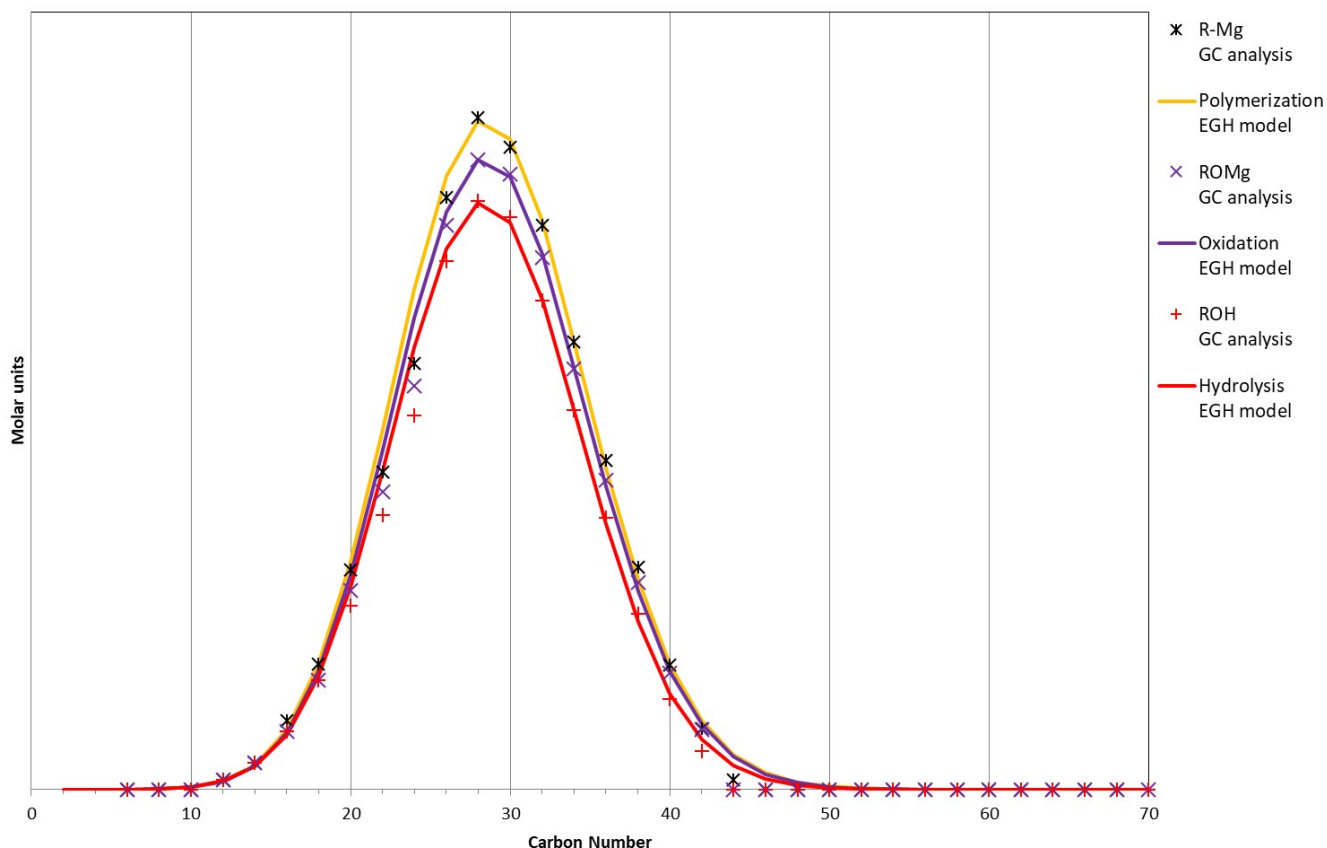

Figure S4-1-2c Distributions (graphics) resulting from polymerisation, oxidation and hydrolysis steps, and fitting using the Exponential-Gaussian-Hybrid model, based on the GC analysis of Entry 1-2 Table 3.

Table S4-1-2 Distributions (numerics) resulting from polymerisation, oxidation and hydrolysis steps, and fitting using the Exponential-Gaussian-Hybrid model, based on the GC analysis of Entry 1-2 Table 3.

| Step                                                        | Polymerisation  | Oxidation     | Hydrolysis   |
|-------------------------------------------------------------|-----------------|---------------|--------------|
| Distribution                                                | <b>R-Mg</b>     | <b>R-O-Mg</b> | <b>R-O-H</b> |
| sum of GC peaks                                             | ROH + RCHO + RH | ROH + 2 RCHO  | ROH          |
| Step efficiency<br>relative area of EGH fitting             |                 | <b>94.2%</b>  | <b>91.5%</b> |
| R <sup>2</sup> of EGH fitting                               | 0.9918          | 0.9914        | 0.9892       |
| Mn (Carbon number) of EGH fitting                           | <b>28.95</b>    | 28.95         | 28.70        |
| Dispersity of EGH fitting                                   | <b>1.04</b>     | 1.04          | 1.04         |
| Dispersity awaited for a<br>Poisson distribution of same Mn | 1.062           | 1.062         | 1.062        |
| Skewness of EGH fitting                                     | 0.150           | 0.150         | 0.102        |
| Skewness awaited for a<br>Poisson distribution of same Mn   | 0.278           | 0.278         | 0.279        |

S4 continuing, Entry 1-3 Table 3.

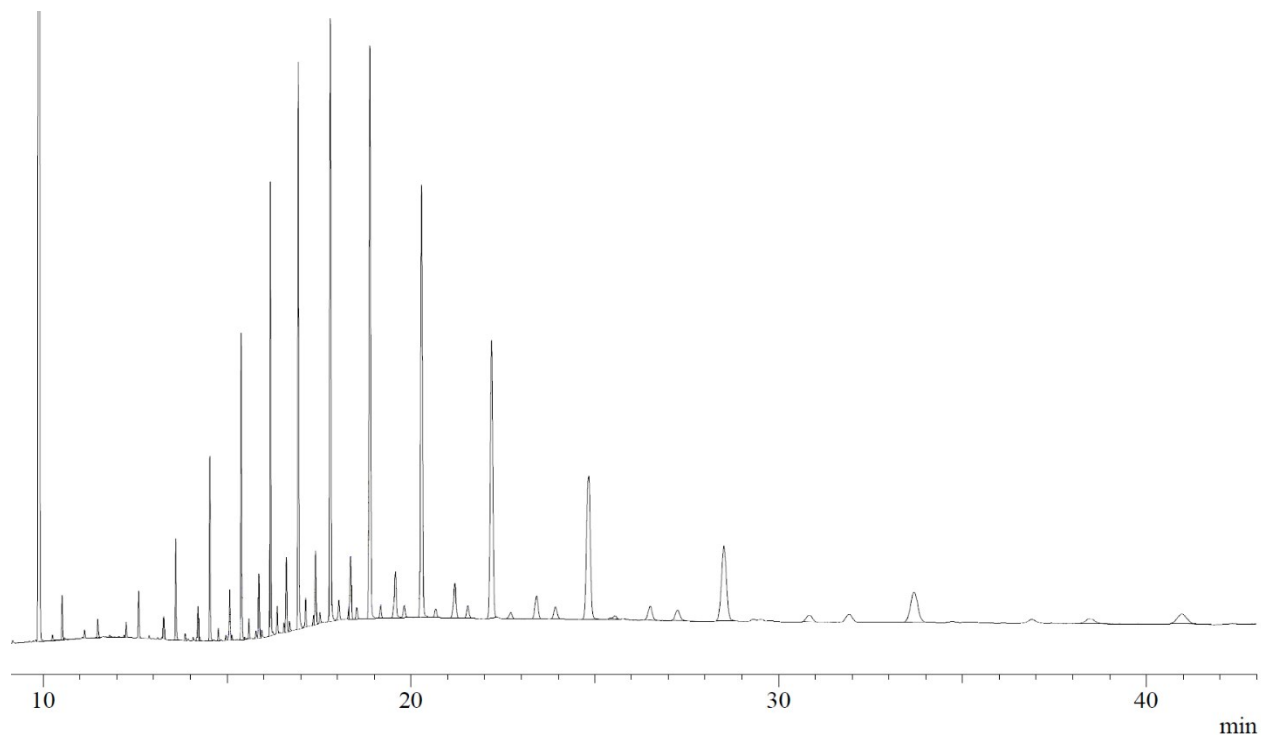

Figure S4-1-3a Raw signal Gas Chromatography analysis Entry 1-3 Table 3.

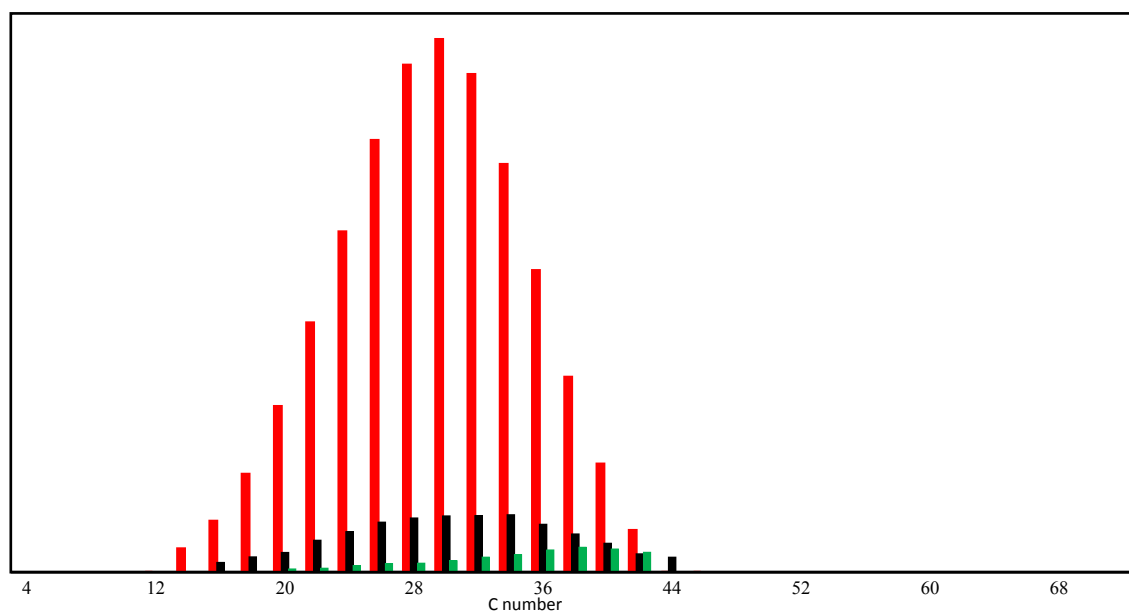

Figure S4-1-3b Distributions of alcohols ROH (red), hydrocarbons RH (black) and aldehydes RCHO (green). Molar amounts calculated from the GC analysis of Entry 1-3 Table 3.

S4 continuing, Entry 1-3 Table 3.

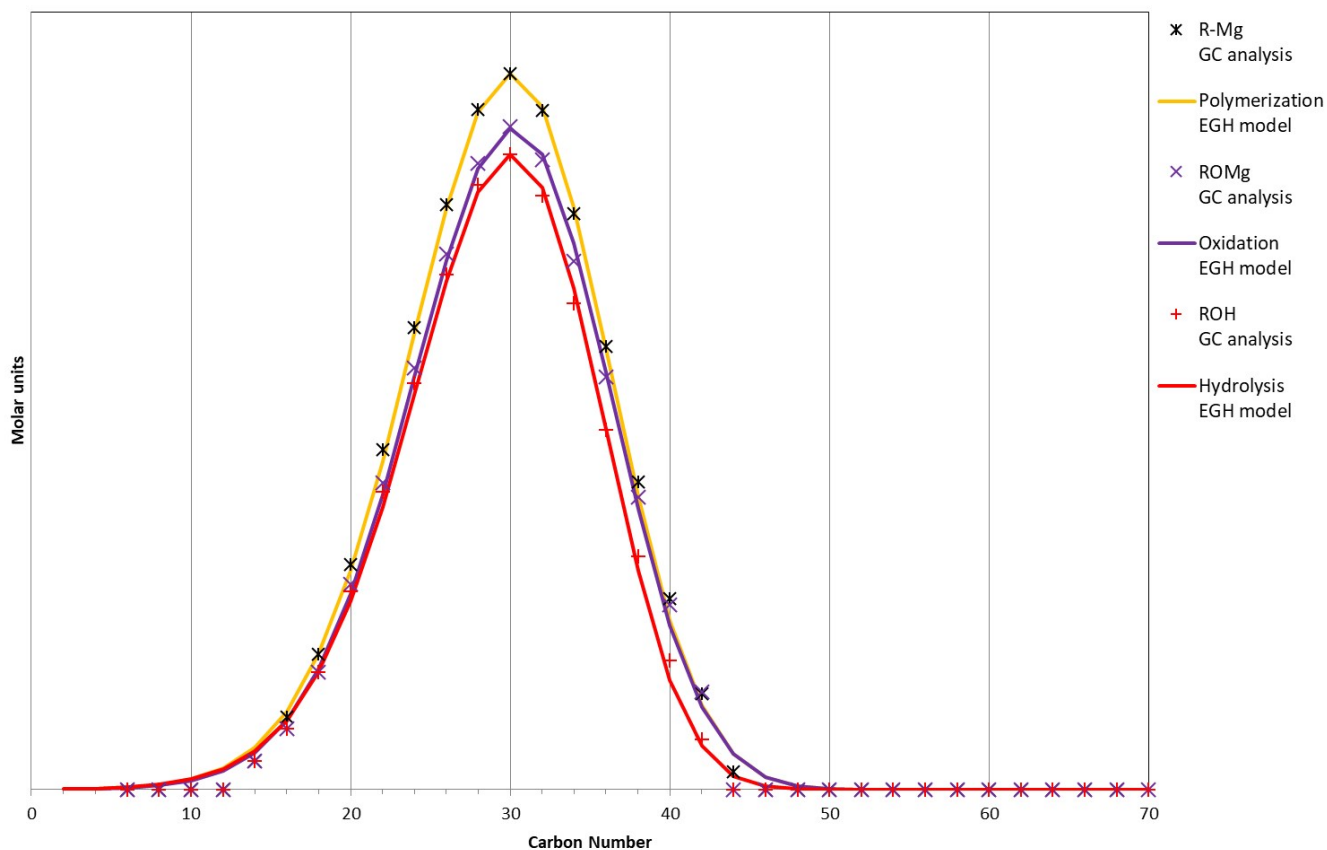

Figure S4-1-3c Distributions (graphics) resulting from polymerisation, oxidation and hydrolysis steps, and fitting using the Exponential-Gaussian-Hybrid model, based on the GC analysis of Entry 1-3 Table 3.

Table S4-1-3 Distributions (numerics) resulting from polymerisation, oxidation and hydrolysis steps, and fitting using the Exponential-Gaussian-Hybrid model, based on the GC analysis of Entry 1-3 Table 3.

| Step                                                        | Polymerisation  | Oxidation     | Hydrolysis   |
|-------------------------------------------------------------|-----------------|---------------|--------------|
| Distribution                                                | <b>R-Mg</b>     | <b>R-O-Mg</b> | <b>R-O-H</b> |
| sum of GC peaks                                             | ROH + RCHO + RH | ROH + 2 RCHO  | ROH          |
| Step efficiency<br>relative area of EGH fitting             |                 | <b>92.4%</b>  | <b>91.6%</b> |
| R <sup>2</sup> of EGH fitting                               | 0.9987          | 0.9980        | 0.9979       |
| Mn (Carbon number) of EGH fitting                           | <b>29.43</b>    | 29.58         | 29.05        |
| Dispersity of EGH fitting                                   | <b>1.05</b>     | 1.05          | 1.04         |
| Dispersity awaited for a<br>Poisson distribution of same Mn | 1.061           | 1.061         | 1.062        |
| Skewness of EGH fitting                                     | -0.214          | -0.214        | -0.346       |
| Skewness awaited for a<br>Poisson distribution of same Mn   | 0.275           | 0.274         | 0.277        |

S4 continuing, Entry 1-4 Table 3.

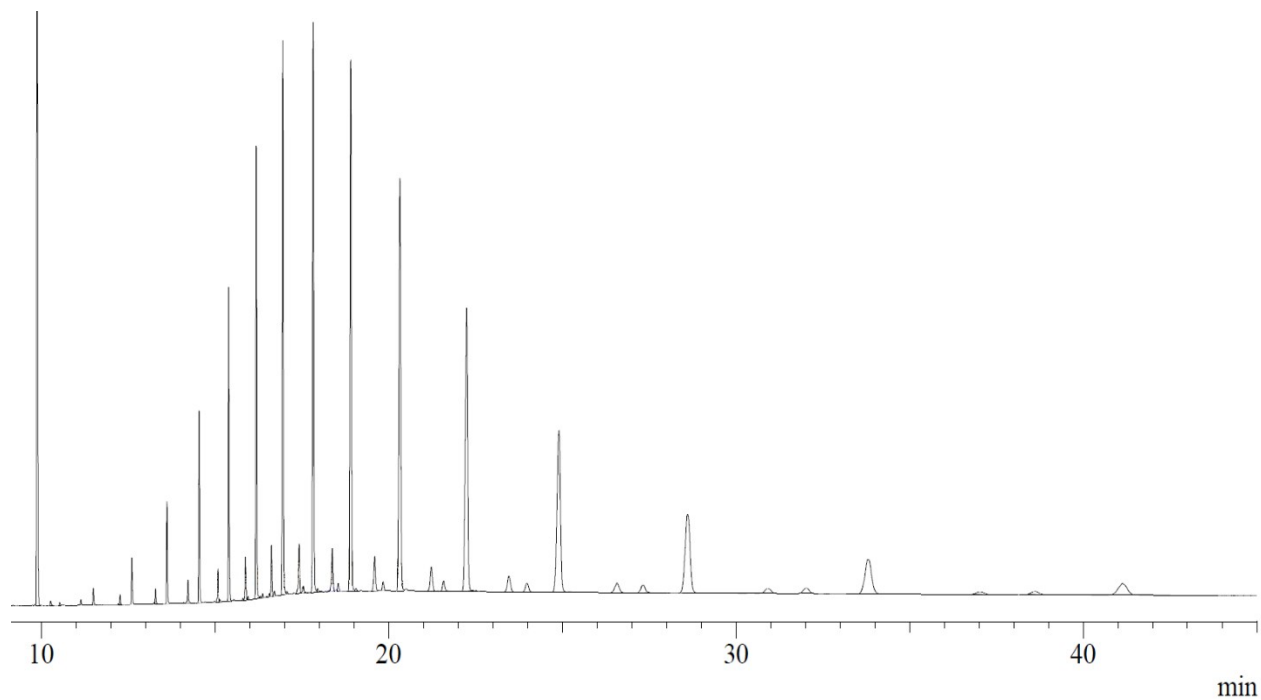

Figure S4-1-4a Raw signal Gas Chromatography analysis Entry 1-4 Table 3.

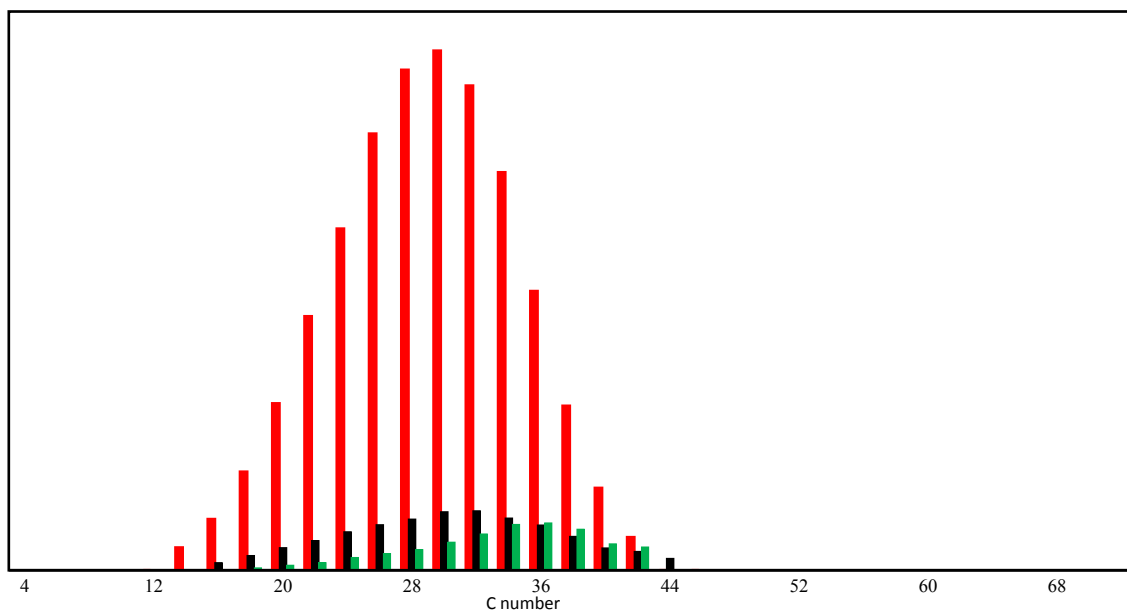

Figure S4-1-4b Distributions of alcohols ROH (red), hydrocarbons RH (black) and aldehydes RCHO (green). Molar amounts calculated from the GC analysis of Entry 1-4 Table 3.

S4 continuing, Entry 1-4 Table 3.

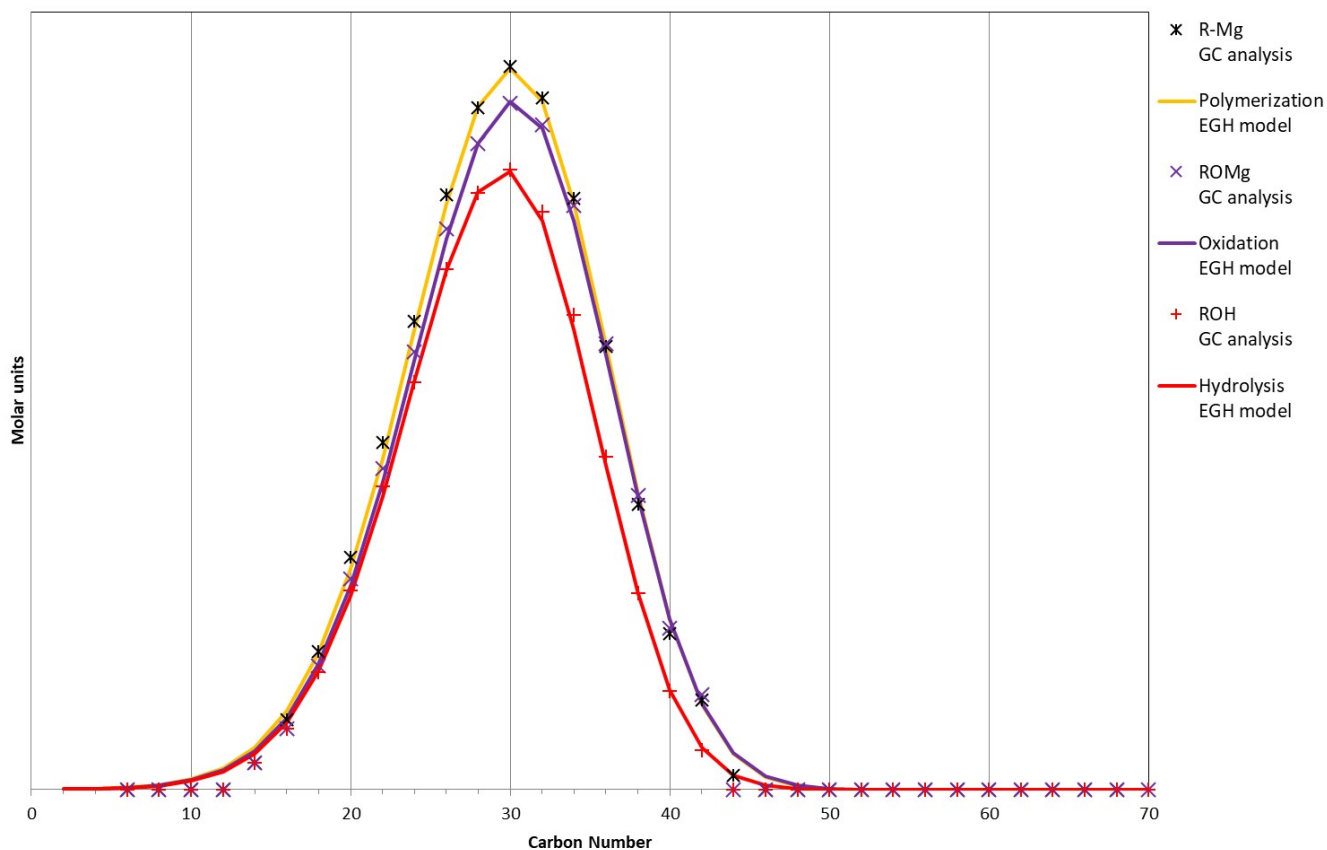

Figure S4-1-4c Distributions (graphics) resulting from polymerisation, oxidation and hydrolysis steps, and fitting using the Exponential-Gaussian-Hybrid model, based on the GC analysis of Entry 1-4 Table 3.

Table S4-1-4 Distributions (numerics) resulting from polymerisation, oxidation and hydrolysis steps, and fitting using the Exponential-Gaussian-Hybrid model, based on the GC analysis of Entry 1-4 Table 3.

| Step                                                        | Polymerisation  | Oxidation     | Hydrolysis   |
|-------------------------------------------------------------|-----------------|---------------|--------------|
| Distribution                                                | <b>R-Mg</b>     | <b>R-O-Mg</b> | <b>R-O-H</b> |
| sum of GC peaks                                             | ROH + RCHO + RH | ROH + 2 RCHO  | ROH          |
| Step efficiency<br>relative area of EGH fitting             |                 | <b>95.4%</b>  | <b>85.6%</b> |
| R <sup>2</sup> of EGH fitting                               | 0.9987          | 0.9988        | 0.9992       |
| Mn (Carbon number) of EGH fitting                           | <b>29.43</b>    | 29.58         | 28.85        |
| Dispersity of EGH fitting                                   | <b>1.05</b>     | 1.05          | 1.04         |
| Dispersity awaited for a<br>Poisson distribution of same Mn | 1.061           | 1.061         | 1.062        |
| Skewness of EGH fitting                                     | -0.214          | -0.214        | -0.250       |
| Skewness awaited for a<br>Poisson distribution of same Mn   | 0.275           | 0.274         | 0.278        |

S4 continuing, Entry 1-5 Table 3.

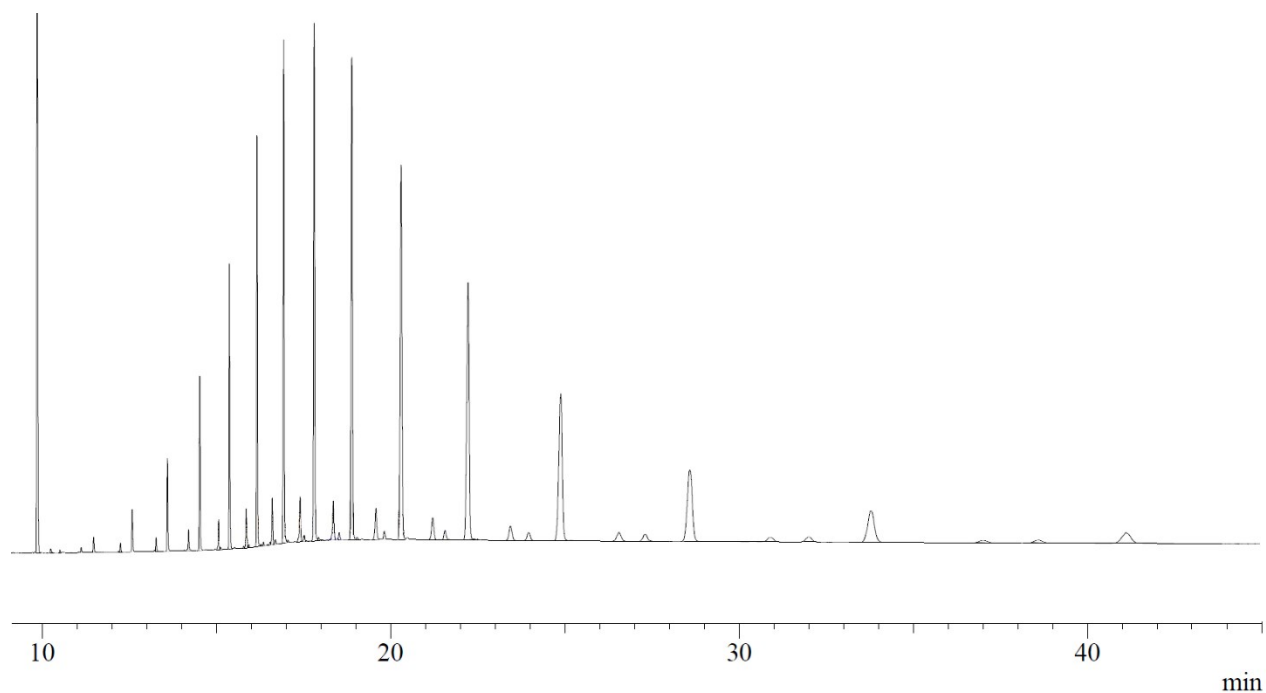

Figure S4-1-5a Raw signal Gas Chromatography analysis Entry 1-5 Table 3.

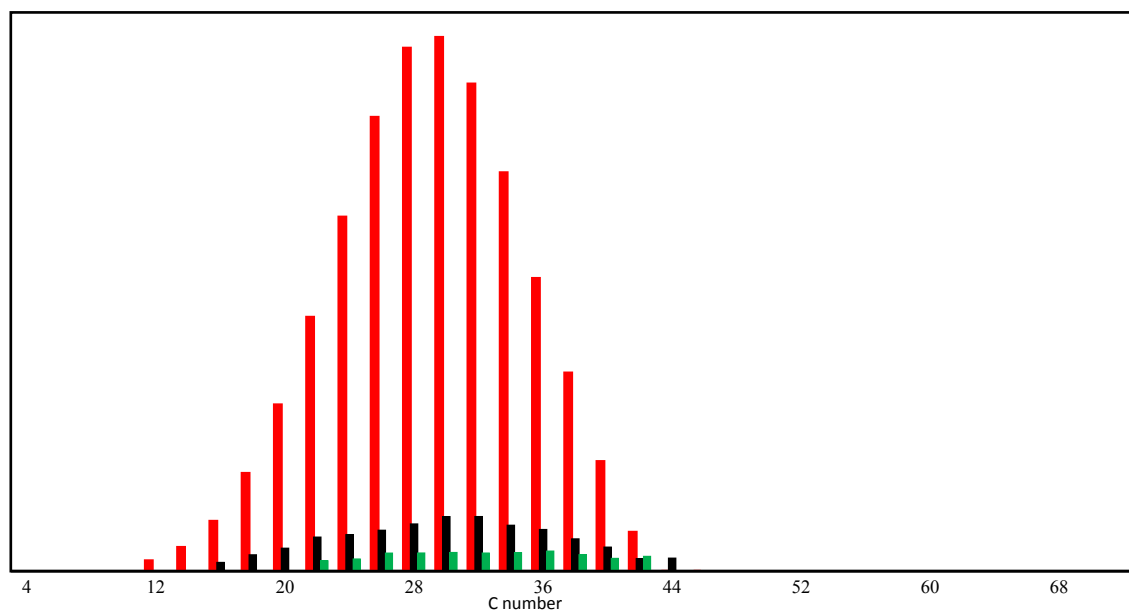

Figure S4-1-5b Distributions of alcohols ROH (red), hydrocarbons RH (black) and aldehydes RCHO (green). Molar amounts calculated from the GC analysis of Entry 1-5 Table 3.



S4 continuing, Entry 1-5 Table 3.

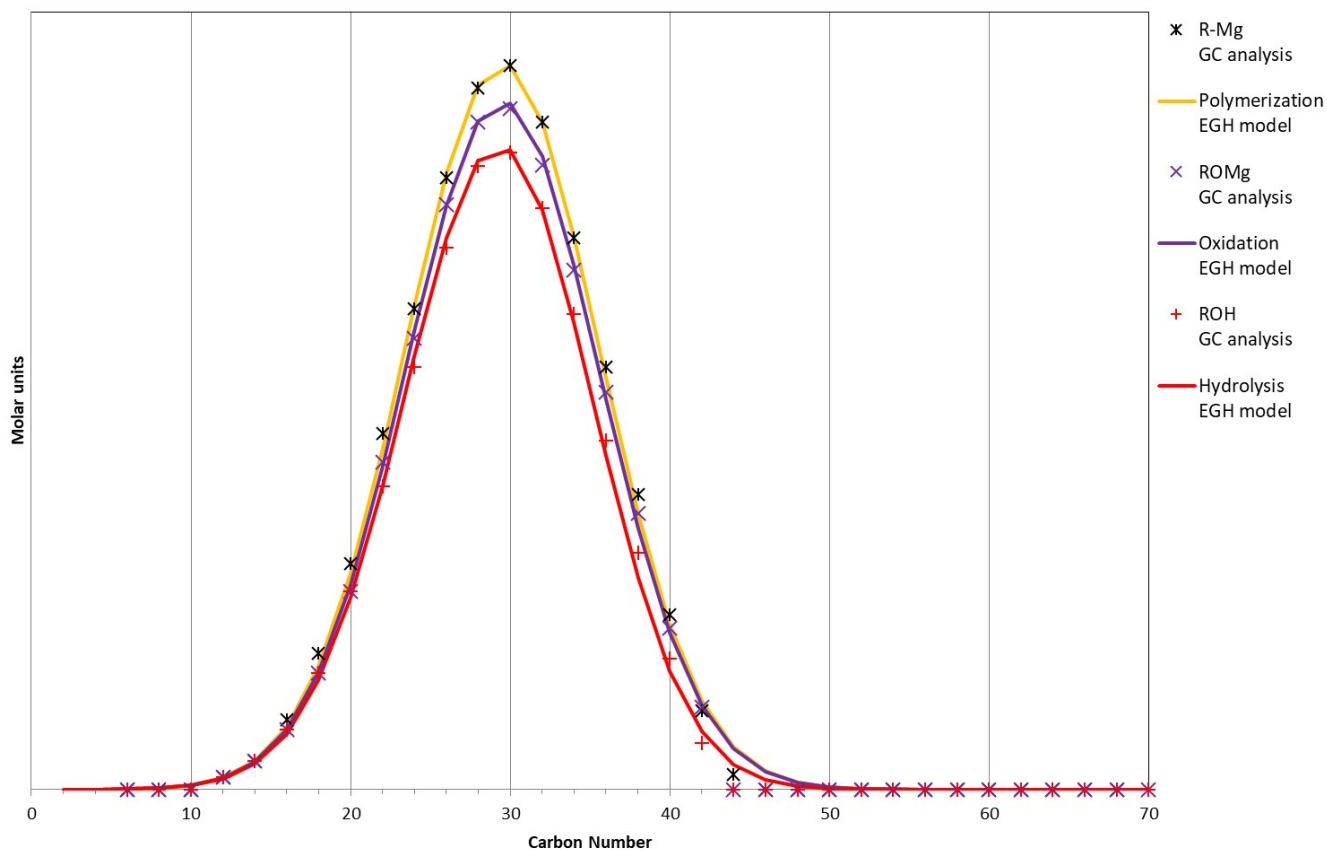

Figure S4-1-5c Distributions (graphics) resulting from polymerisation, oxidation and hydrolysis steps, and fitting using the Exponential-Gaussian-Hybrid model, based on the GC analysis of Entry 1-5 Table 3.

Table S4-1-5 Distributions (numerics) resulting from polymerisation, oxidation and hydrolysis steps, and fitting using the Exponential-Gaussian-Hybrid model, based on the GC analysis of Entry 1-5 Table 3.

| Step                                                        | Polymerisation                 | Oxidation                     | Hydrolysis          |
|-------------------------------------------------------------|--------------------------------|-------------------------------|---------------------|
| Distribution<br>sum of GC peaks                             | <b>R-Mg</b><br>ROH + RCHO + RH | <b>R-O-Mg</b><br>ROH + 2 RCHO | <b>R-O-H</b><br>ROH |
| Step efficiency<br>relative area of EGH fitting             |                                | <b>94.8%</b>                  | <b>90.5%</b>        |
| R <sup>2</sup> of EGH fitting                               | 0.9985                         | 0.9995                        | 0.9981              |
| Mn (Carbon number) of EGH fitting                           | <b>29.50</b>                   | 29.50                         | 29.15               |
| Dispersity of EGH fitting                                   | <b>1.04</b>                    | 1.04                          | 1.04                |
| Dispersity awaited for a<br>Poisson distribution of same Mn | 1.061                          | 1.061                         | 1.062               |
| Skewness of EGH fitting                                     | 0.000                          | 0.000                         | -0.051              |
| Skewness awaited for a<br>Poisson distribution of same Mn   | 0.275                          | 0.275                         | 0.277               |

S4 continuing, Entry 1-5 Table 3.

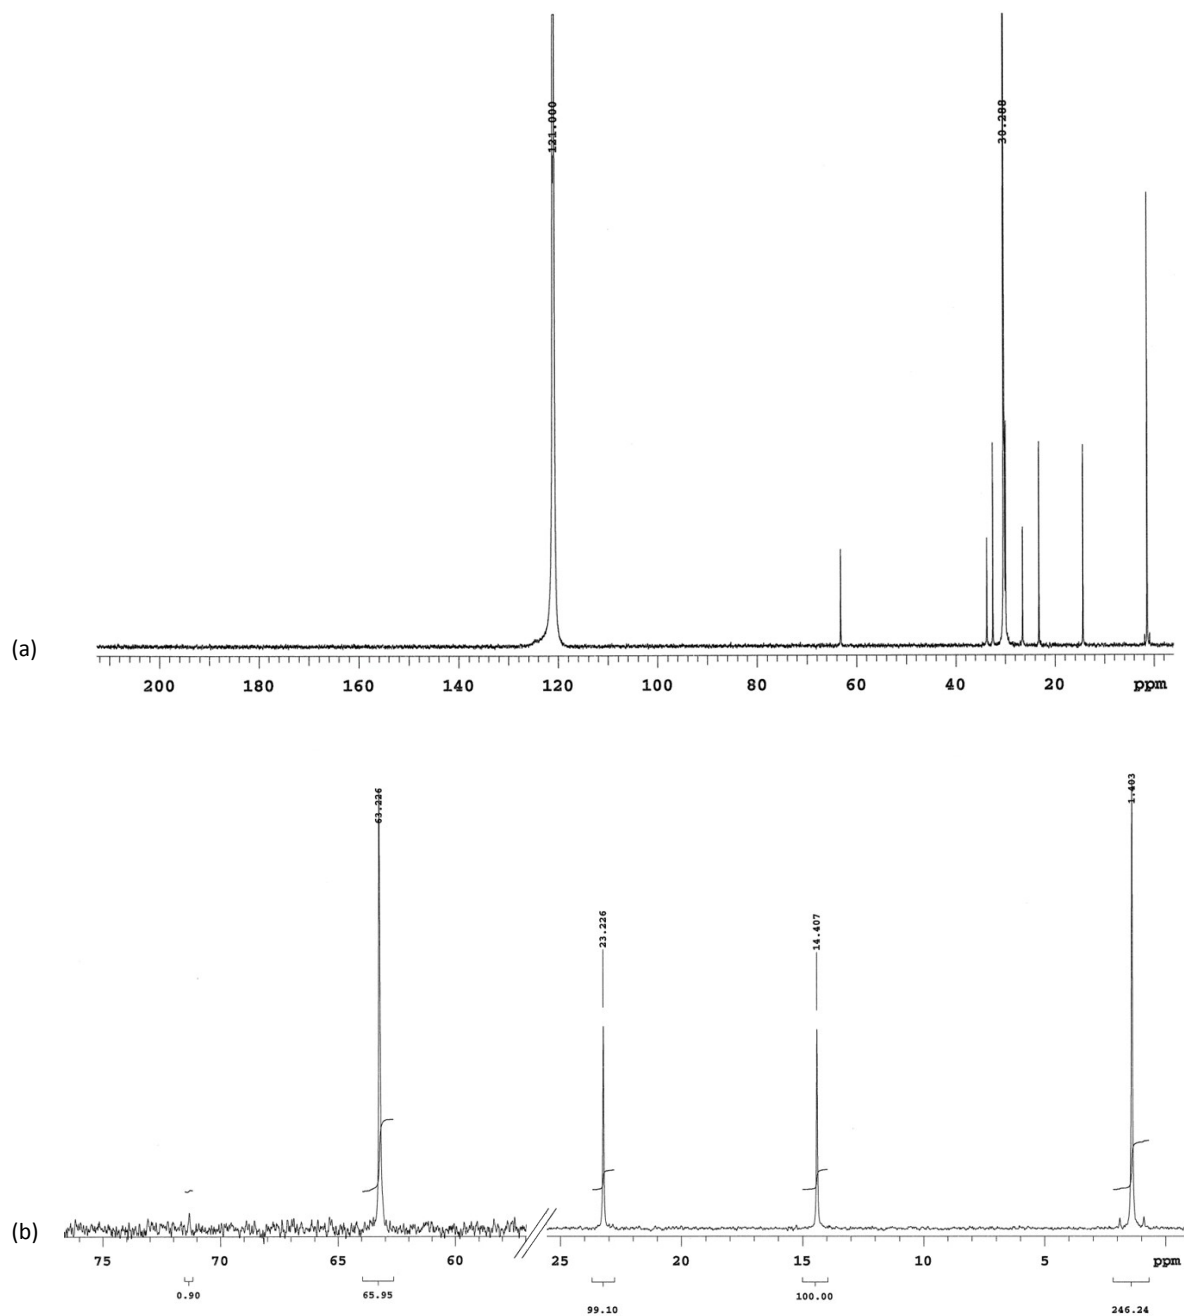

Figure S4-1-5d  $^{13}\text{C}$  NMR spectrum (solvent  $\text{Cl}_2\text{C}=\text{CCl}_2$ , in the presence of  $\text{Cr}(\text{acac})_3$ ,  $\text{D}_2\text{O}$  capillary lock, 368 K) of Entry 1-5 Table 3. Full range (a) and selected zone for integration (b). ROH % = 80.0 %

S4 continuing, Entry 1-6 Table 3.

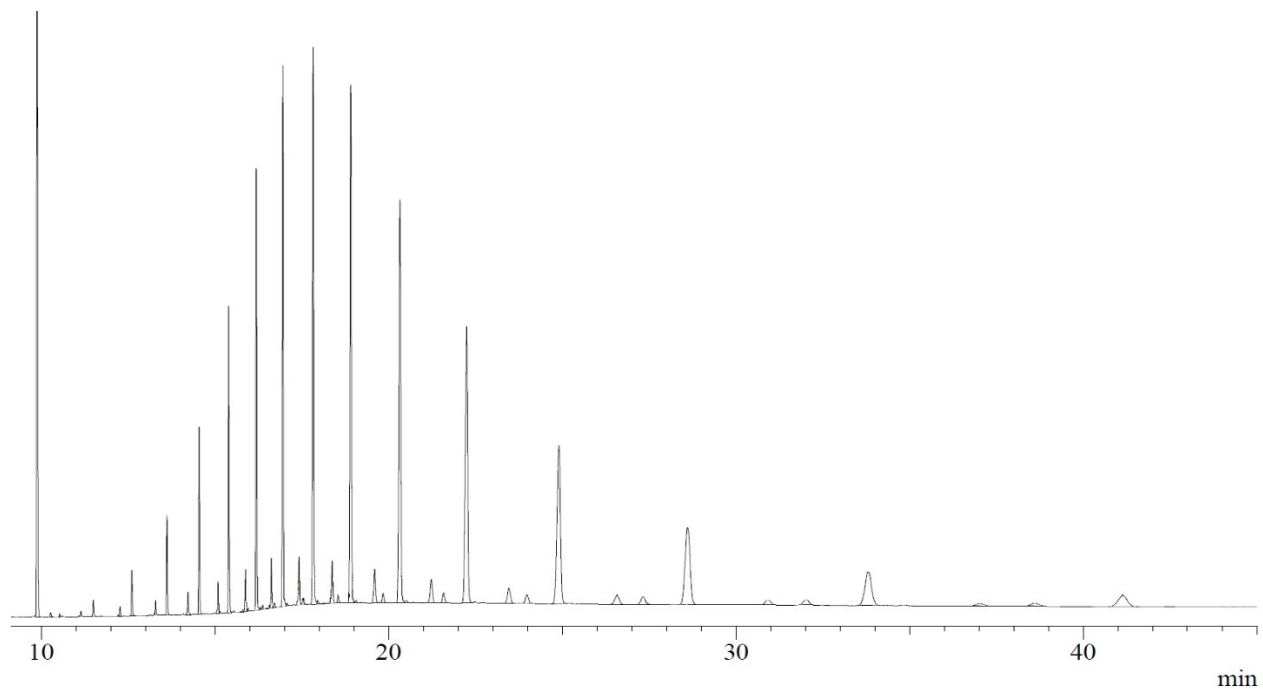

Figure S4-1-6a Raw signal Gas Chromatography analysis Entry 1-6 Table 3.

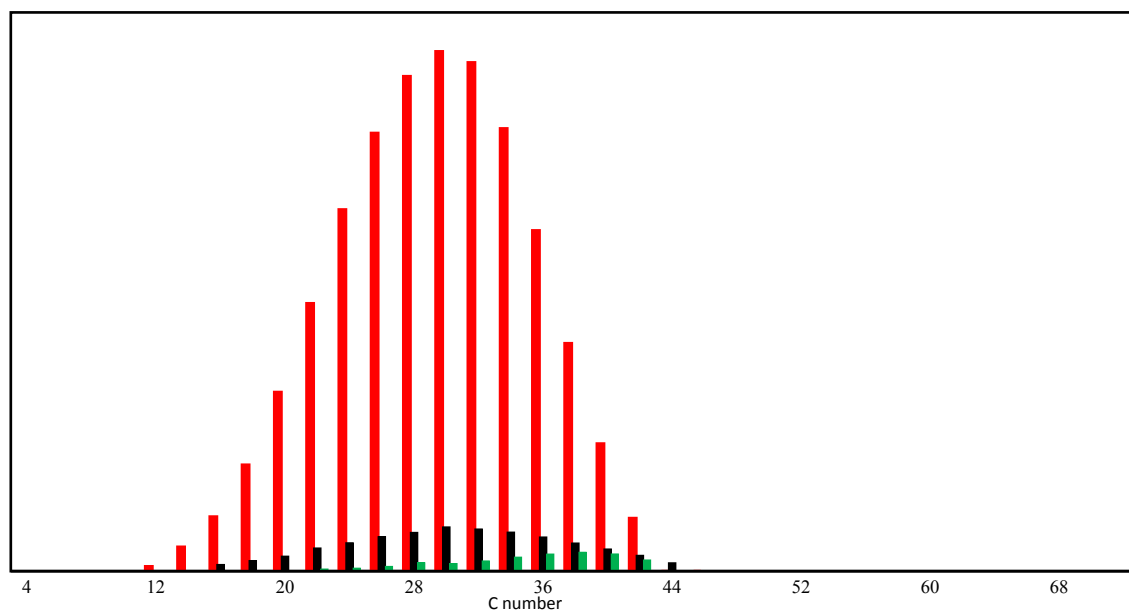

Figure S4-1-6b Distributions of alcohols ROH (red), hydrocarbons RH (black) and aldehydes RCHO (green). Molar amounts calculated from the GC analysis of Entry 1-6 Table 3.

S4 continuing, Entry 1-6 Table 3.

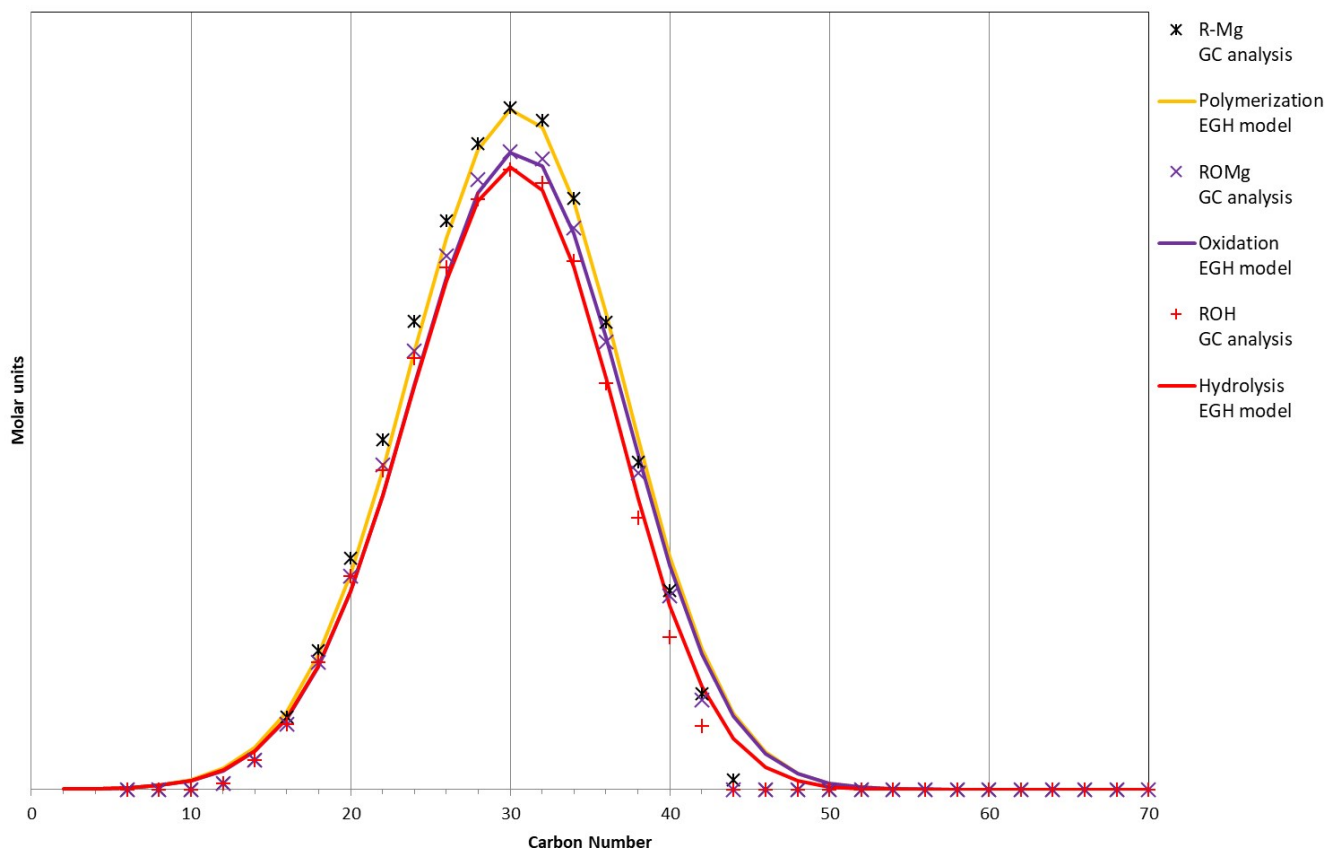

Figure S4-1-6c Distributions (graphics) resulting from polymerisation, oxidation and hydrolysis steps, and fitting using the Exponential-Gaussian-Hybrid model, based on the GC analysis of Entry 1-6 Table 3.

Table S4-1-6 Distributions (numerics) resulting from polymerisation, oxidation and hydrolysis steps, and fitting using the Exponential-Gaussian-Hybrid model, based on the GC analysis of Entry 1-6 Table 3.

| Step                                                        | Polymerisation                 | Oxidation                     | Hydrolysis          |
|-------------------------------------------------------------|--------------------------------|-------------------------------|---------------------|
| Distribution<br>sum of GC peaks                             | <b>R-Mg</b><br>ROH + RCHO + RH | <b>R-O-Mg</b><br>ROH + 2 RCHO | <b>R-O-H</b><br>ROH |
| Step efficiency<br>relative area of EGH fitting             |                                | <b>93.8%</b>                  | <b>94.6%</b>        |
| R <sup>2</sup> of EGH fitting                               | 0.9912                         | 0.9927                        | 0.9937              |
| Mn (Carbon number) of EGH fitting                           | <b>30.10</b>                   | 30.20                         | 29.75               |
| Dispersity of EGH fitting                                   | <b>1.05</b>                    | 1.05                          | 1.05                |
| Dispersity awaited for a<br>Poisson distribution of same Mn | 1.060                          | 1.060                         | 1.060               |
| Skewness of EGH fitting                                     | -0.088                         | -0.088                        | -0.136              |
| Skewness awaited for a<br>Poisson distribution of same Mn   | 0.272                          | 0.271                         | 0.273               |

S4 continuing, Entry 1-6 Table 3.

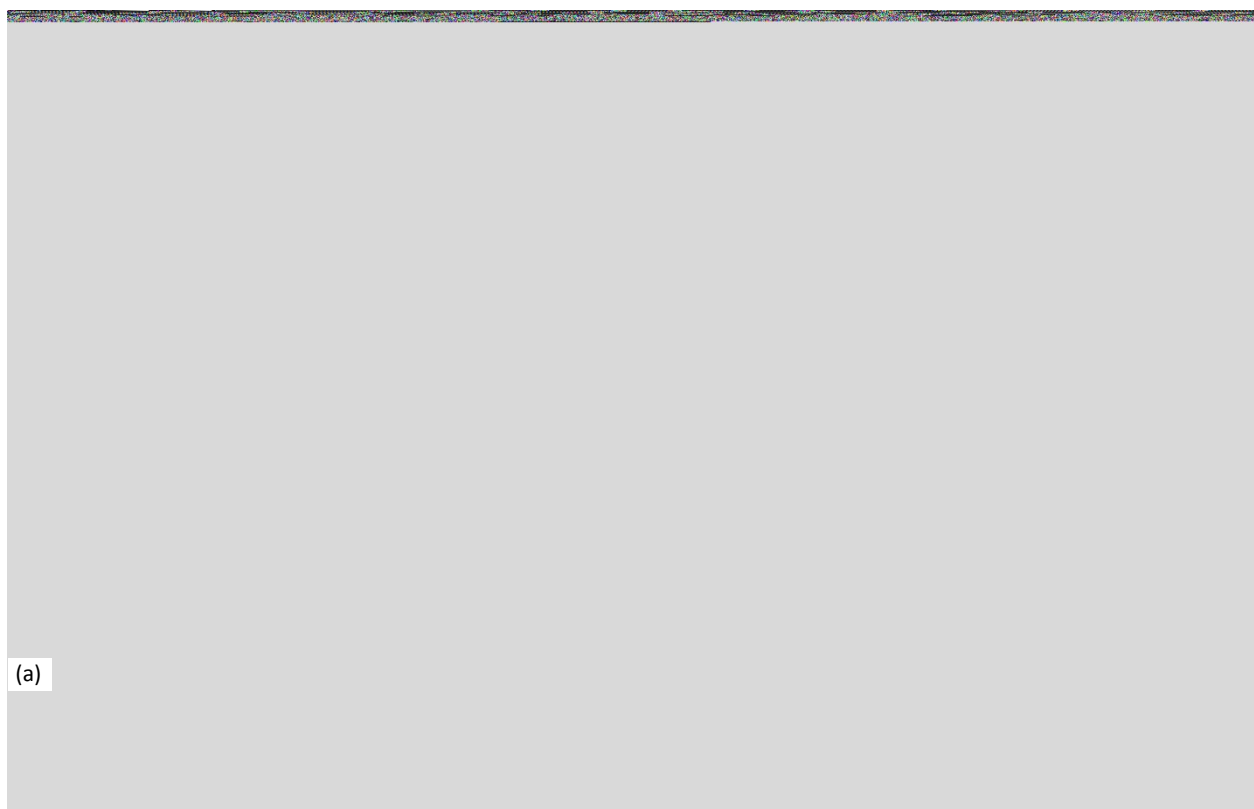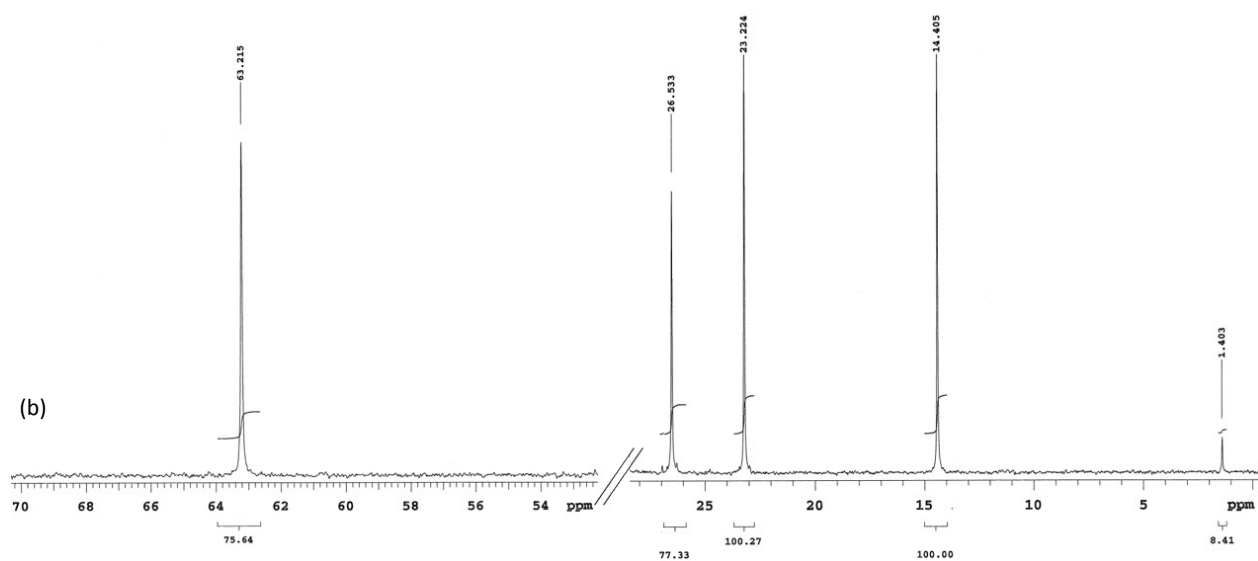

Figure S4-1-6d  $^{13}\text{C}$  NMR spectrum (solvent  $\text{Cl}_2\text{C}=\text{CCl}_2$ , in the presence of  $\text{Cr}(\text{acac})_3$ ,  $\text{D}_2\text{O}$  capillary lock, 368 K) of Entry 1-6 Table 3. Full range (a) and selected zone for integration (b). ROH % = 86.0 %

S4 continuing, Entry 2 Table 3.

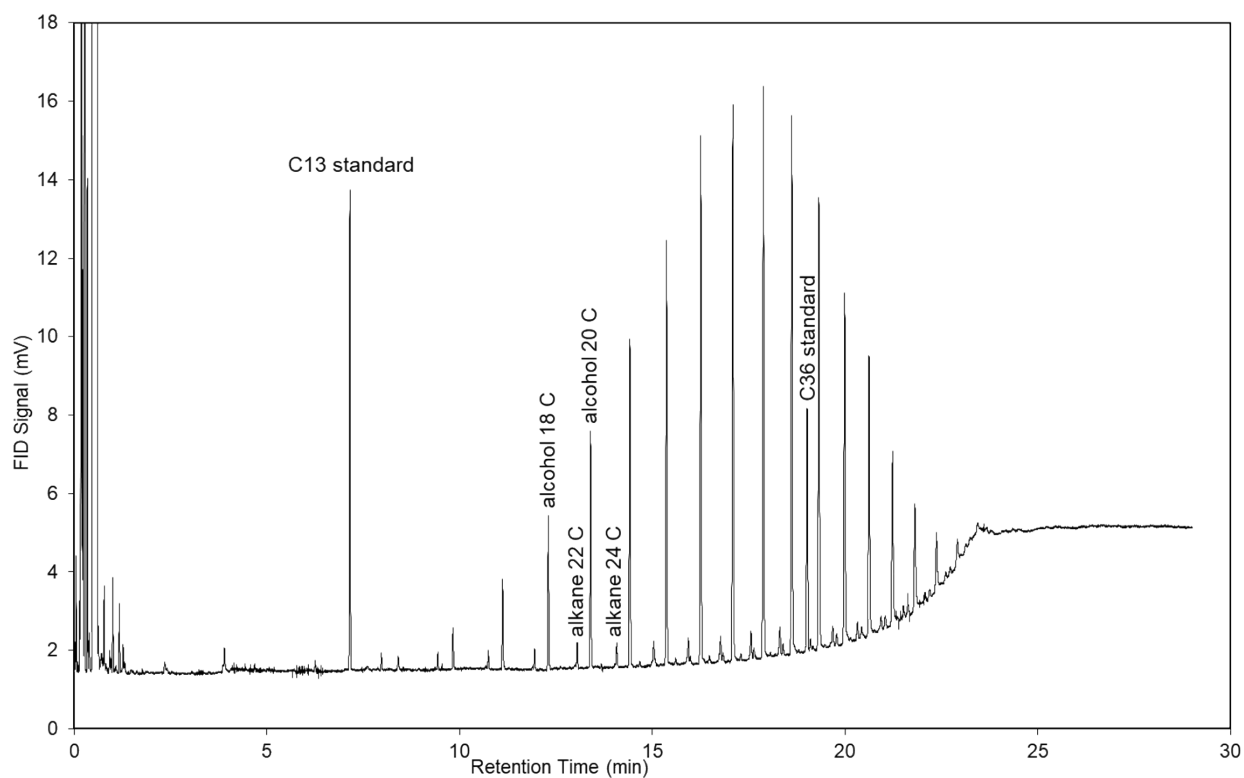

Figure S4-2a Raw signal Gas Chromatography analysis Entry 2 Table 3.

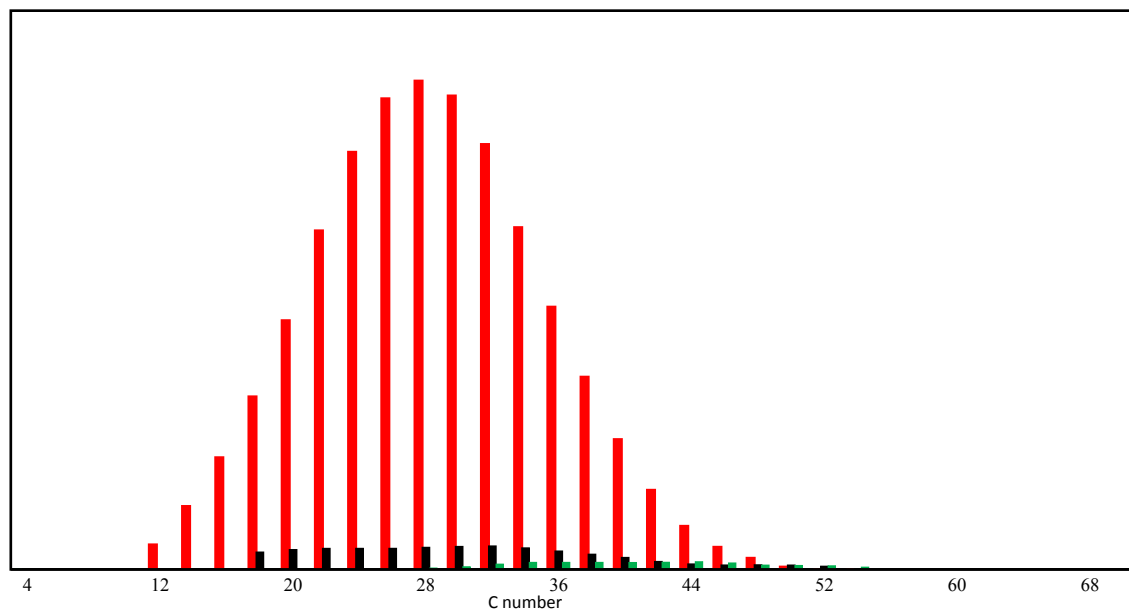

Figure S4-2b Distributions of alcohols ROH (red), hydrocarbons RH (black) and aldehydes RCHO (green). Molar amounts calculated from the GC analysis of Entry 2 Table 3.

S4 continuing, Entry 2 Table 3.

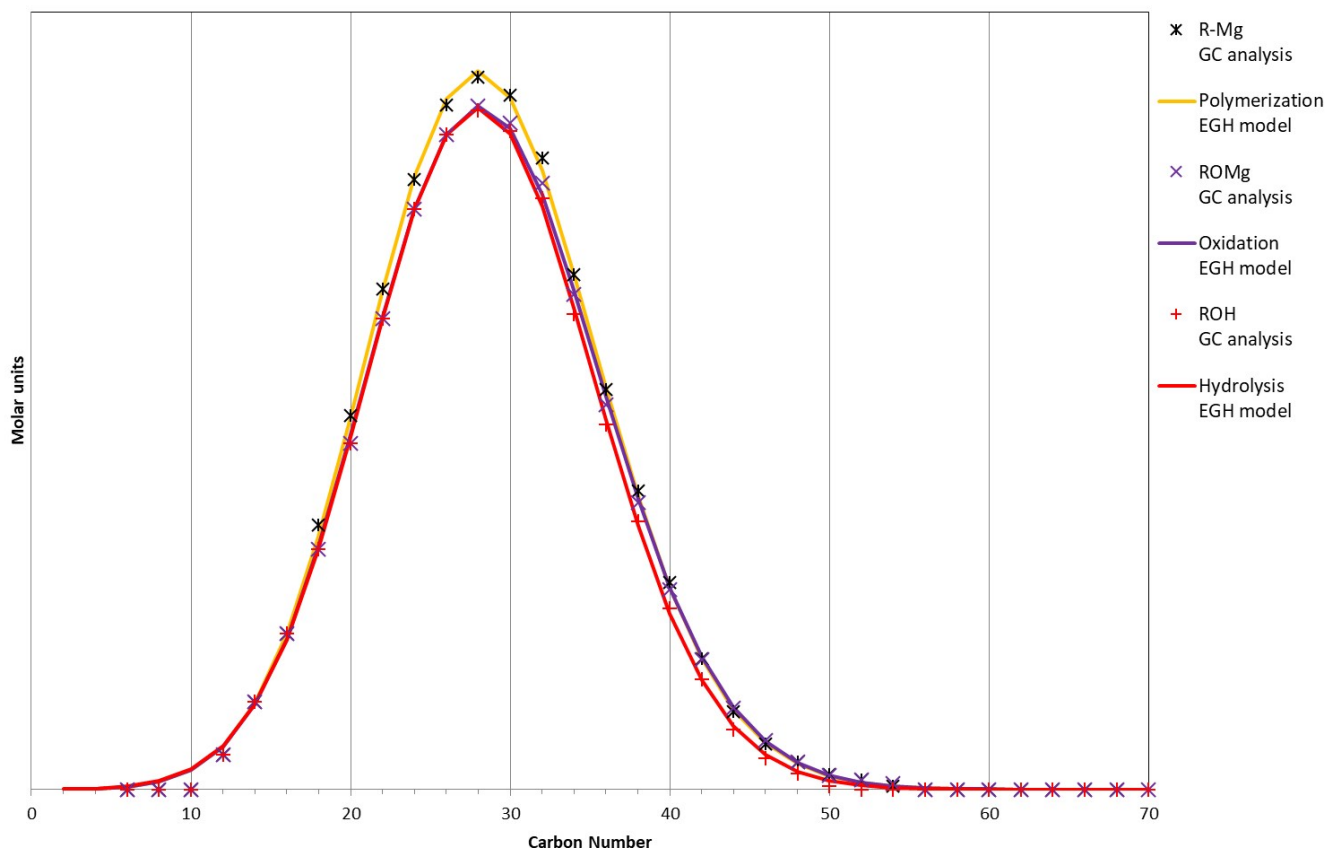

Figure S4-2c Distributions (graphics) resulting from polymerisation, oxidation and hydrolysis steps, and fitting using the Exponential-Gaussian-Hybrid model, based on the GC analysis of Entry 2 Table 3.

Table S4-2 Distributions (numerics) resulting from polymerisation, oxidation and hydrolysis steps, and fitting using the Exponential-Gaussian-Hybrid model, based on the GC analysis of Entry 2 Table 3.

| Step                                                        | Polymerisation  | Oxidation     | Hydrolysis   |
|-------------------------------------------------------------|-----------------|---------------|--------------|
| Distribution                                                | <b>R-Mg</b>     | <b>R-O-Mg</b> | <b>R-O-H</b> |
| sum of GC peaks                                             | ROH + RCHO + RH | ROH + 2 RCHO  | ROH          |
| Step efficiency<br>relative area of EGH fitting             |                 | <b>96.4%</b>  | <b>96.9%</b> |
| R <sup>2</sup> of EGH fitting                               | 0.9996          | 0.9996        | 0.9997       |
| Mn (Carbon number) of EGH fitting                           | <b>28.60</b>    | 28.70         | 28.35        |
| Dispersity of EGH fitting                                   | <b>1.06</b>     | 1.07          | 1.06         |
| Dispersity awaited for a<br>Poisson distribution of same Mn | 1.063           | 1.062         | 1.063        |
| Skewness of EGH fitting                                     | 0.167           | 0.165         | 0.100        |
| Skewness awaited for a<br>Poisson distribution of same Mn   | 0.280           | 0.279         | 0.281        |

S4 continuing, Entry 3 Table 3.

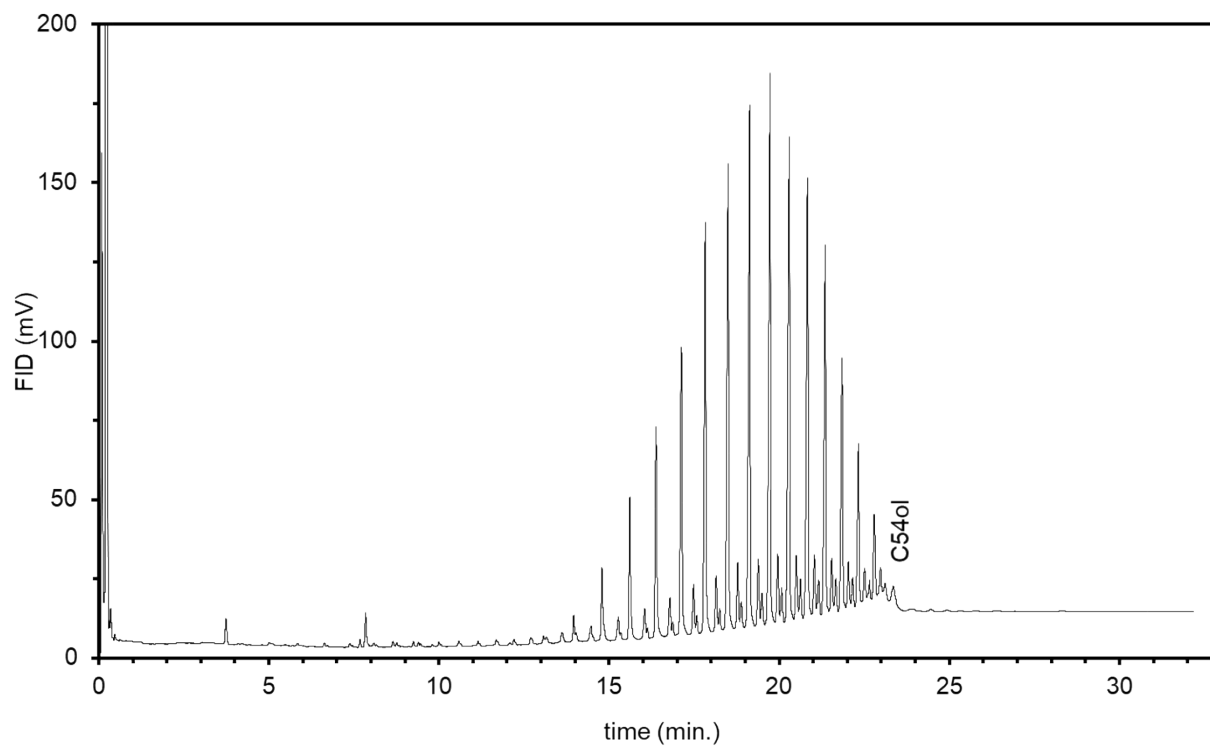

Figure S4-3a Raw signal Gas Chromatography analysis Entry 3 Table 3.

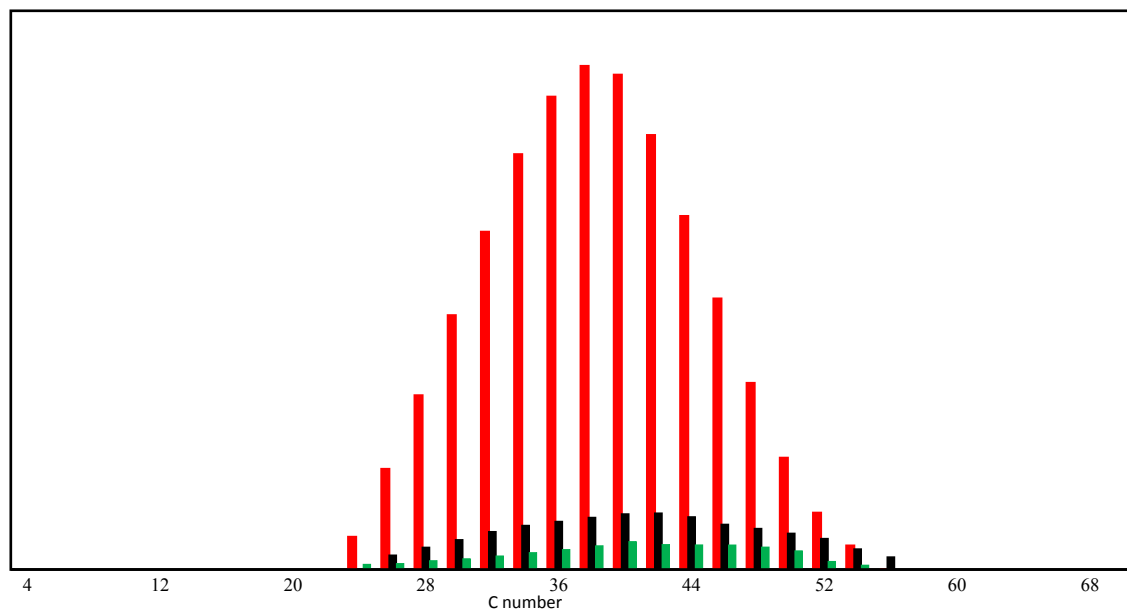

Figure S4-3b Distributions of alcohols ROH (red), hydrocarbons RH (black) and aldehydes RCHO (green). Molar amounts calculated from the GC analysis of Entry 3 Table 3.



S4 continuing, Entry 3 Table 3.

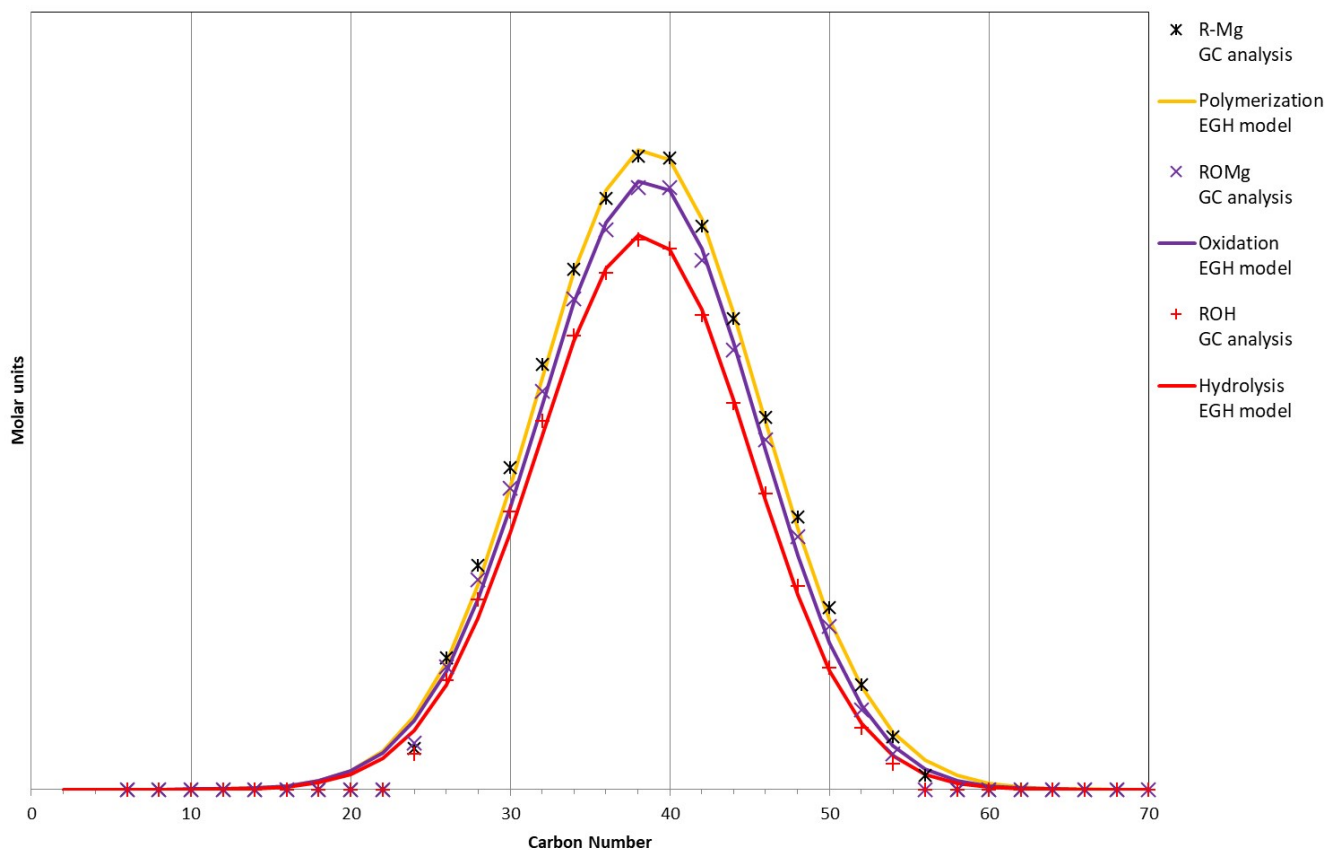

Figure S4-3c Distributions (graphics) resulting from polymerisation, oxidation and hydrolysis steps, and fitting using the Exponential-Gaussian-Hybrid model, based on the GC analysis of Entry 3 Table 3.

Table S4-3 Distributions (numerics) resulting from polymerisation, oxidation and hydrolysis steps, and fitting using the Exponential-Gaussian-Hybrid model, based on the GC analysis of Entry 3 Table 3.

| Step                                                        | Polymerisation  | Oxidation     | Hydrolysis   |
|-------------------------------------------------------------|-----------------|---------------|--------------|
| Distribution                                                | <b>R-Mg</b>     | <b>R-O-Mg</b> | <b>R-O-H</b> |
| sum of GC peaks                                             | ROH + RCHO + RH | ROH + 2 RCHO  | ROH          |
| Step efficiency<br>relative area of EGH fitting             |                 | <b>93.1%</b>  | <b>88.9%</b> |
| R <sup>2</sup> of EGH fitting                               | 0.9969          | 0.9960        | 0.9964       |
| Mn (Carbon number) of EGH fitting                           | <b>38.60</b>    | 38.42         | 38.25        |
| Dispersity of EGH fitting                                   | <b>1.03</b>     | 1.03          | 1.03         |
| Dispersity awaited for a<br>Poisson distribution of same Mn | 1.048           | 1.048         | 1.048        |
| Skewness of EGH fitting                                     | 0.000           | -0.066        | -0.045       |
| Skewness awaited for a<br>Poisson distribution of same Mn   | 0.237           | 0.238         | 0.238        |

S4 continuing, Entry 3 Table 3.

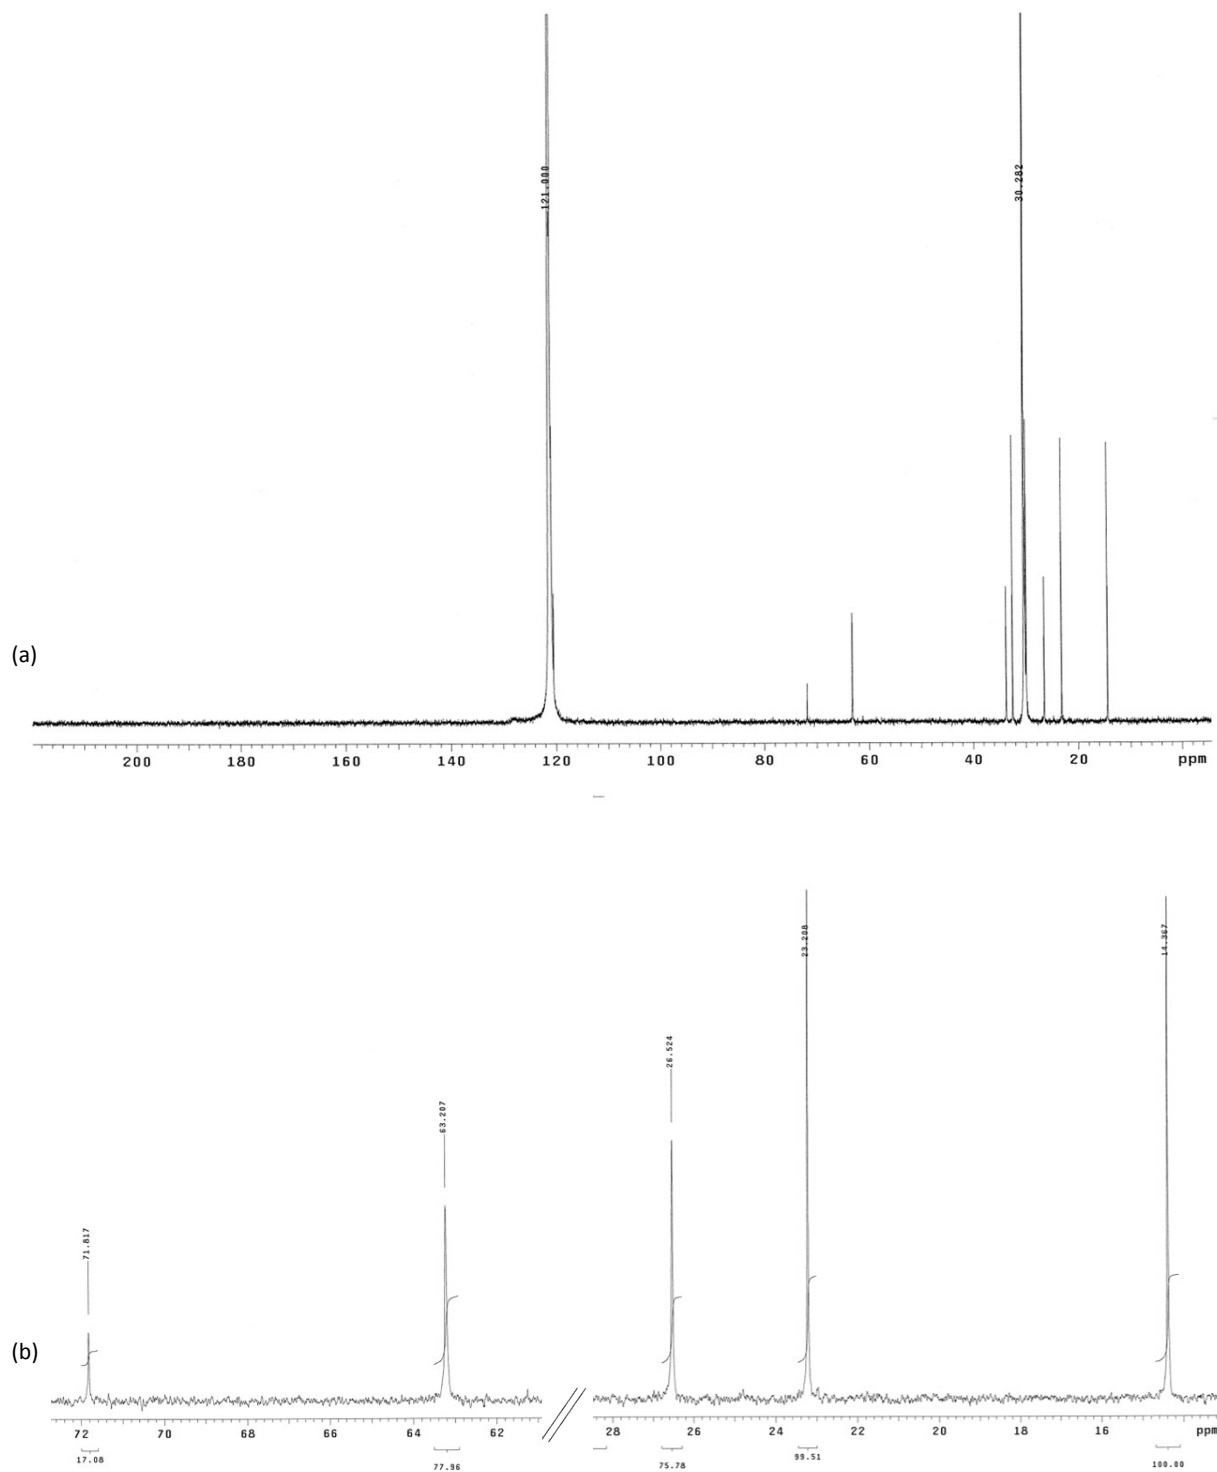

Figure S4-3d  $^{13}\text{C}$  NMR spectrum (solvent  $\text{Cl}_2\text{C}=\text{CCl}_2$ , in the presence of  $\text{Cr}(\text{acac})_3$ ,  $\text{D}_2\text{O}$  capillary lock, 376 K, ether residue at *ca.* 70 ppm) of Entry 3 Table 3. Full range (a) and selected zone for integration (b). ROH % = 87.9 %

S4 continuing, Entry 4 Table 3.

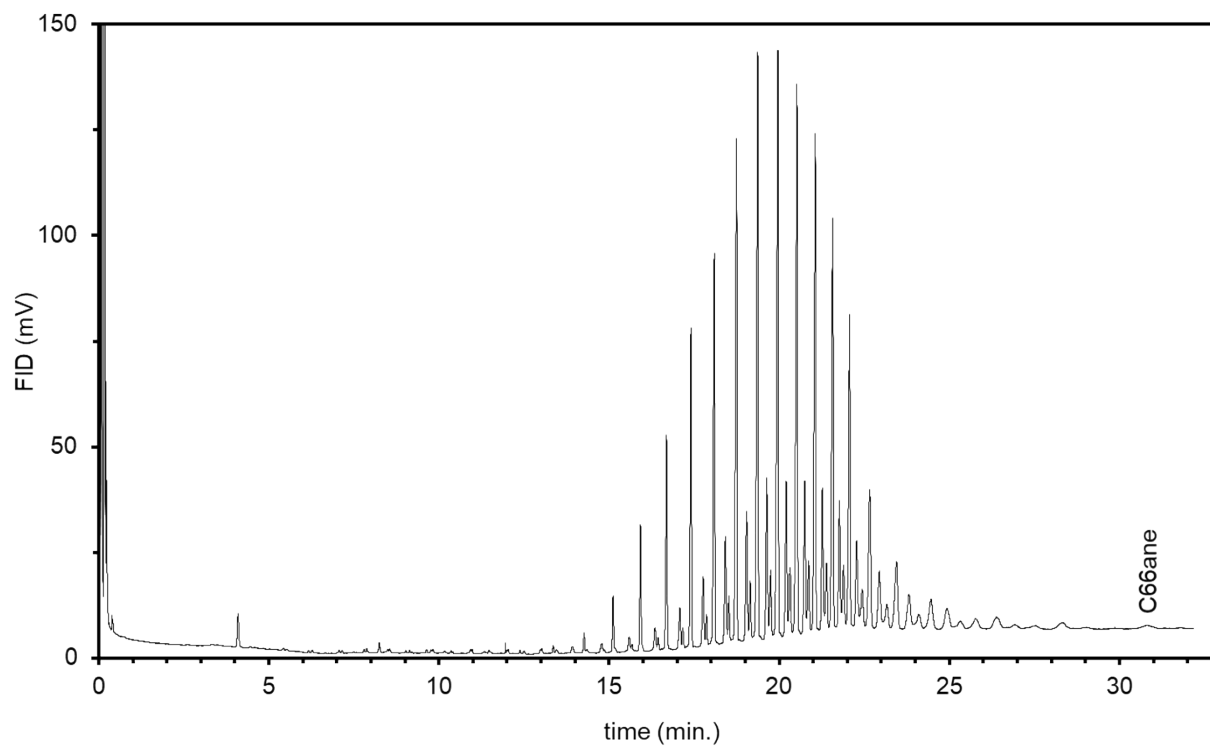

Figure S4-4a Raw signal Gas Chromatography analysis Entry 4 Table 3.

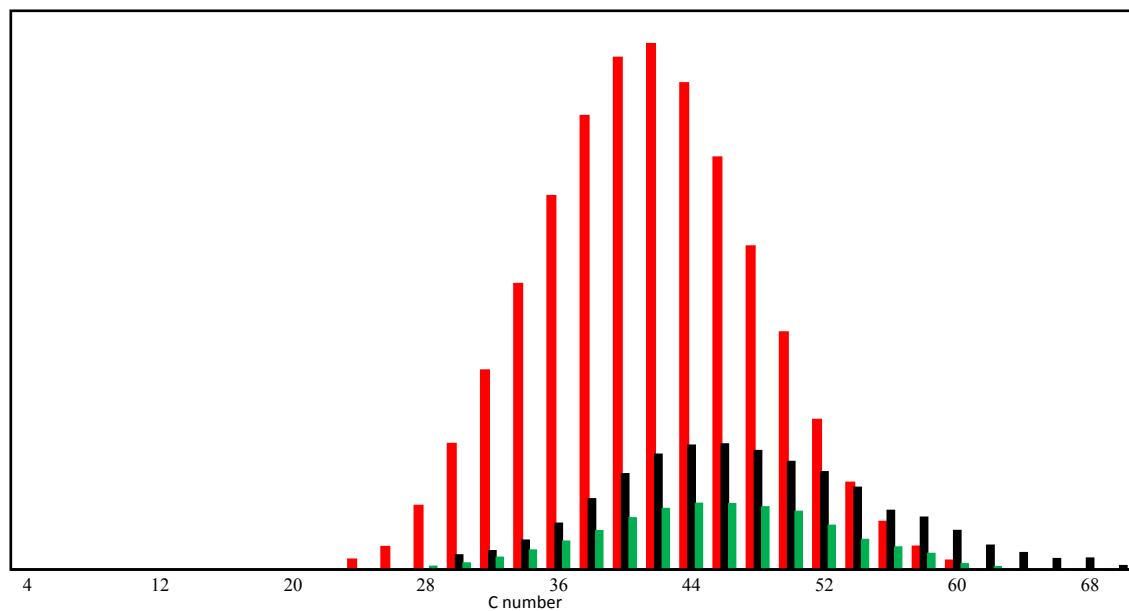

Figure S4-4b Distributions of alcohols ROH (red), hydrocarbons RH (black) and aldehydes RCHO (green). Molar amounts calculated from the GC analysis of Entry 4 Table 3.

S4 continuing, Entry 4 Table 3.

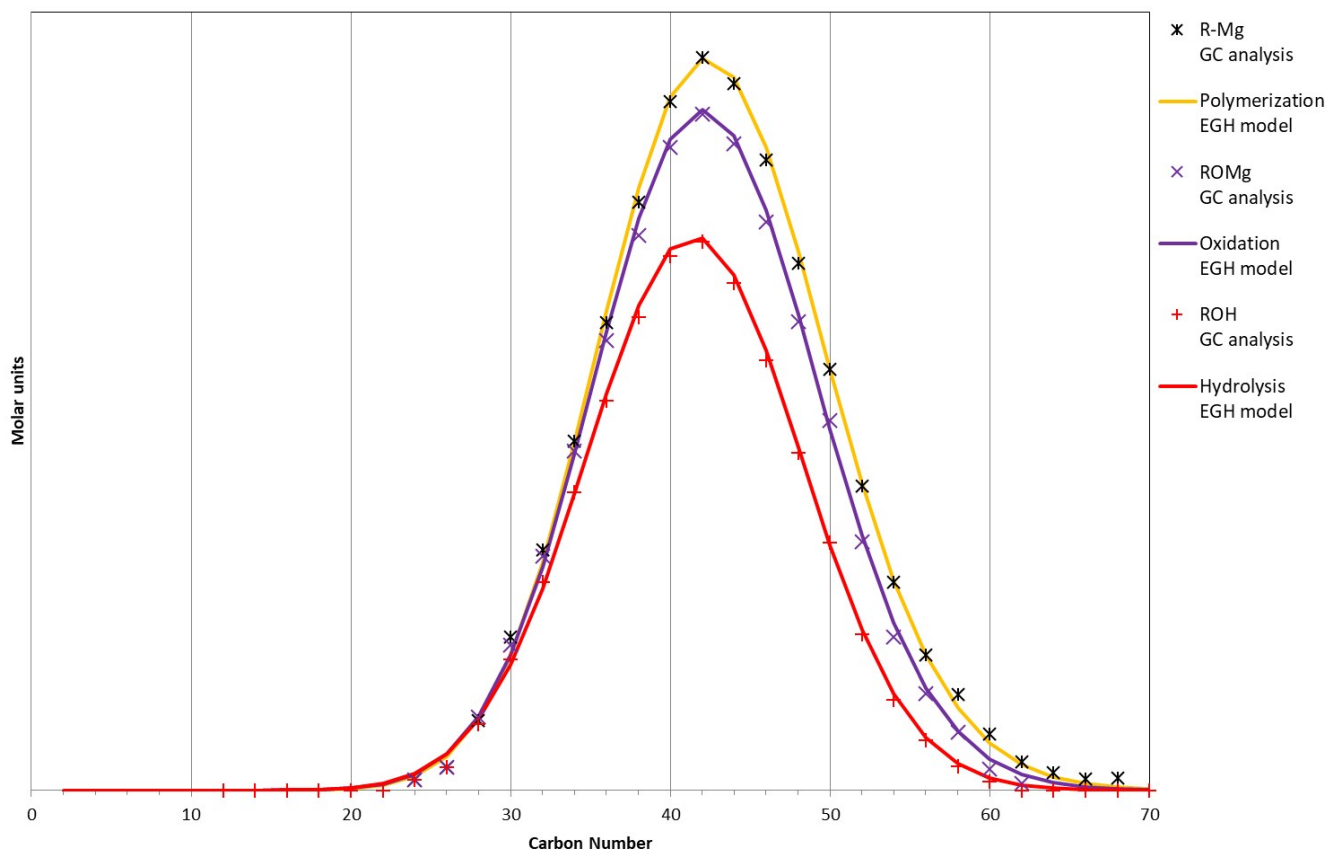

Figure S4-4c Distributions (graphics) resulting from polymerisation, oxidation and hydrolysis steps, and fitting using the Exponential-Gaussian-Hybrid model, based on the GC analysis of Entry 4 Table 3.

Table S4-4 Distributions (numerics) resulting from polymerisation, oxidation and hydrolysis steps, and fitting using the Exponential-Gaussian-Hybrid model, based on the GC analysis of Entry 4 Table 3.

| Step                                                        | Polymerisation                 | Oxidation                     | Hydrolysis          |
|-------------------------------------------------------------|--------------------------------|-------------------------------|---------------------|
| Distribution<br>sum of GC peaks                             | <b>R-Mg</b><br>ROH + RCHO + RH | <b>R-O-Mg</b><br>ROH + 2 RCHO | <b>R-O-H</b><br>ROH |
| Step efficiency<br>relative area of EGH fitting             |                                | <b>91.0%</b>                  | <b>78.4%</b>        |
| R <sup>2</sup> of EGH fitting                               | 0.9989                         | 0.9985                        | 0.9988              |
| Mn (Carbon number) of EGH fitting                           | <b>42.93</b>                   | 42.43                         | 41.51               |
| Dispersity of EGH fitting                                   | <b>1.03</b>                    | 1.03                          | 1.03                |
| Dispersity awaited for a<br>Poisson distribution of same Mn | 1.043                          | 1.044                         | 1.045               |
| Skewness of EGH fitting                                     | 0.168                          | 0.108                         | 0.018               |
| Skewness awaited for a<br>Poisson distribution of same Mn   | 0.224                          | 0.225                         | 0.228               |

S4 continuing, Entry 4 Table 3.

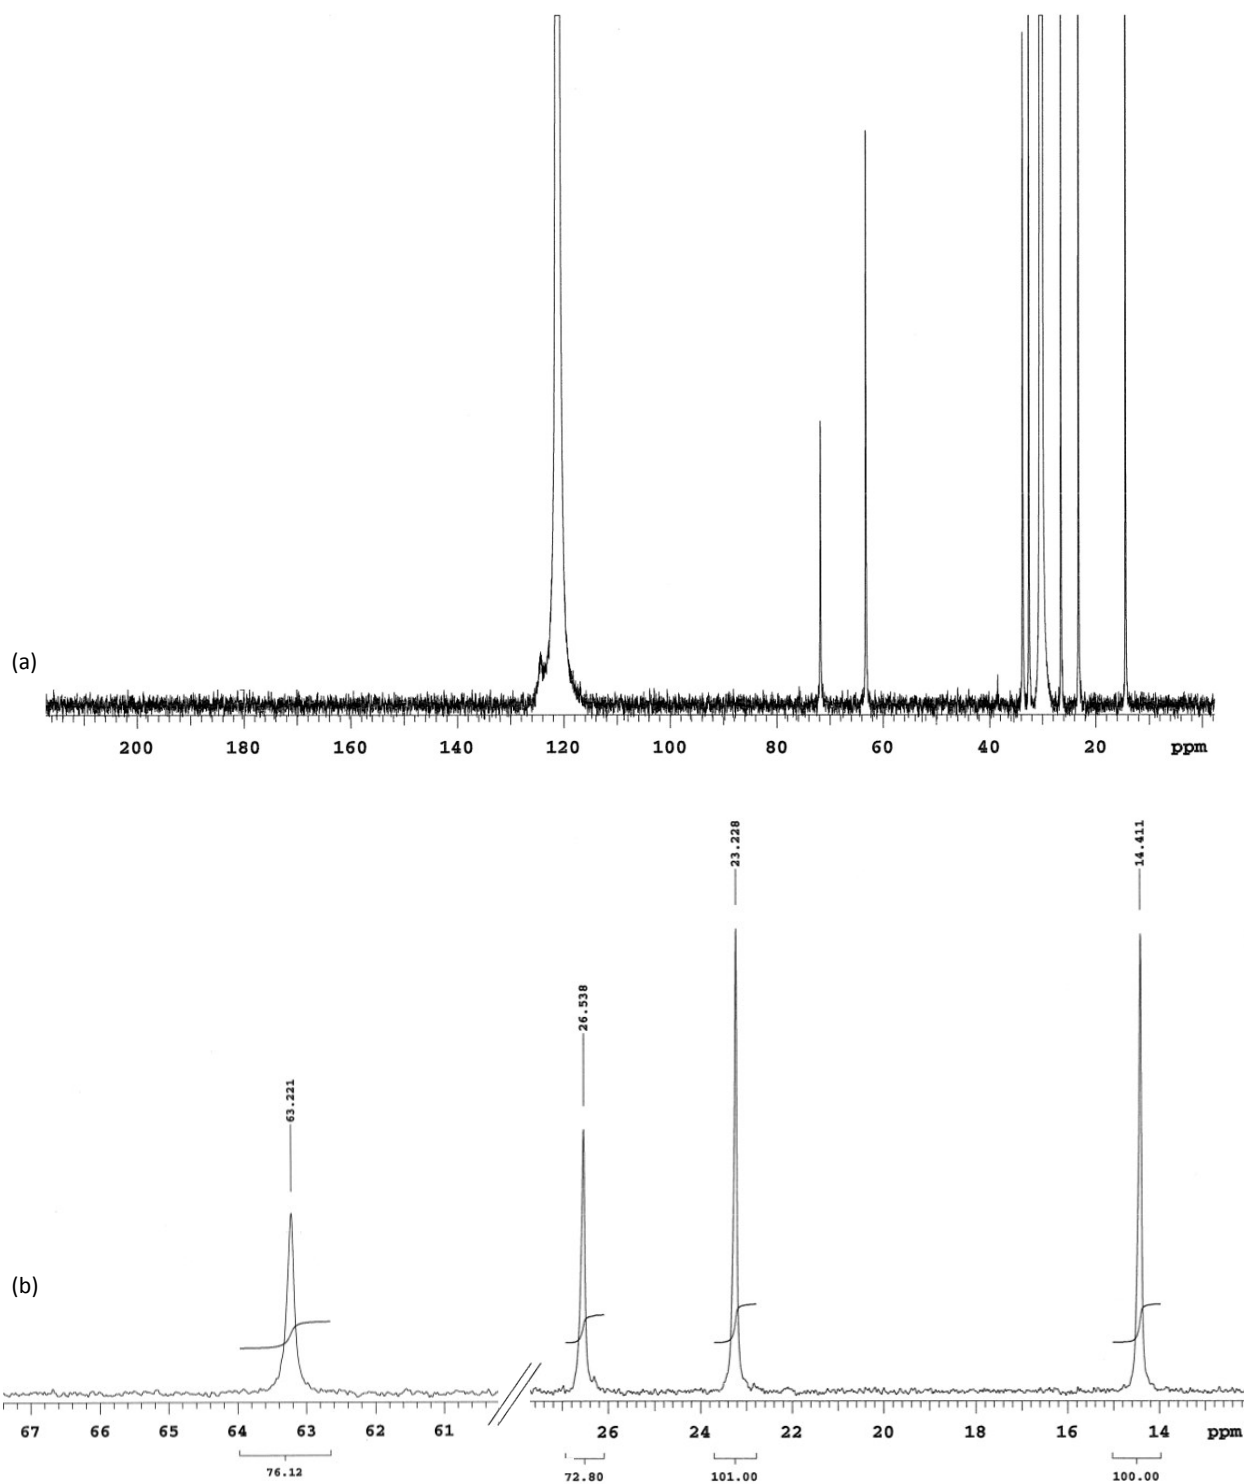

Figure S4-4d  $^{13}\text{C}$  NMR spectrum (solvent  $\text{Cl}_2\text{C}=\text{CCl}_2$ , in the presence of  $\text{Cr}(\text{acac})_3$ ,  $\text{D}_2\text{O}$  capillary lock, 368 K, ether residue at *ca.* 70 ppm) of Entry 4 Table 3. Full range (a) and selected zone for integration (b). ROH % = 86.0 %

S4 continuing, Entry 5 Table 3.

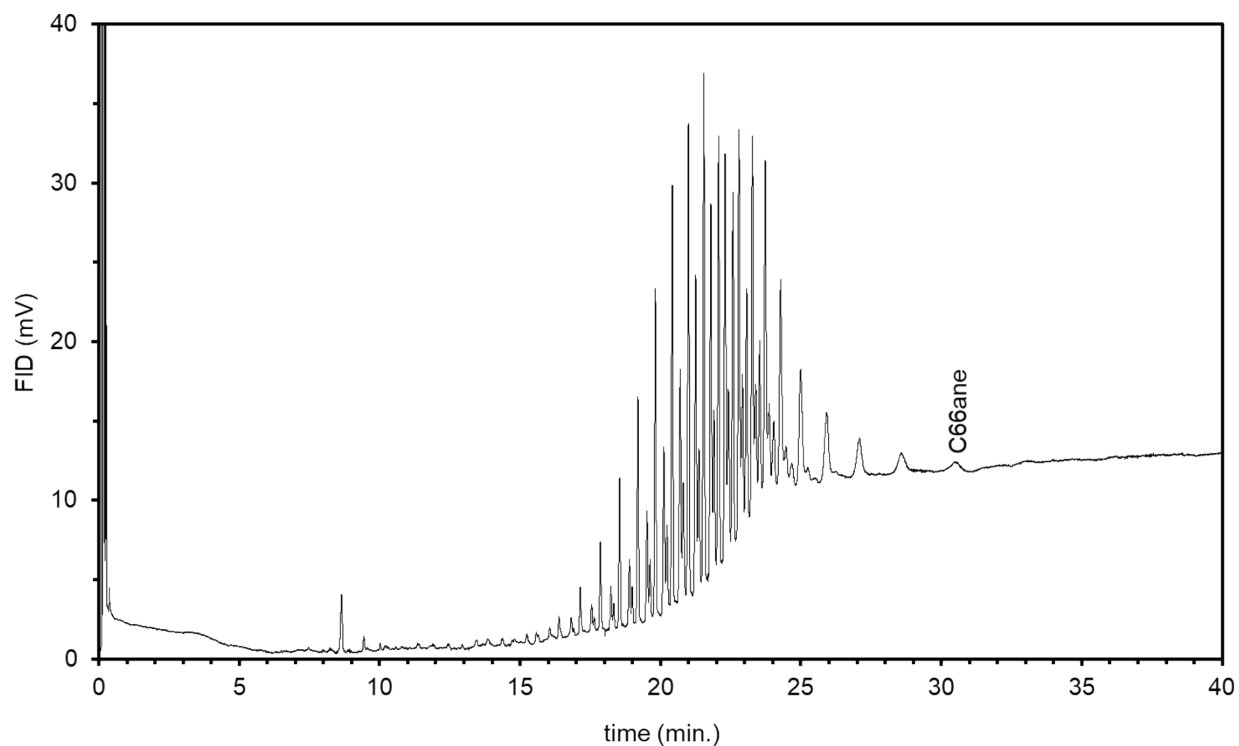

Figure S4-5a Raw signal Gas Chromatography analysis Entry 5 Table 3.

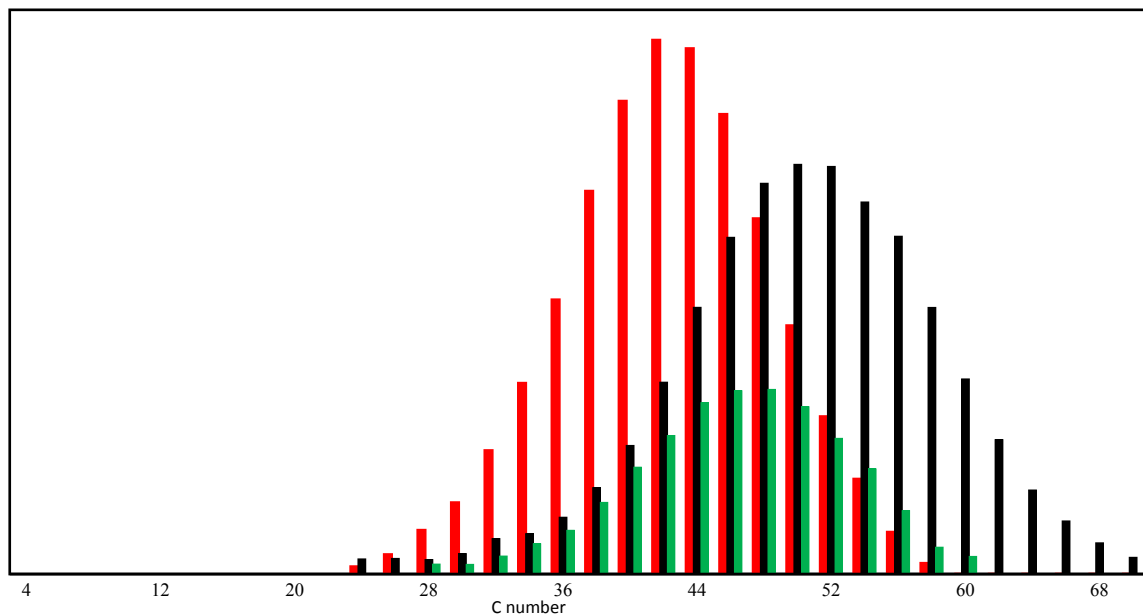

Figure S4-5b Distributions of alcohols ROH (red), hydrocarbons RH (black) and aldehydes RCHO (green). Molar amounts calculated from the GC analysis of Entry 5 Table 3.

S5 continuing, Entry 5 Table 3.

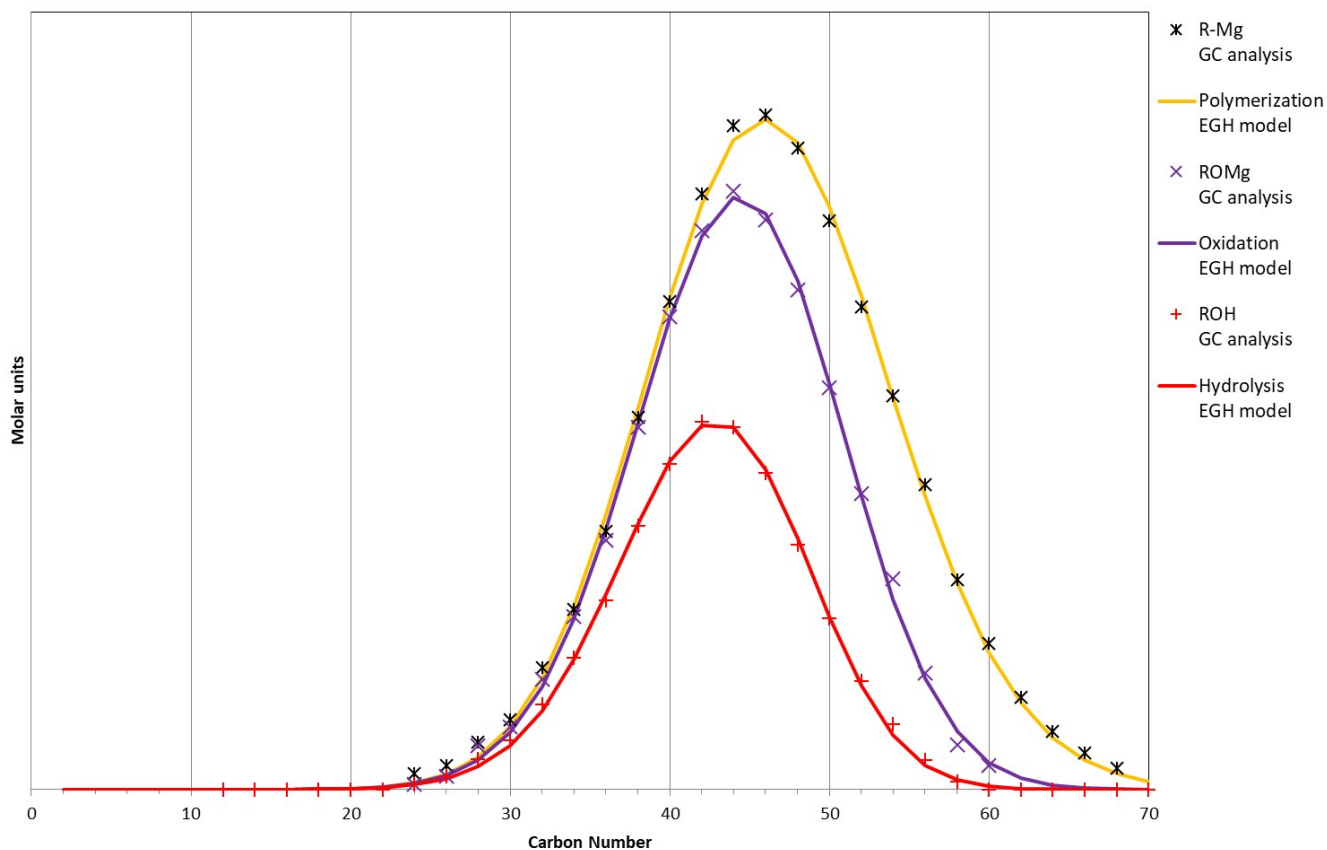

Figure S4-5c Distributions (graphics) resulting from polymerisation, oxidation and hydrolysis steps, and fitting using the Exponential-Gaussian-Hybrid model, based on the GC analysis of Entry 5 Table 3.

Table S4-5 Distributions (numerics) resulting from polymerisation, oxidation and hydrolysis steps, and fitting using the Exponential-Gaussian-Hybrid model, based on the GC analysis of Entry 5 Table 3.

| Step                                                        | Polymerisation                 | Oxidation                     | Hydrolysis          |
|-------------------------------------------------------------|--------------------------------|-------------------------------|---------------------|
| Distribution<br>sum of GC peaks                             | <b>R-Mg</b><br>ROH + RCHO + RH | <b>R-O-Mg</b><br>ROH + 2 RCHO | <b>R-O-H</b><br>ROH |
| Step efficiency<br>relative area of EGH fitting             |                                | <b>75.0%</b>                  | <b>57.1%</b>        |
| R <sup>2</sup> of EGH fitting                               | 0.9984                         | 0.9982                        | 0.9986              |
| Mn (Carbon number) of EGH fitting                           | <b>46.37</b>                   | 44.17                         | 42.46               |
| Dispersity of EGH fitting                                   | <b>1.03</b>                    | 1.02                          | 1.02                |
| Dispersity awaited for a<br>Poisson distribution of same Mn | 1.040                          | 1.042                         | 1.044               |
| Skewness of EGH fitting                                     | 0.116                          | -0.083                        | -0.148              |
| Skewness awaited for a<br>Poisson distribution of same Mn   | 0.215                          | 0.220                         | 0.225               |

S4 continuing, Entry 6 Table 4.

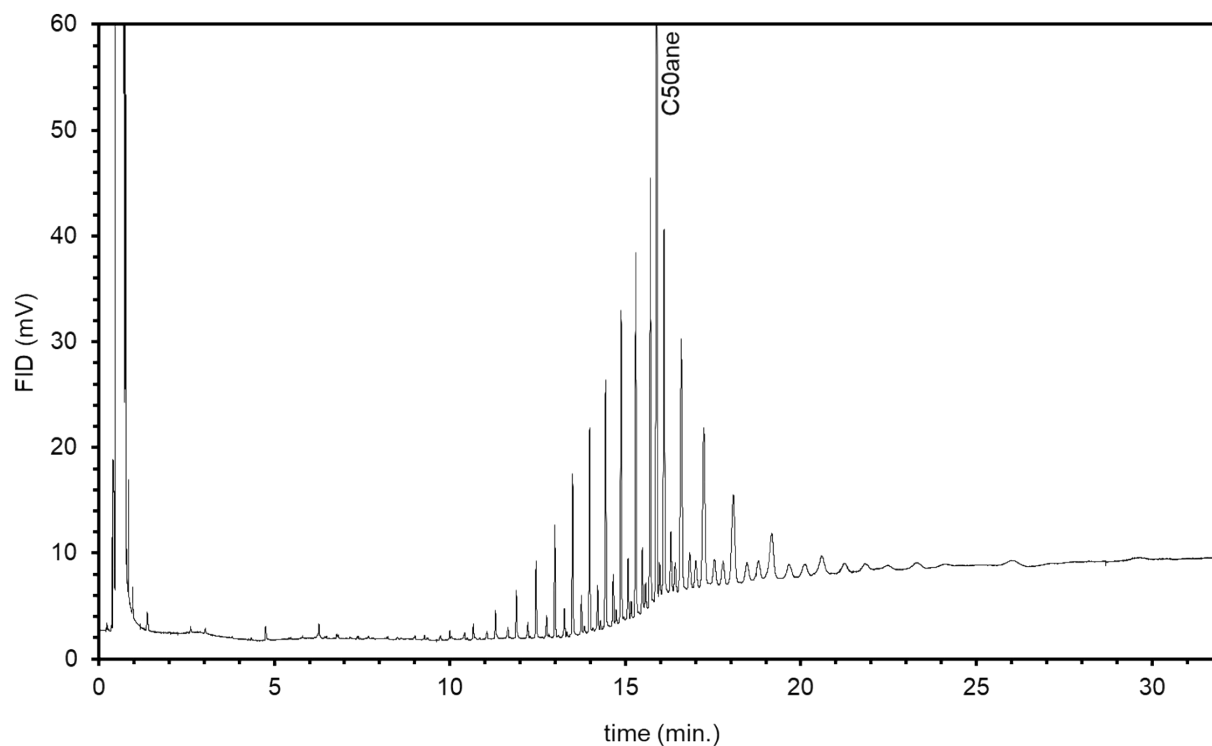

Figure S4-6a Raw signal Gas Chromatography analysis Entry 6 Table 4.

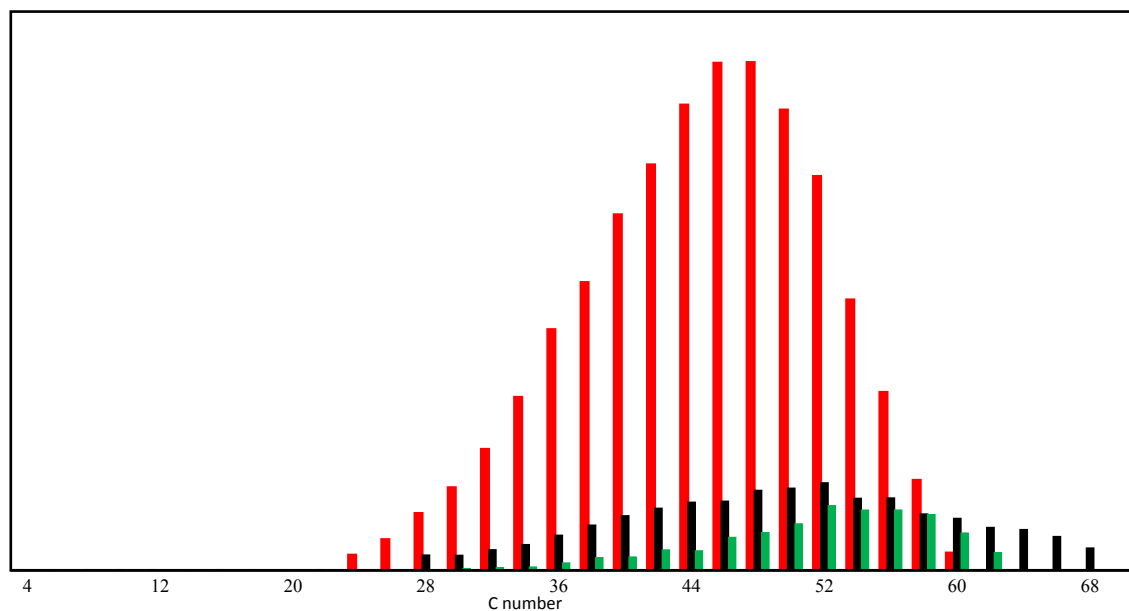

Figure S4-6b Distributions of alcohols ROH (red), hydrocarbons RH (black) and aldehydes RCHO (green). Molar amounts calculated from the GC analysis of Entry 6 Table 4.



S4 continuing, Entry 6 Table 4.

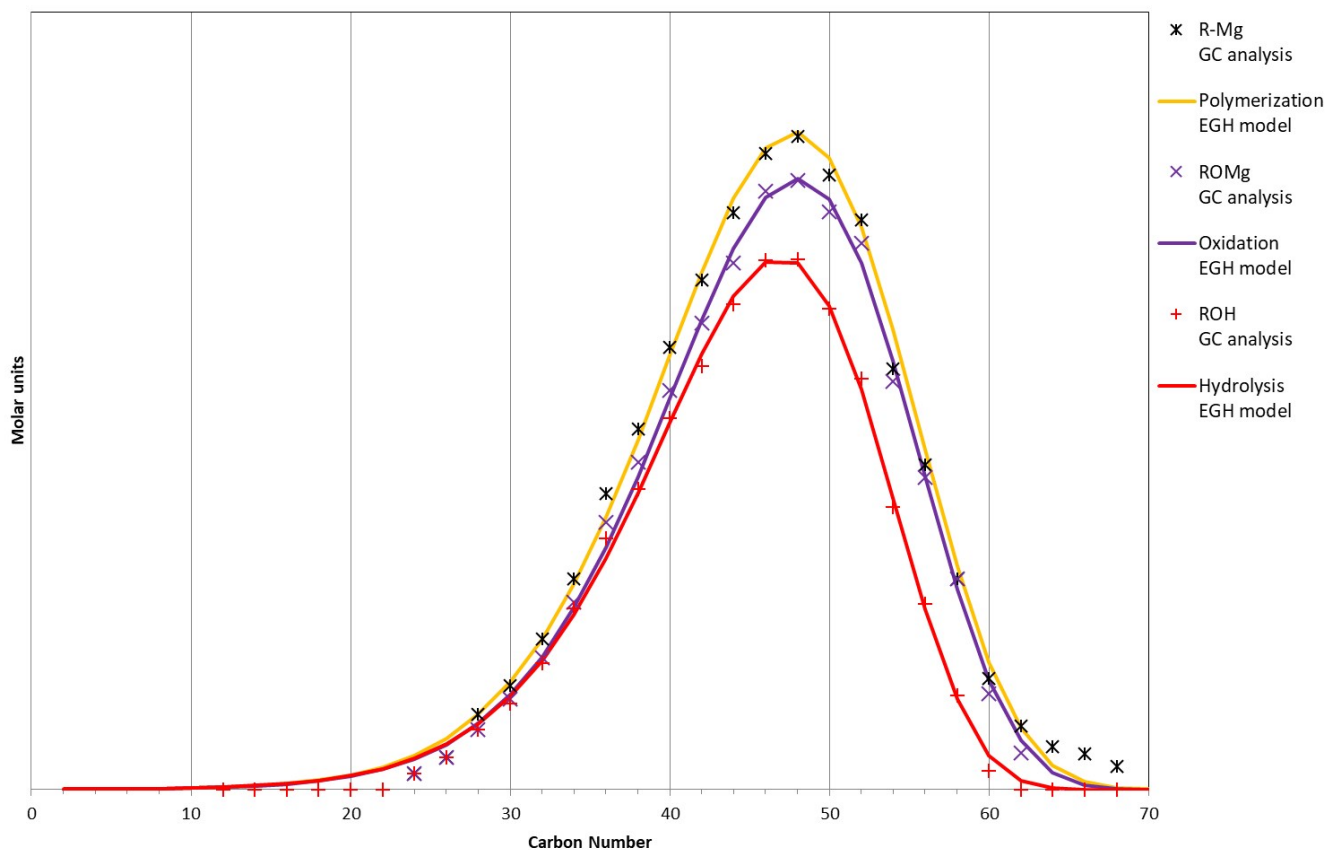

Figure S4-6c Distributions (graphics) resulting from polymerisation, oxidation and hydrolysis steps, and fitting using the Exponential-Gaussian-Hybrid model, based on the GC analysis of Entry 6 Table 4.

Table S4-6 Distributions (numerics) resulting from polymerisation, oxidation and hydrolysis steps, and fitting using the Exponential-Gaussian-Hybrid model, based on the GC analysis of Entry 6 Table 4.

| Step                                                        | Polymerisation  | Oxidation     | Hydrolysis   |
|-------------------------------------------------------------|-----------------|---------------|--------------|
| Distribution                                                | <b>R-Mg</b>     | <b>R-O-Mg</b> | <b>R-O-H</b> |
| sum of GC peaks                                             | ROH + RCHO + RH | ROH + 2 RCHO  | ROH          |
| Step efficiency<br>relative area of EGH fitting             |                 | <b>90.6%</b>  | <b>82.7%</b> |
| R <sup>2</sup> of EGH fitting                               | 0.9952          | 0.9965        | 0.9972       |
| Mn (Carbon number) of EGH fitting                           | <b>45.69</b>    | 45.73         | 44.36        |
| Dispersity of EGH fitting                                   | <b>1.03</b>     | 1.03          | 1.03         |
| Dispersity awaited for a<br>Poisson distribution of same Mn | 1.041           | 1.041         | 1.042        |
| Skewness of EGH fitting                                     | -0.517          | -0.564        | -0.672       |
| Skewness awaited for a<br>Poisson distribution of same Mn   | 0.216           | 0.216         | 0.220        |

S4 continuing, Entry 6 Table 4.

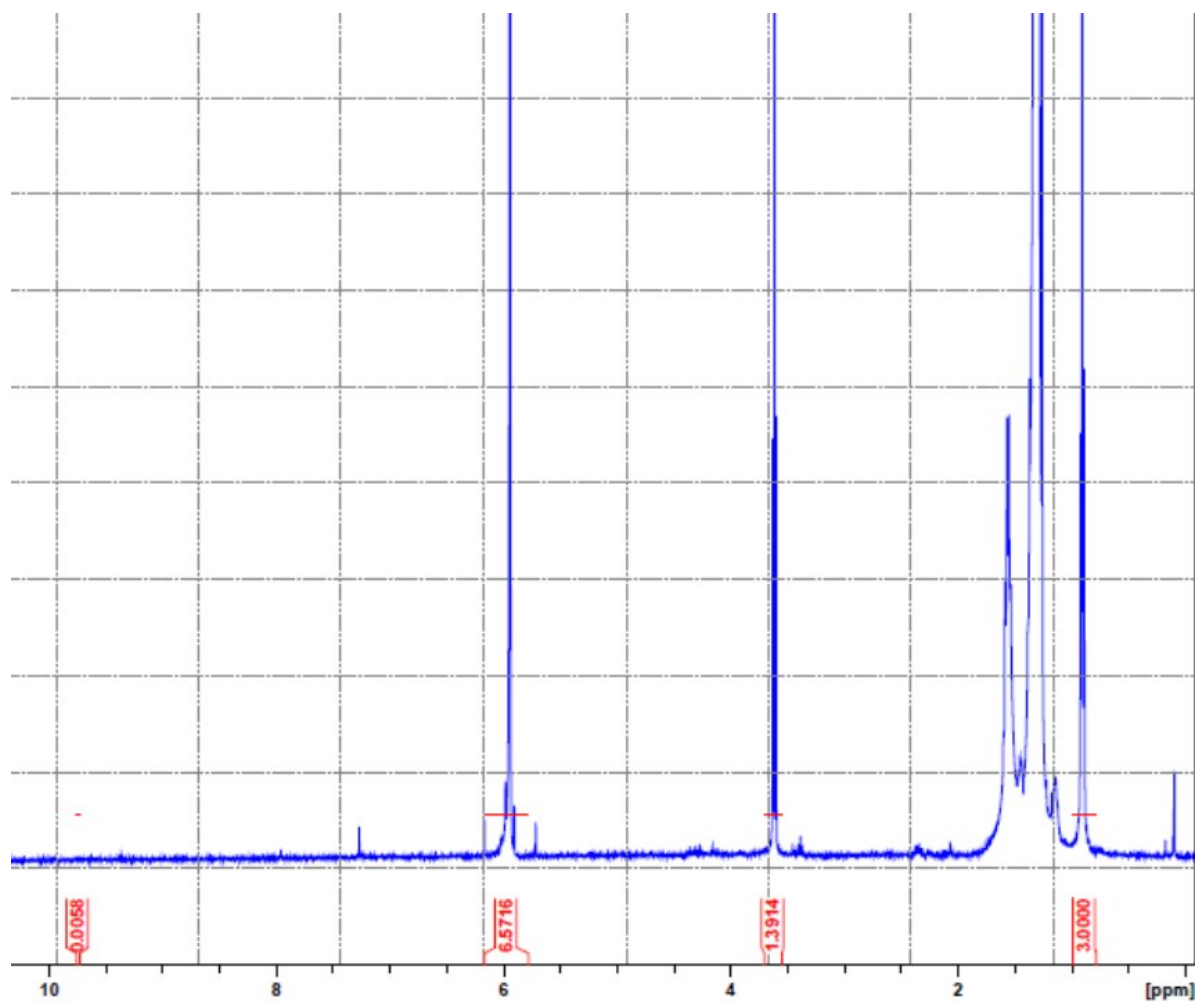

Figure S4-6d  $^1\text{H}$  NMR spectrum (solvent  $\text{C}_2\text{D}_2\text{Cl}_4$ ,  $T = 383\text{ K}$ ) of Entry 6 Table 4. ROH % = 82.1 %

S4 continuing, Entry 7 Table 4.

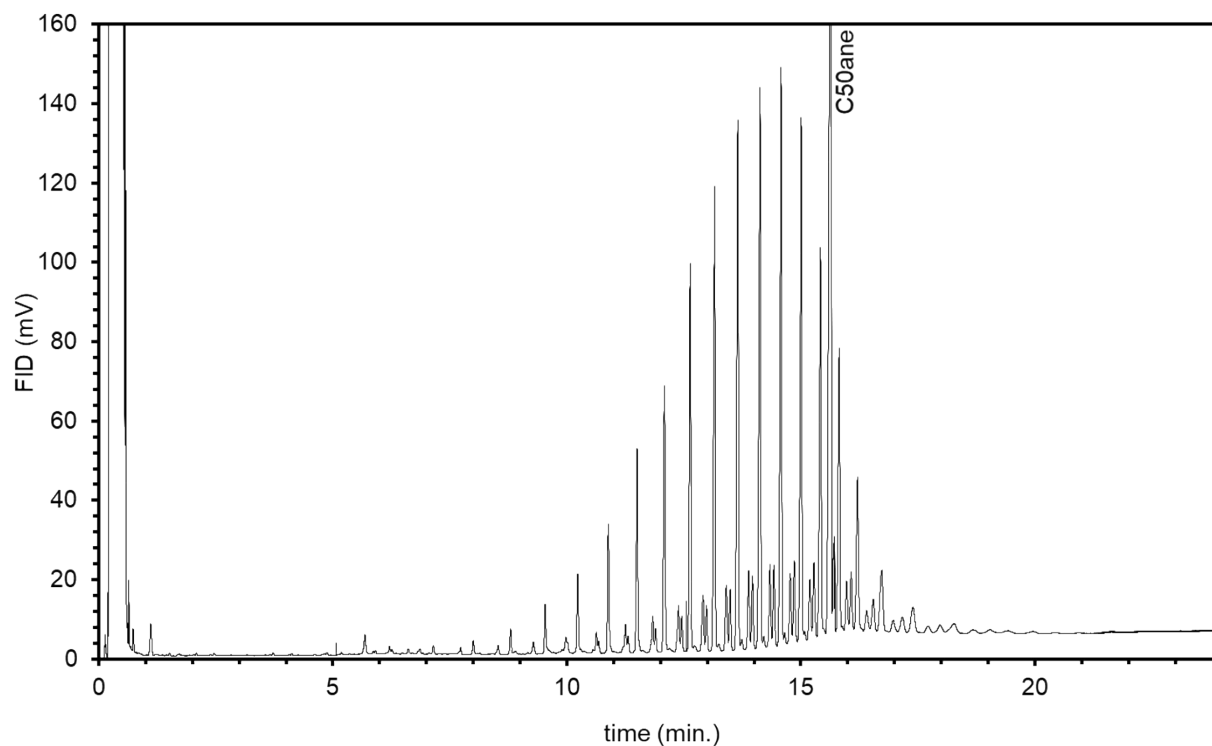

Figure S4-7a

Raw signal Gas Chromatography analysis Entry 7 Table 4.

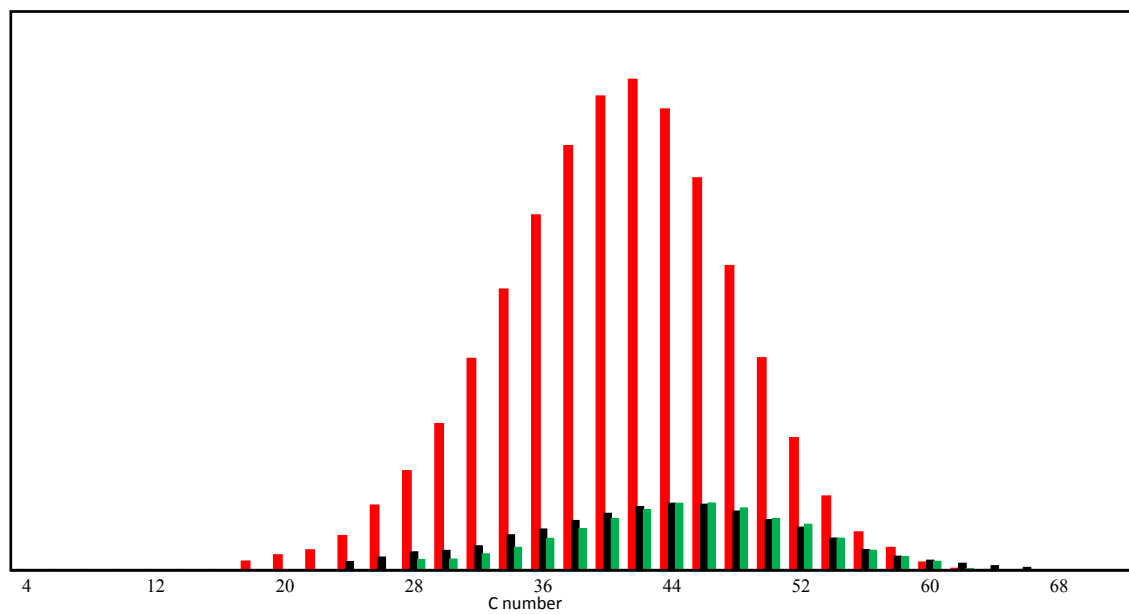

Figure S4-7b Distributions of alcohols ROH (red), hydrocarbons RH (black) and aldehydes RCHO (green). Molar amounts calculated from the GC analysis of Entry 7 Table 4.

S4 continuing, Entry 7 Table 4.

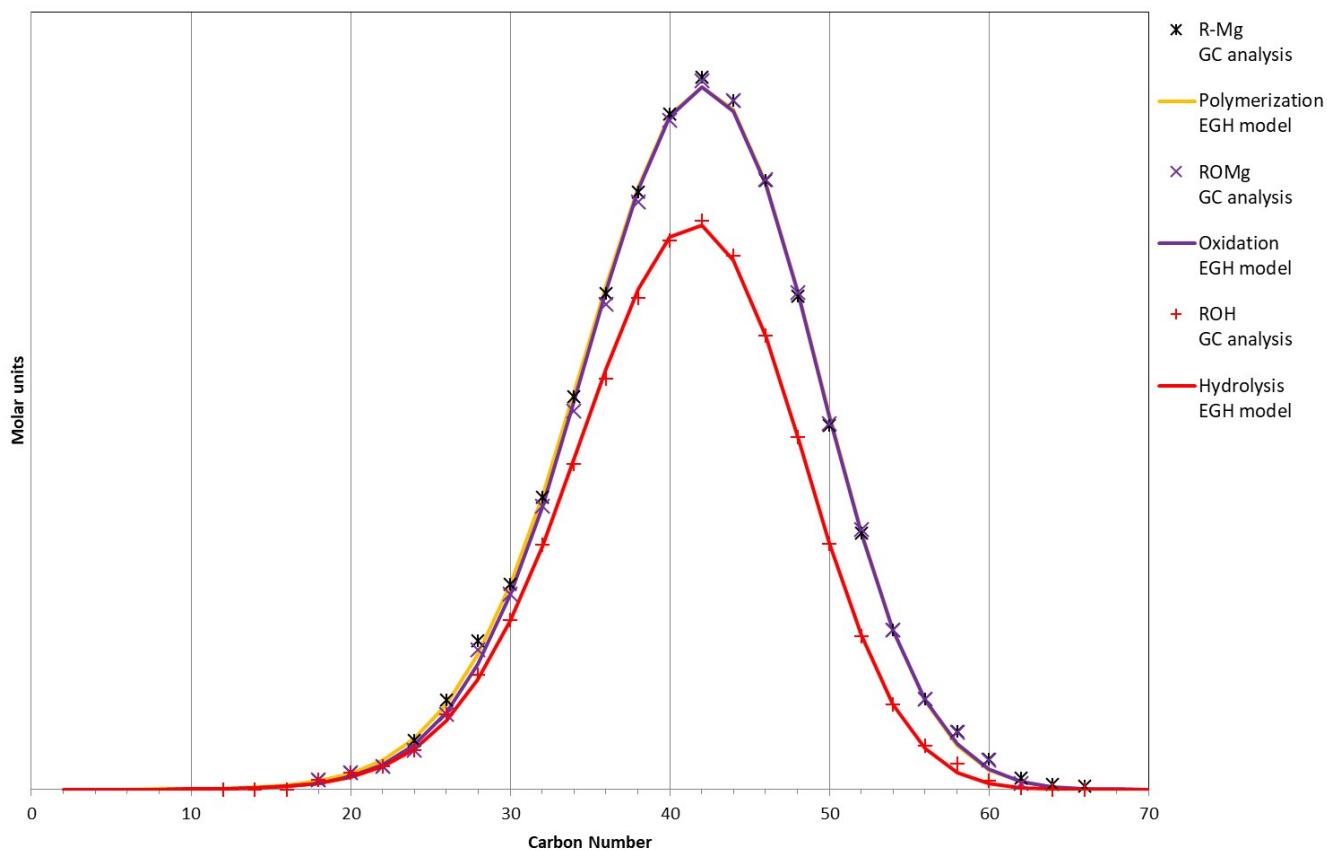

Figure S4-7c Distributions (graphics) resulting from polymerisation, oxidation and hydrolysis steps, and fitting using the Exponential-Gaussian-Hybrid model, based on the GC analysis of Entry 7 Table 4.

Table S4-7 Distributions (numerics) resulting from polymerisation, oxidation and hydrolysis steps, and fitting using the Exponential-Gaussian-Hybrid model, based on the GC analysis of Entry 7 Table 4.

| Step                                                        | Polymerisation                 | Oxidation                     | Hydrolysis          |
|-------------------------------------------------------------|--------------------------------|-------------------------------|---------------------|
| Distribution<br>sum of GC peaks                             | <b>R-Mg</b><br>ROH + RCHO + RH | <b>R-O-Mg</b><br>ROH + 2 RCHO | <b>R-O-H</b><br>ROH |
| Step efficiency<br>relative area of EGH fitting             |                                | <b>98.8%</b>                  | <b>77.5%</b>        |
| R <sup>2</sup> of EGH fitting                               | 0.9993                         | 0.9992                        | 0.9995              |
| Mn (Carbon number) of EGH fitting                           | <b>41.37</b>                   | 41.52                         | 40.66               |
| Dispersity of EGH fitting                                   | <b>1.03</b>                    | 1.03                          | 1.03                |
| Dispersity awaited for a<br>Poisson distribution of same Mn | 1.045                          | 1.045                         | 1.046               |
| Skewness of EGH fitting                                     | -0.205                         | -0.166                        | -0.243              |
| Skewness awaited for a<br>Poisson distribution of same Mn   | 0.228                          | 0.228                         | 0.230               |

S4 continuing, Entry 7 Table 4.

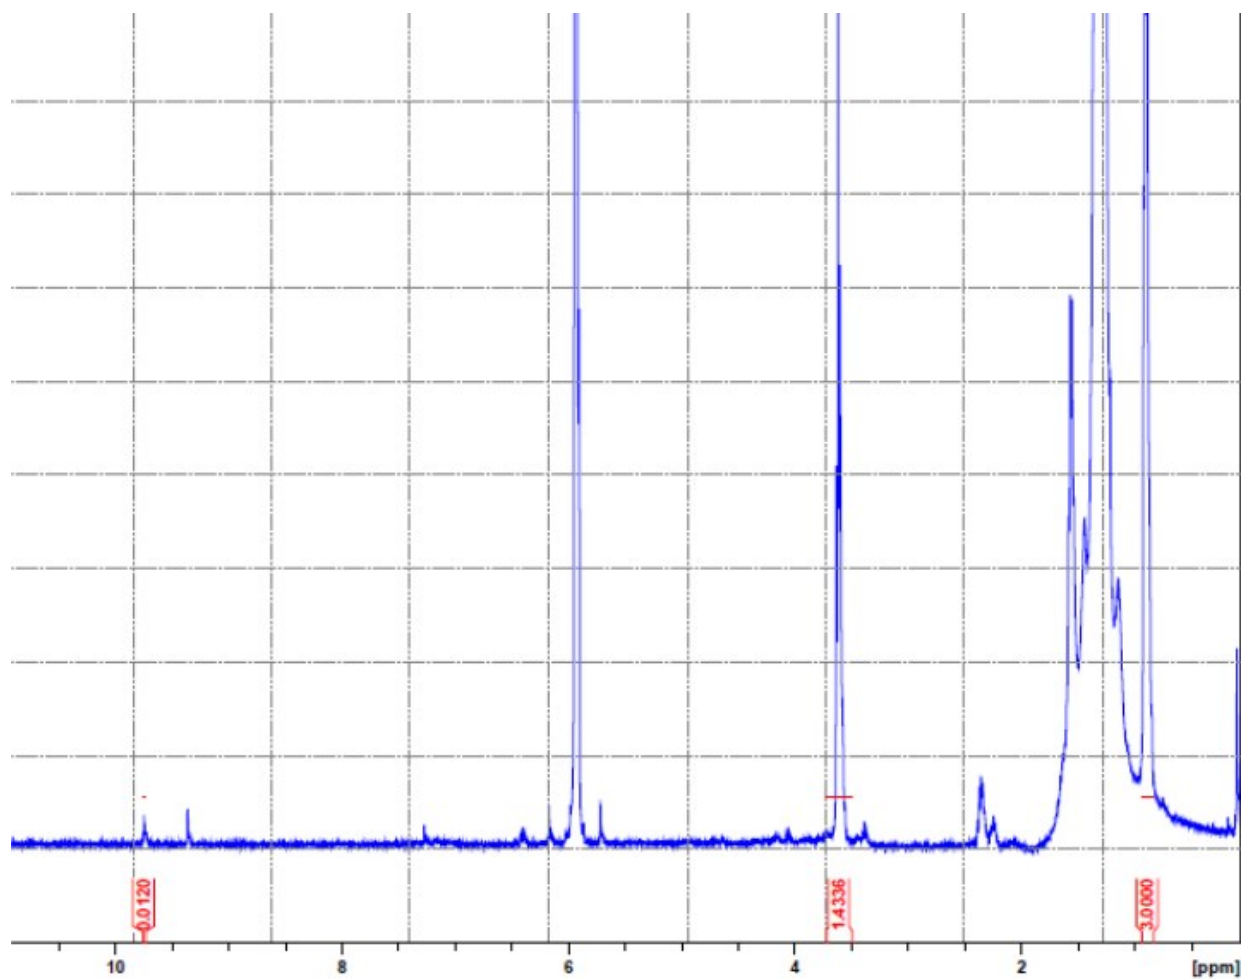

Figure S4-7d  $^1\text{H}$  NMR spectrum (solvent  $\text{C}_2\text{D}_2\text{Cl}_4$ ,  $T = 383\text{ K}$ ) of Entry 7 Table 4. ROH % = 83.5 %

S4 continuing, Entry 8 Table 4.

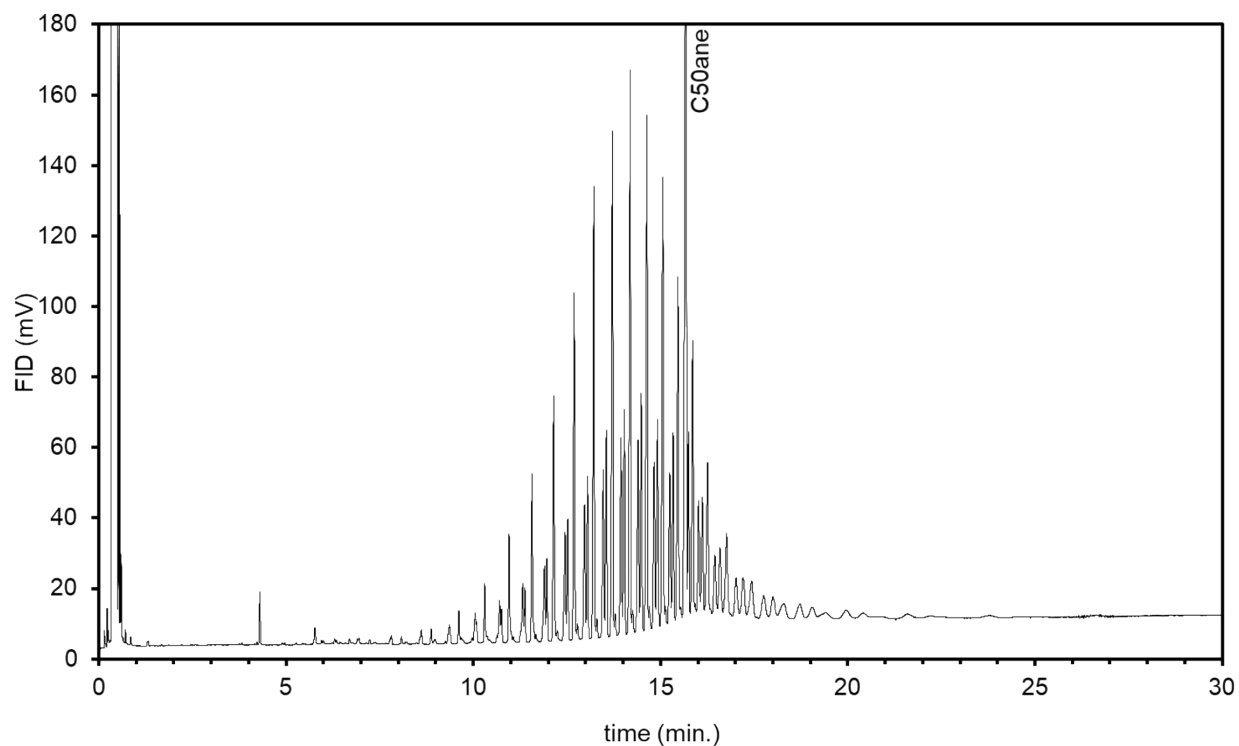

Figure S4-8a Raw signal Gas Chromatography analysis Entry 8 Table 4.

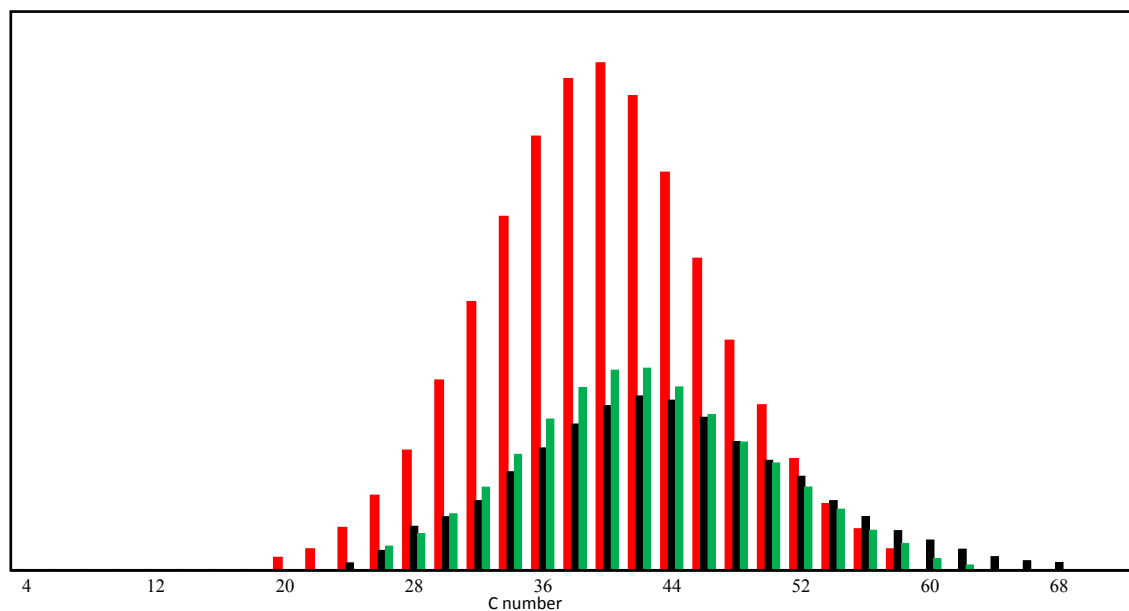

Figure S4-8b Distributions of alcohols ROH (red), hydrocarbons RH (black) and aldehydes RCHO (green). Molar amounts calculated from the GC analysis of Entry 8 Table 4.

S4 continuing, Entry 8 Table 4.

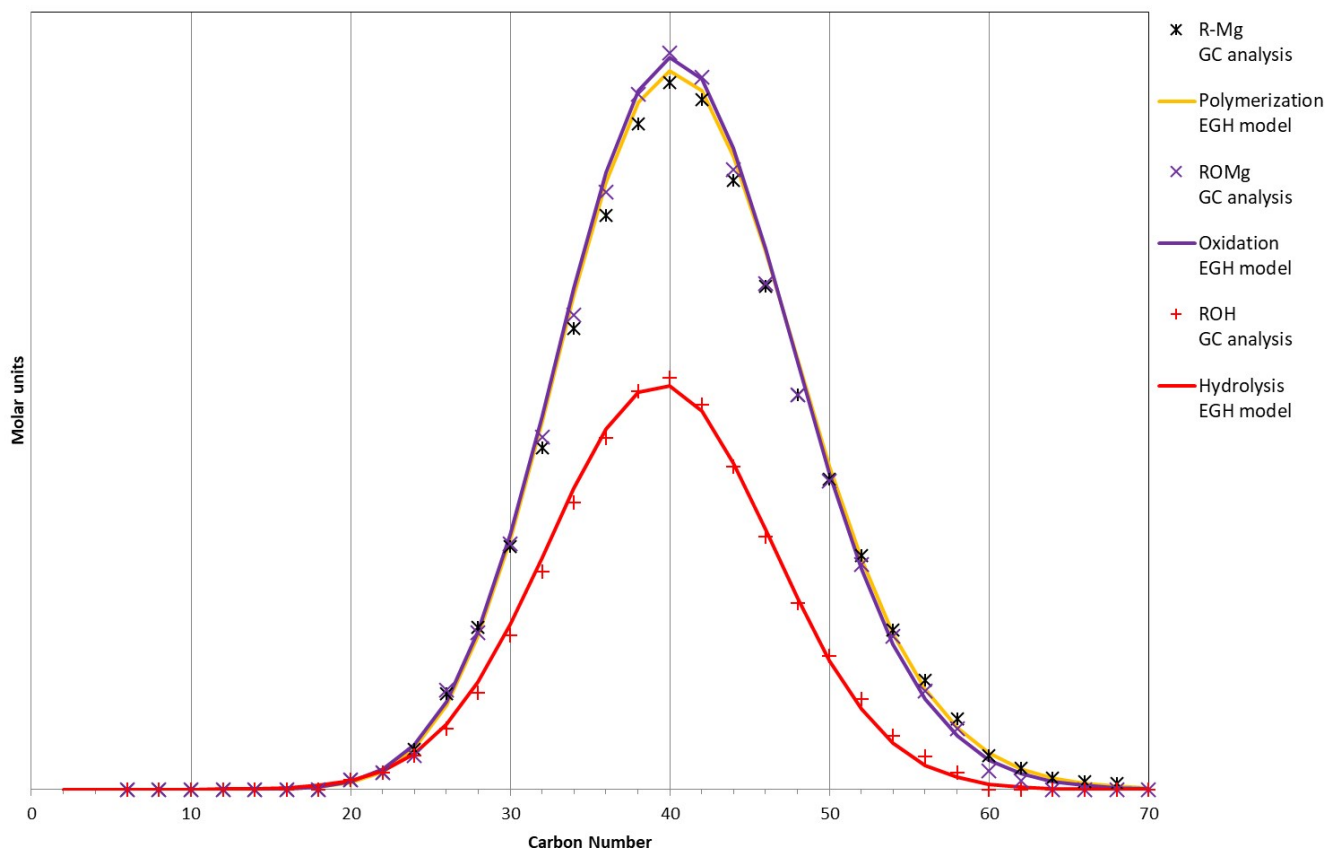

Figure S4-8c Distributions (graphics) resulting from polymerisation, oxidation and hydrolysis steps, and fitting using the Exponential-Gaussian-Hybrid model, based on the GC analysis of Entry 8 Table 4.

Table S4-8 Distributions (numerics) resulting from polymerisation, oxidation and hydrolysis steps, and fitting using the Exponential-Gaussian-Hybrid model, based on the GC analysis of Entry 8 Table 4.

| Step                                                        | Polymerisation                 | Oxidation                     | Hydrolysis          |
|-------------------------------------------------------------|--------------------------------|-------------------------------|---------------------|
| Distribution<br>sum of GC peaks                             | <b>R-Mg</b><br>ROH + RCHO + RH | <b>R-O-Mg</b><br>ROH + 2 RCHO | <b>R-O-H</b><br>ROH |
| Step efficiency<br>relative area of EGH fitting             |                                | <b>100.3%</b>                 | <b>53.0%</b>        |
| R <sup>2</sup> of EGH fitting                               | 0.9950                         | 0.9964                        | 0.9969              |
| Mn (Carbon number) of EGH fitting                           | <b>41.03</b>                   | 40.80                         | 39.40               |
| Dispersity of EGH fitting                                   | <b>1.03</b>                    | 1.03                          | 1.03                |
| Dispersity awaited for a<br>Poisson distribution of same Mn | 1.045                          | 1.045                         | 1.047               |
| Skewness of EGH fitting                                     | 0.222                          | 0.164                         | 0.000               |
| Skewness awaited for a<br>Poisson distribution of same Mn   | 0.229                          | 0.230                         | 0.234               |

S4 continuing, Entry 8 Table 4.

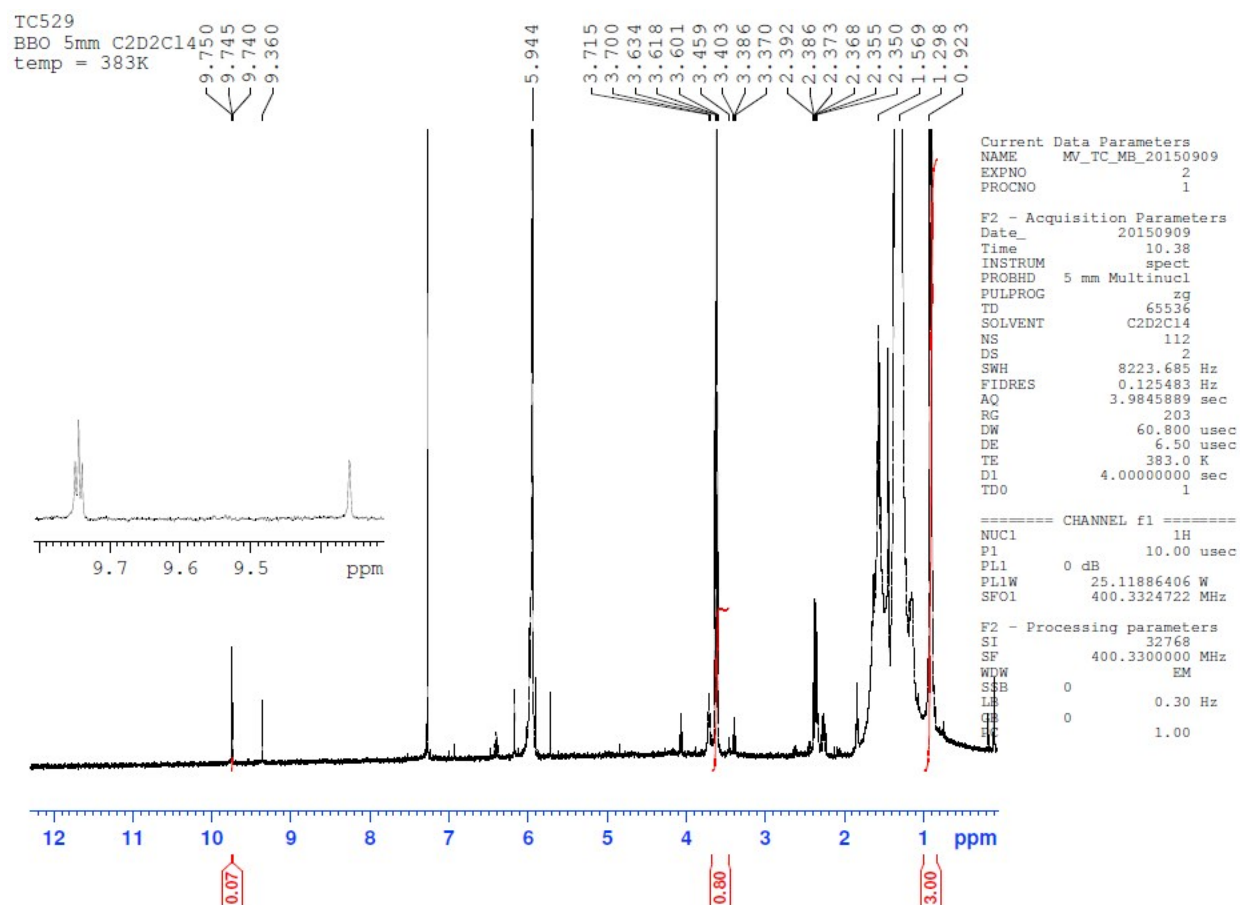

Figure S4-8d  $^1\text{H}$  NMR spectrum (solvent  $\text{C}_2\text{D}_2\text{Cl}_4$ ,  $T = 383\text{ K}$ ) of Entry 8 Table 4. ROH % = 57.1 %



S4 continuing, Entry 9 Table 4.

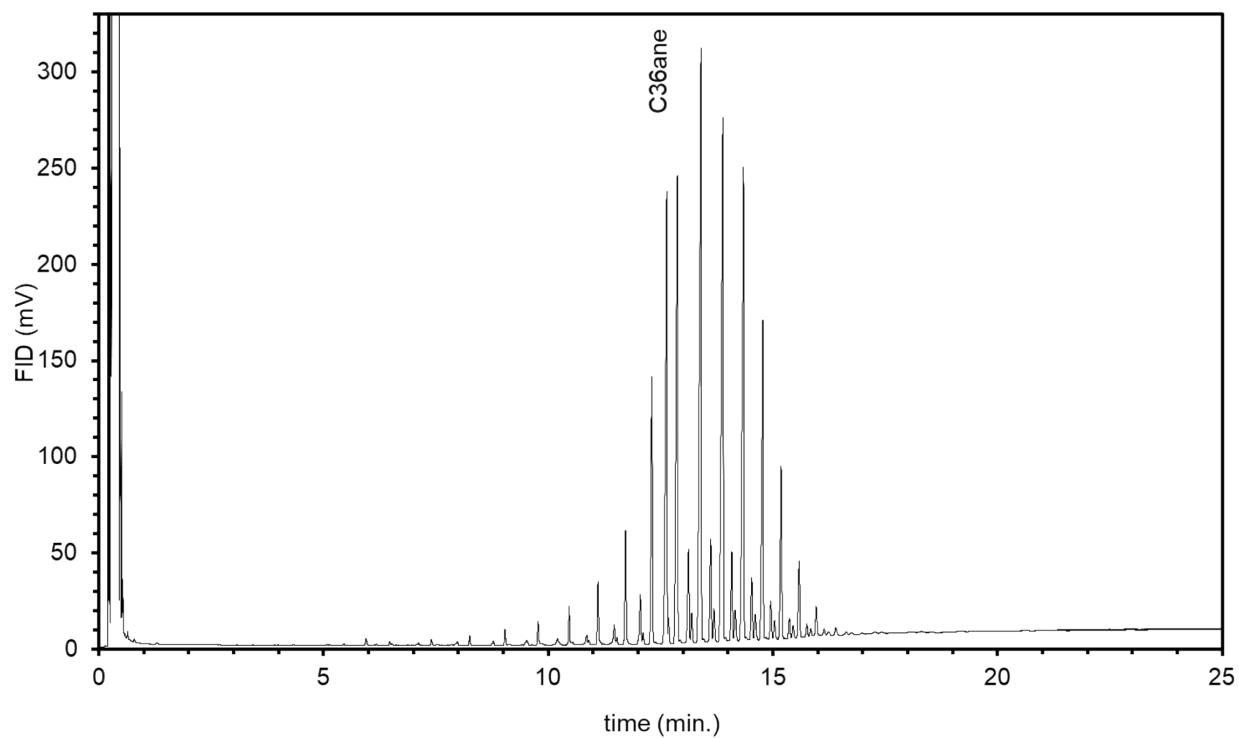

Figure S4-9a Raw signal Gas Chromatography analysis Entry 9 Table 4.

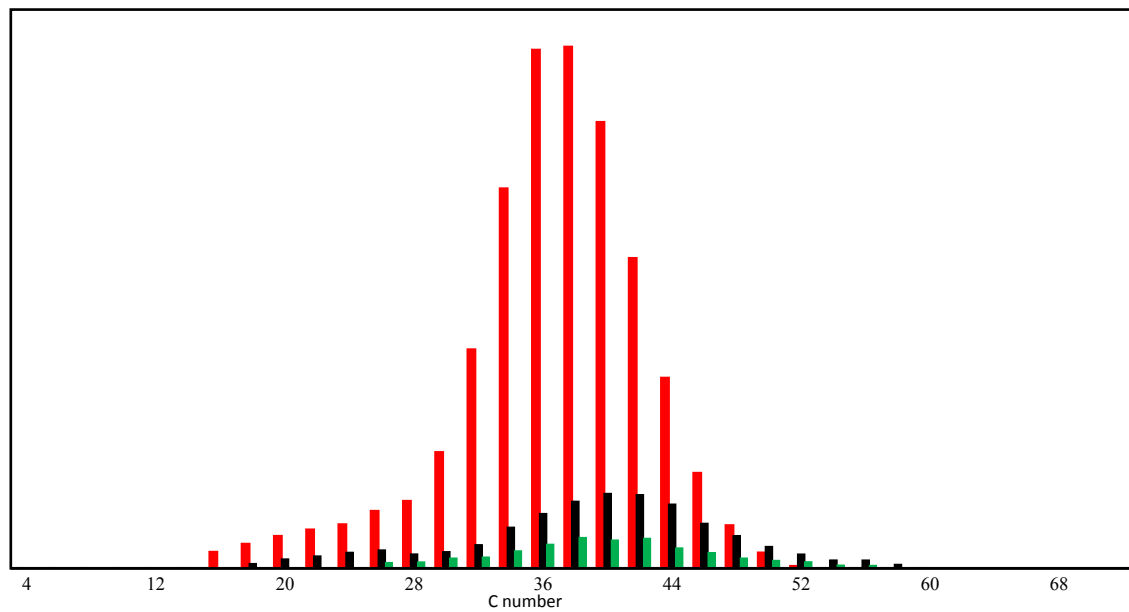

Figure S4-9b Distributions of alcohols ROH (red), hydrocarbons RH (black) and aldehydes RCHO (green). Molar amounts calculated from the GC analysis of Entry 9 Table 3.

S4 continuing, Entry 9 Table 4.

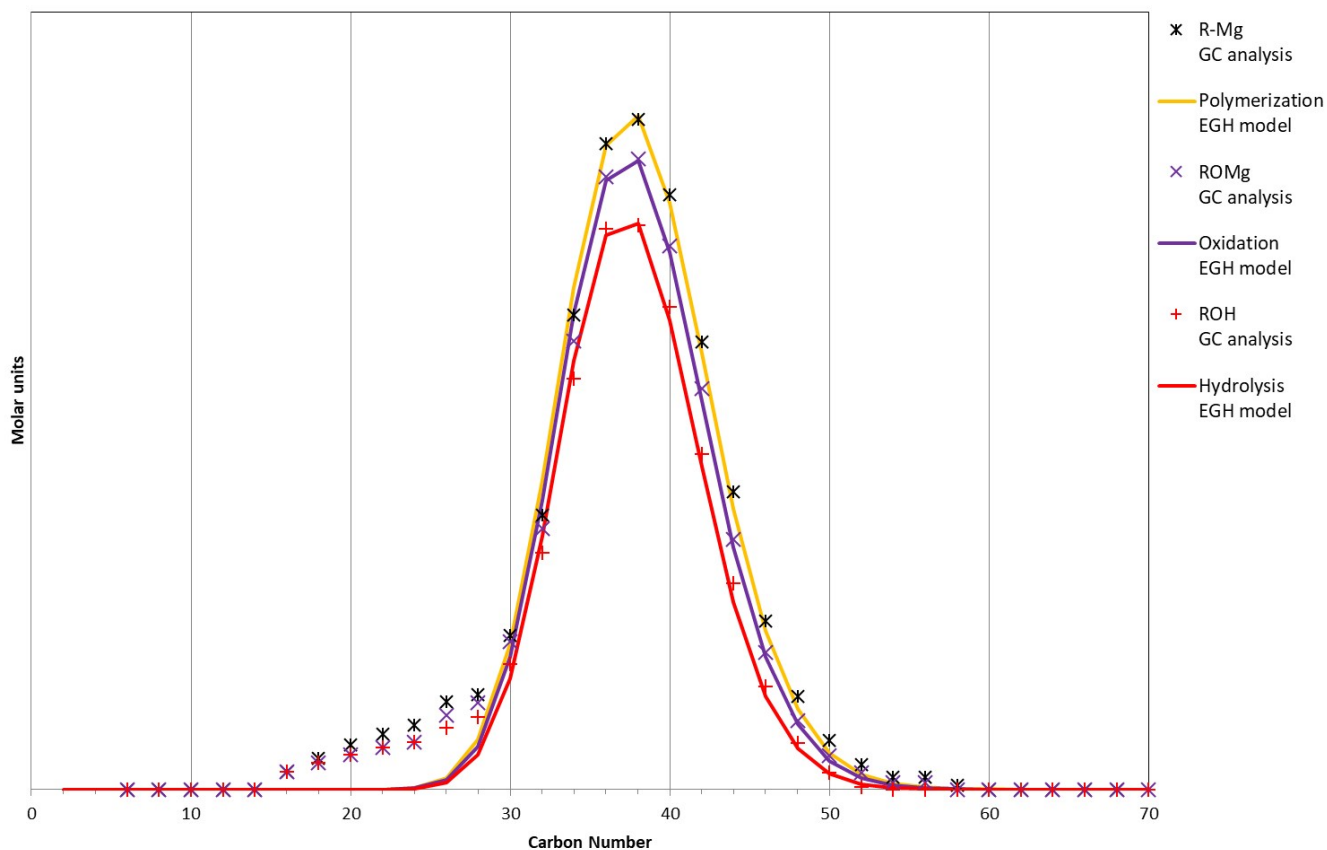

Figure S4-9c Distributions (graphics) resulting from polymerisation, oxidation and hydrolysis steps, and fitting using the Exponential-Gaussian-Hybrid model, based on the GC analysis of Entry 9 Table 4.

Table S4-9 Distributions (numerics) resulting from polymerisation, oxidation and hydrolysis steps, and fitting using the Exponential-Gaussian-Hybrid model, based on the GC analysis of Entry 9 Table 4.

| Step                                                        | Polymerisation  | Oxidation     | Hydrolysis   |
|-------------------------------------------------------------|-----------------|---------------|--------------|
| Distribution                                                | <b>R-Mg</b>     | <b>R-O-Mg</b> | <b>R-O-H</b> |
| sum of GC peaks                                             | ROH + RCHO + RH | ROH + 2 RCHO  | ROH          |
| Step efficiency<br>relative area of EGH fitting             |                 | <b>91.4%</b>  | <b>85.9%</b> |
| R <sup>2</sup> of EGH fitting                               | 0.9800          | 0.9842        | 0.9822       |
| Mn (Carbon number) of EGH fitting                           | <b>38.13</b>    | 37.98         | 37.72        |
| Dispersity of EGH fitting                                   | <b>1.02</b>     | 1.01          | 1.01         |
| Dispersity awaited for a<br>Poisson distribution of same Mn | 1.048           | 1.049         | 1.049        |
| Skewness of EGH fitting                                     | 0.291           | 0.298         | 0.245        |
| Skewness awaited for a<br>Poisson distribution of same Mn   | 0.239           | 0.239         | 0.240        |

S4 continuing, Entry 9 Table 4.

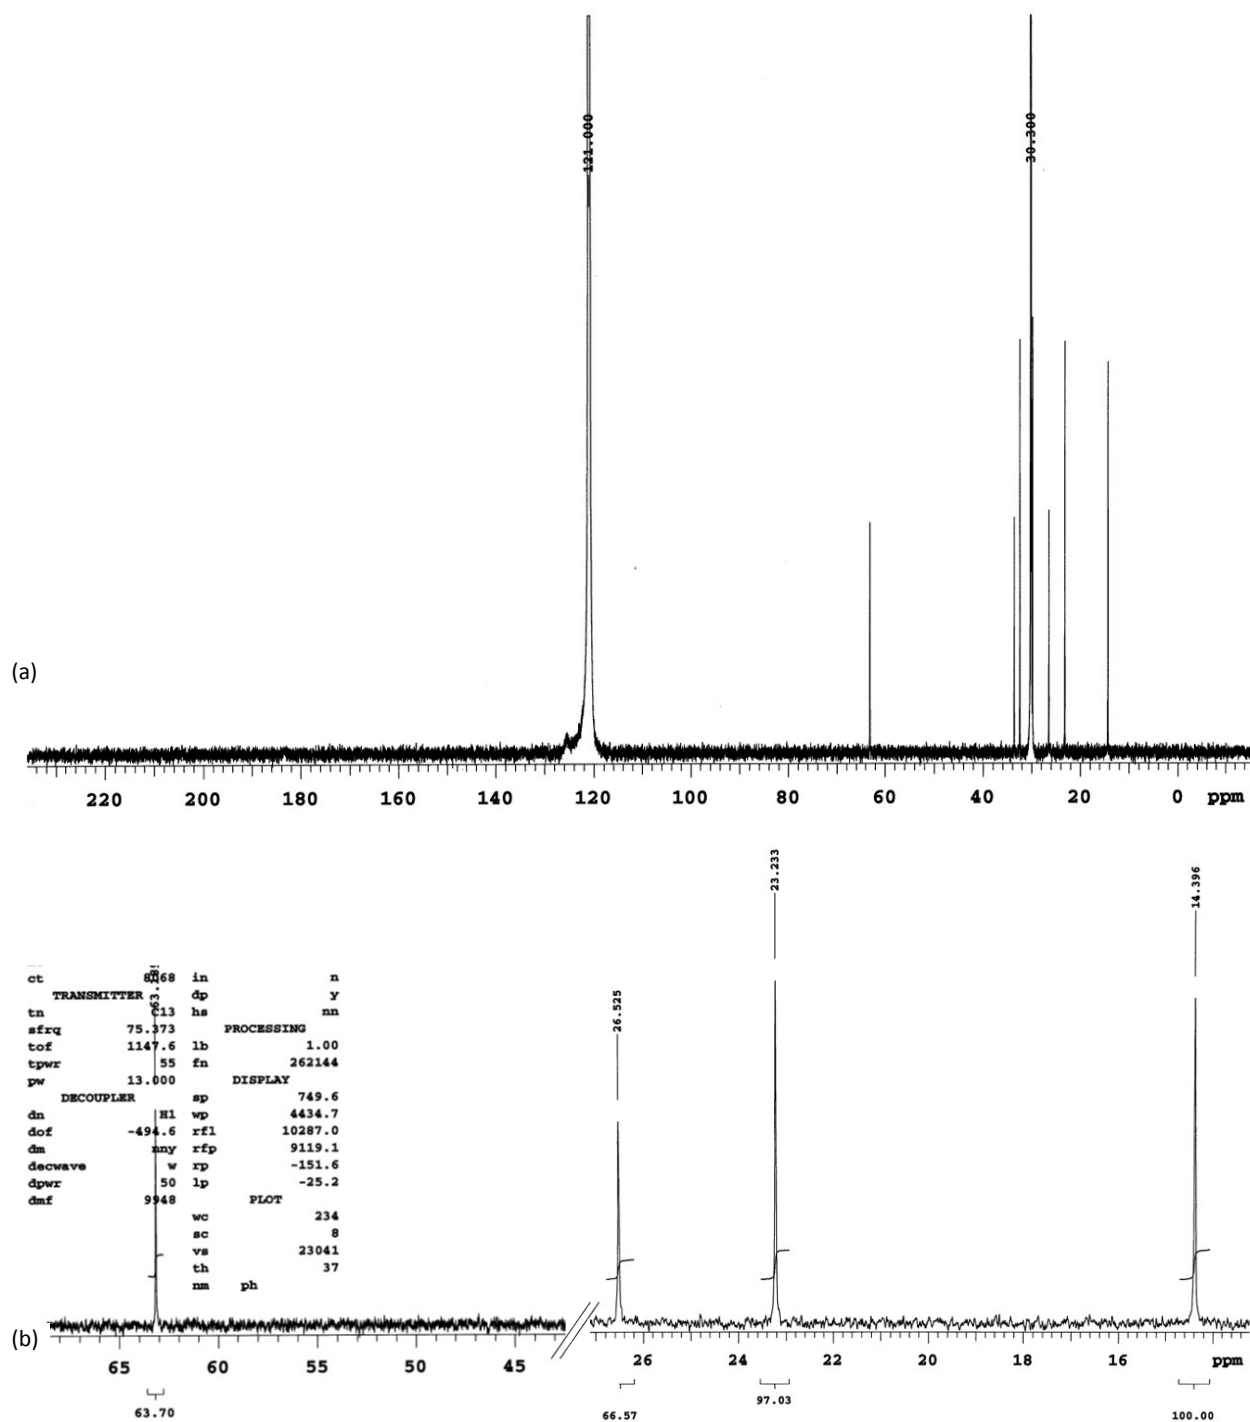

Figure S4-9d  $^{13}\text{C}$  NMR spectrum (solvent  $\text{Cl}_2\text{C}=\text{CCl}_2$ , in the presence of  $\text{Cr}(\text{acac})_3$ ,  $\text{D}_2\text{O}$  capillary lock,  $T = 368\text{ K}$ ) of Entry 9 Table 4. Full range (a) and selected zone for integration (b). ROH % = 79.3 %

S4 continuing, Entry 9 Table 4.

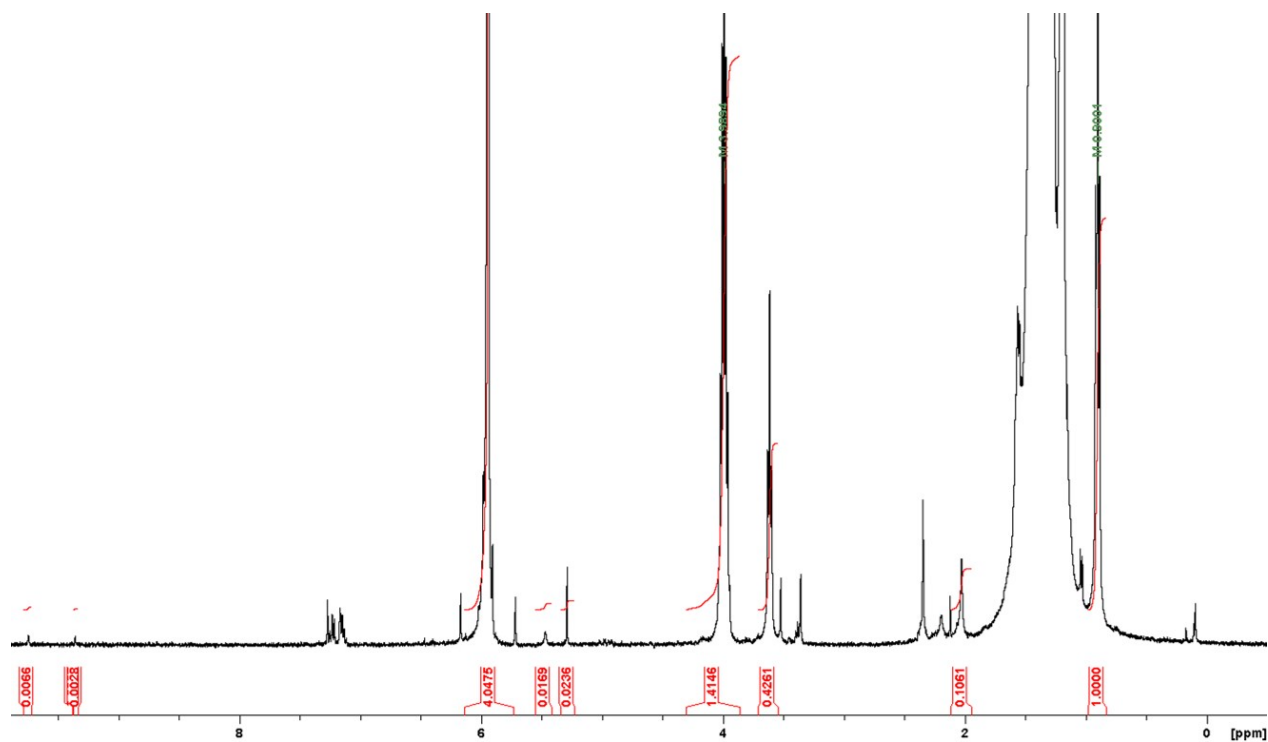

Figure S4-9e  $^1\text{H}$  NMR spectrum (solvent  $\text{C}_2\text{D}_2\text{Cl}_4$ ,  $T = 383\text{ K}$ ) of Entry 9 Table 4. ROH % = 78 %.

S4 continuing, Entry 10 Table 4.

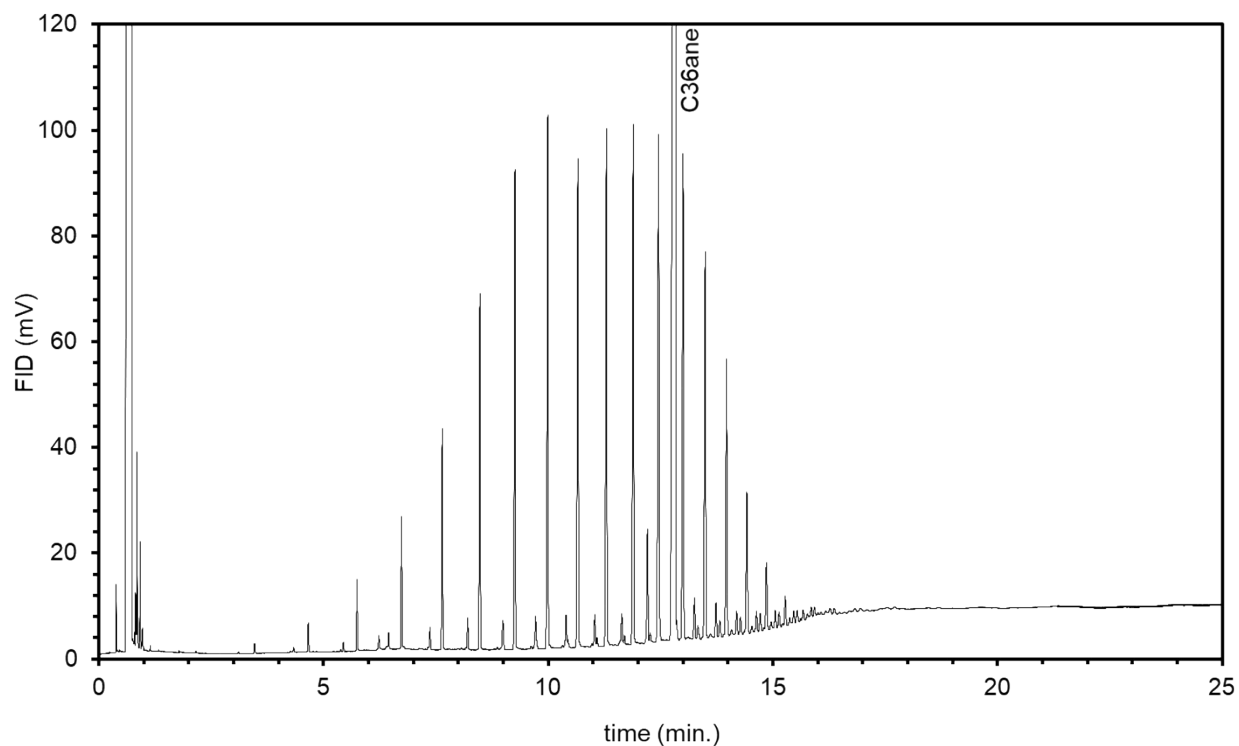

Figure S4-10a Raw signal Gas Chromatography analysis Entry 10 Table 4.

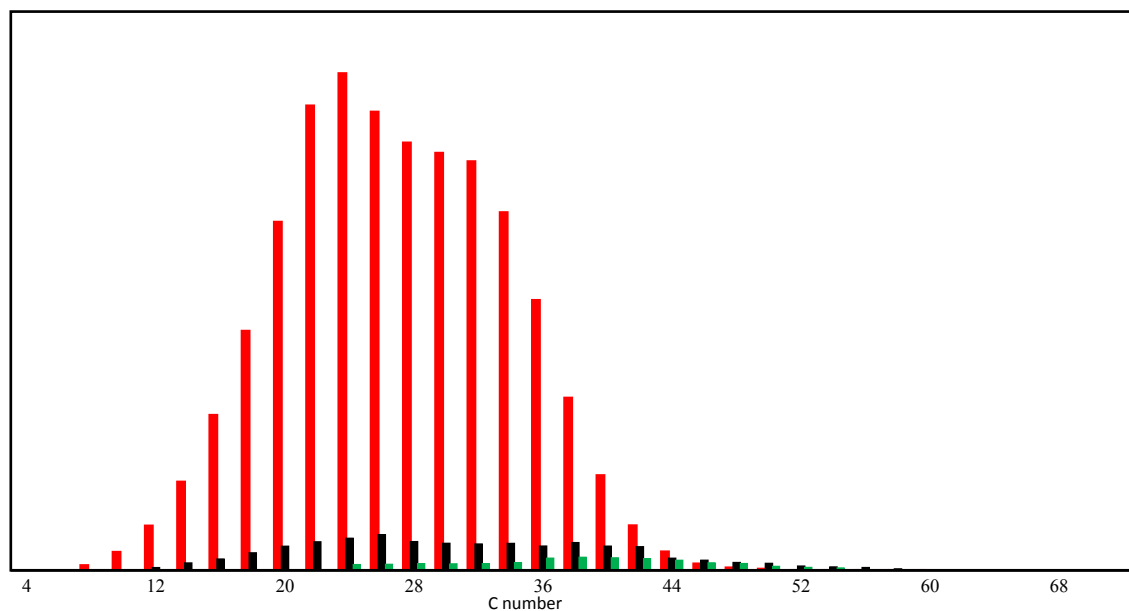

Figure S4-10b Distributions of alcohols ROH (red), hydrocarbons RH (black) and aldehydes RCHO (green). Molar amounts calculated from the GC analysis of Entry 10 Table 4.

S4 continuing, Entry 10 Table 4.

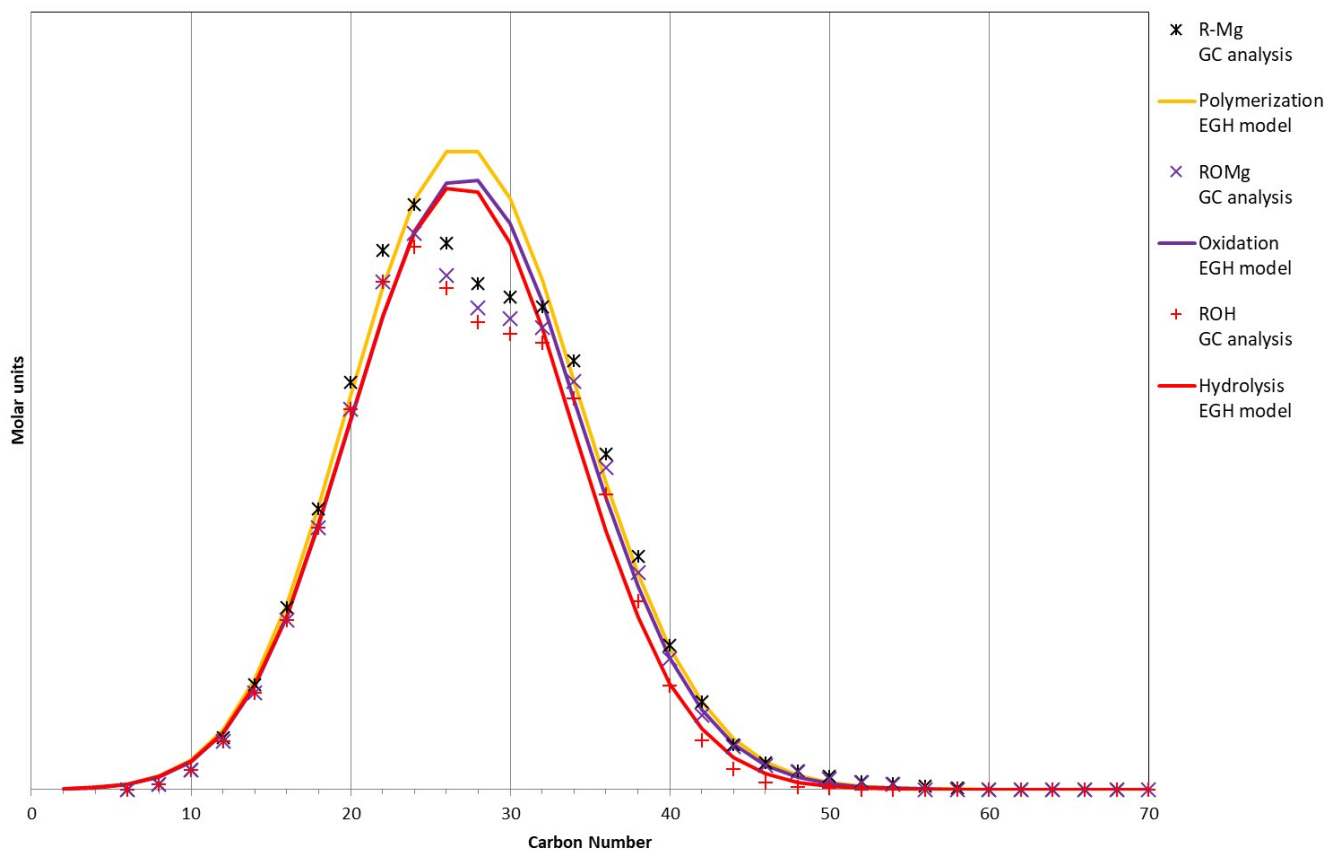

Figure S4-10c Distributions (graphics) resulting from polymerisation, oxidation and hydrolysis steps, and fitting using the Exponential-Gaussian-Hybrid model, based on the GC analysis of Entry 10 Table 4.

Table S4-10 Distributions (numerics) resulting from polymerisation, oxidation and hydrolysis steps, and fitting using the Exponential-Gaussian-Hybrid model, based on the GC analysis of Entry 10 Table 4.

| Step                                                        | Polymerisation  | Oxidation     | Hydrolysis   |
|-------------------------------------------------------------|-----------------|---------------|--------------|
| Distribution                                                | <b>R-Mg</b>     | <b>R-O-Mg</b> | <b>R-O-H</b> |
| sum of GC peaks                                             | ROH + RCHO + RH | ROH + 2 RCHO  | ROH          |
| Step efficiency<br>relative area of EGH fitting             |                 | <b>94.6%</b>  | <b>95.9%</b> |
| R <sup>2</sup> of EGH fitting                               | 0.9673          | 0.9612        | 0.9545       |
| Mn (Carbon number) of EGH fitting                           | <b>27.45</b>    | 27.44         | 27.00        |
| Dispersity of EGH fitting                                   | <b>1.07</b>     | 1.07          | 1.07         |
| Dispersity awaited for a<br>Poisson distribution of same Mn | 1.065           | 1.065         | 1.066        |
| Skewness of EGH fitting                                     | 0.127           | 0.097         | 0.046        |
| Skewness awaited for a<br>Poisson distribution of same Mn   | 0.286           | 0.286         | 0.289        |

S4 continuing, Entry 10 Table 4.

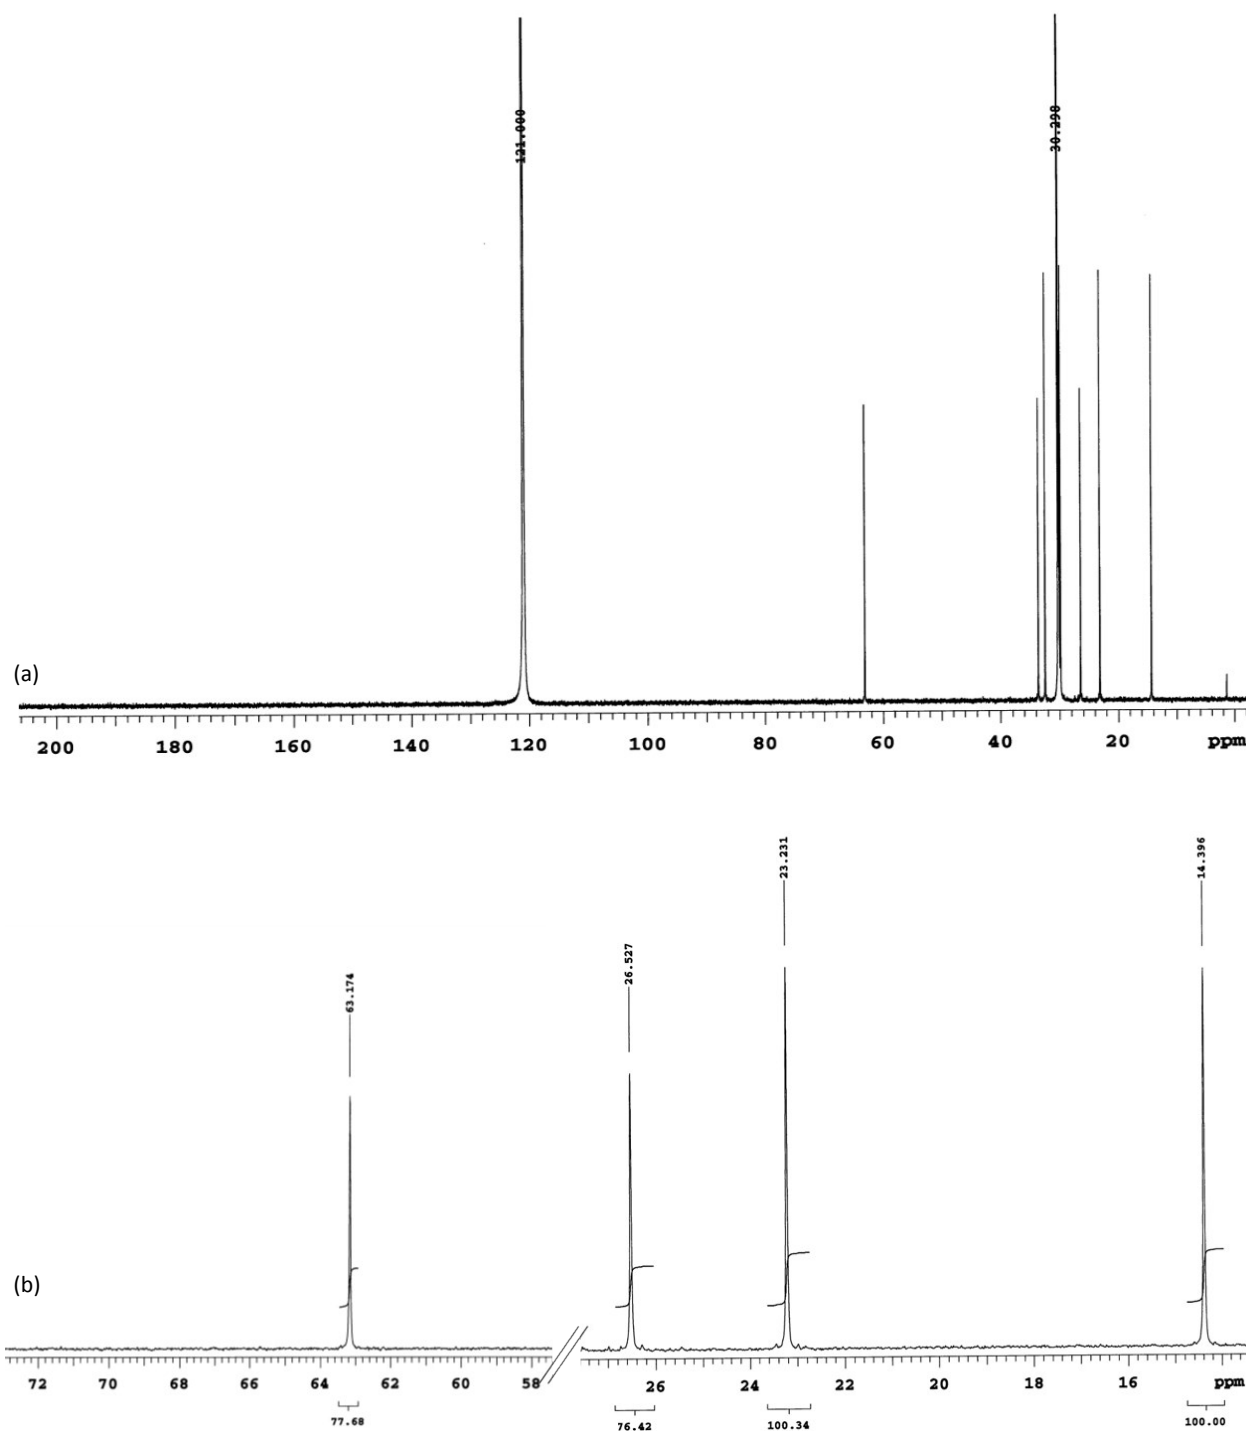

Figure S4-10d  $^{13}\text{C}$  NMR spectrum (solvent  $\text{Cl}_2\text{C}=\text{CCl}_2$ , in the presence of  $\text{Cr}(\text{acac})_3$ ,  $\text{D}_2\text{O}$  capillary lock,  $T = 373\text{ K}$ ) of Entry 10 Table 4. Full range (a) and selected zone for integration (b). ROH % = 87.3 %

S4 continuing, Entry 10 Table 4.

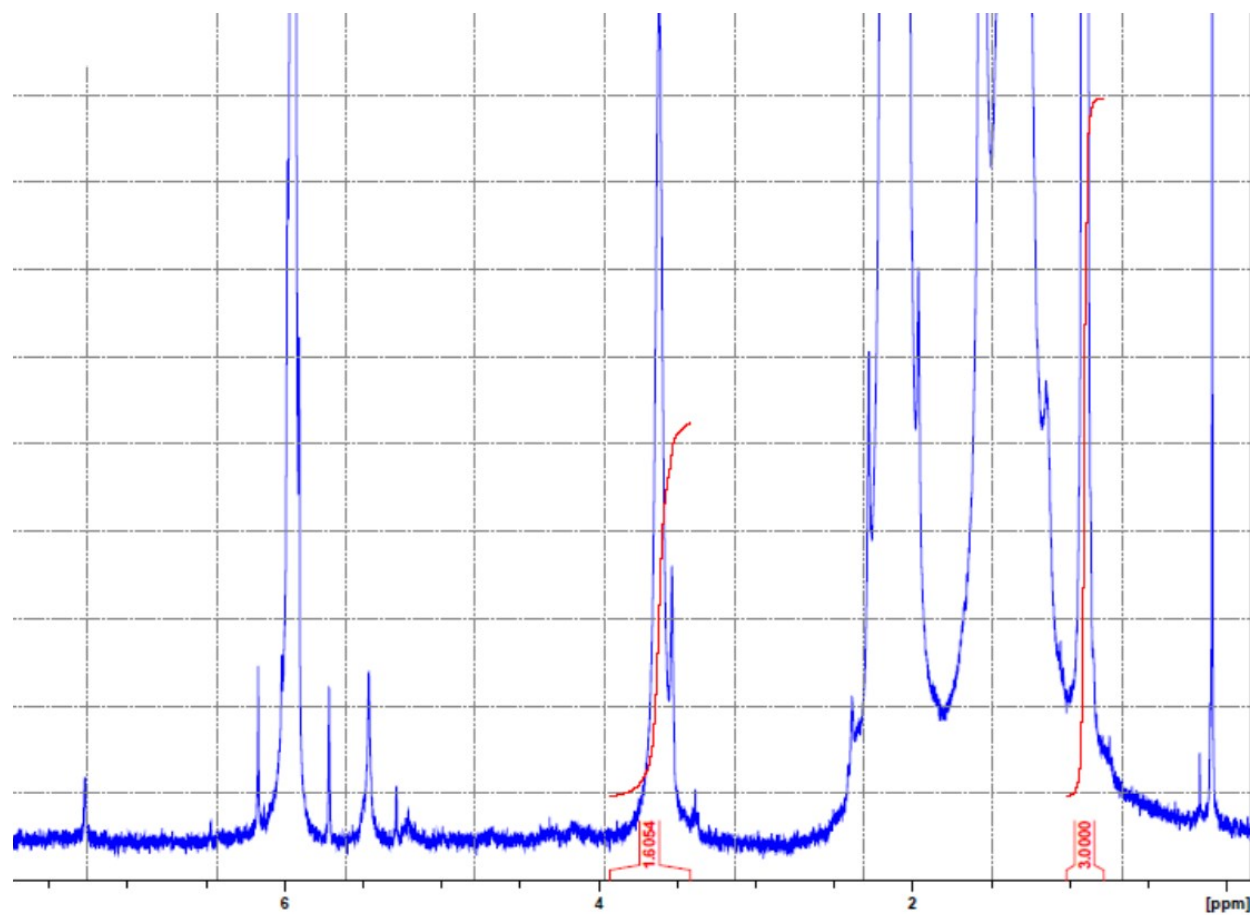

Figure S4-10e  $^1\text{H}$  NMR spectrum (solvent  $\text{C}_2\text{D}_2\text{Cl}_4$ , in the presence of  $\text{Cr}(\text{acac})_3$ ,  $T = 383\text{ K}$ ) of Entry 10 Table 4. ROH % = 89.0 %.



S5 GC/MS, IR and  $^1\text{H}$  NMR analyses for aldehyde determination in fatty alcohols.

S5-1 GC/MS analysis of a mixture of octanal and 1-octanol standards.

Analyzed : 18/06/2014 19:21:05  
Sample Name : 1-octanal+1-octanol  
Data File : F:\1-octanal+1-octanol.qgd  
Org Data File : C:\GCMSsolution\Data\EI\CD\1-octanal+1-octanol.qgd  
Method File : C:\GCMSsolution\Data\EI\CD\methode 25032014-thomas.qgm

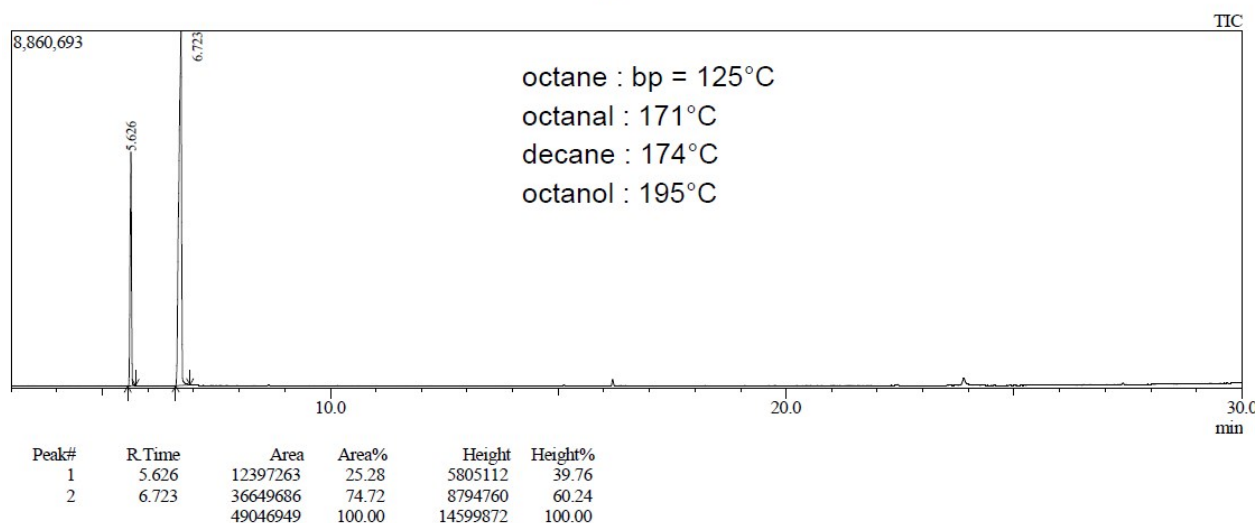

Line#1 R Time:5.625(Scan#:316)

MassPeaks:511

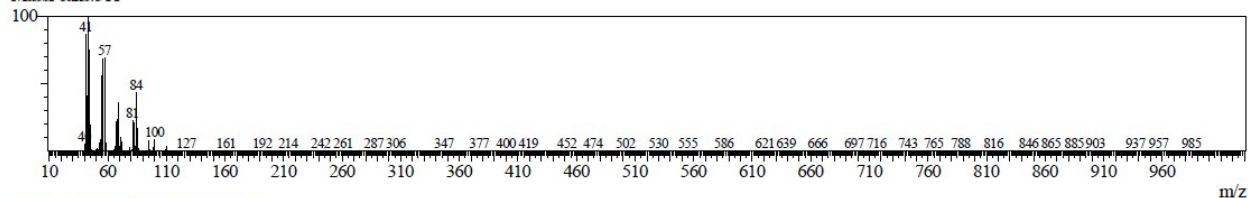

Line#2 R Time:6.725(Scan#:448)

MassPeaks:537

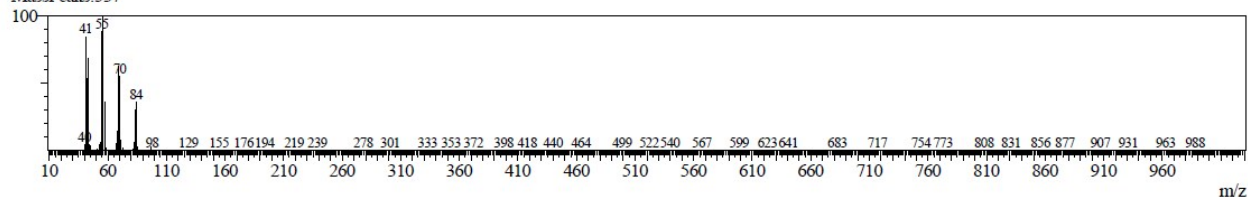

Note that:

These reference mass spectra are indicative of chemical function of homologous chains.

Relative order of retention times in GC column of low polarity depends on chemical function and carbon number of chains: the  $\text{C}_{(n+2)}$ -alkane is near the  $\text{C}_n$ -aldehyde which is between the  $\text{C}_{(n-2)}$ - and  $\text{C}_n$ -alcohols.

## S5-2 GC/MS analysis of fatty alcohols.

Analyzed : 18/06/2014 21:35:54  
 Sample Name : TC517  
 Data File : F:\TC517.qgd  
 Org Data File : C:\GCMSolution\Data\EI\CD\TC517.qgd  
 Method File : C:\GCMSolution\Data\EI\CD\methode 25032014-thomas.qgm

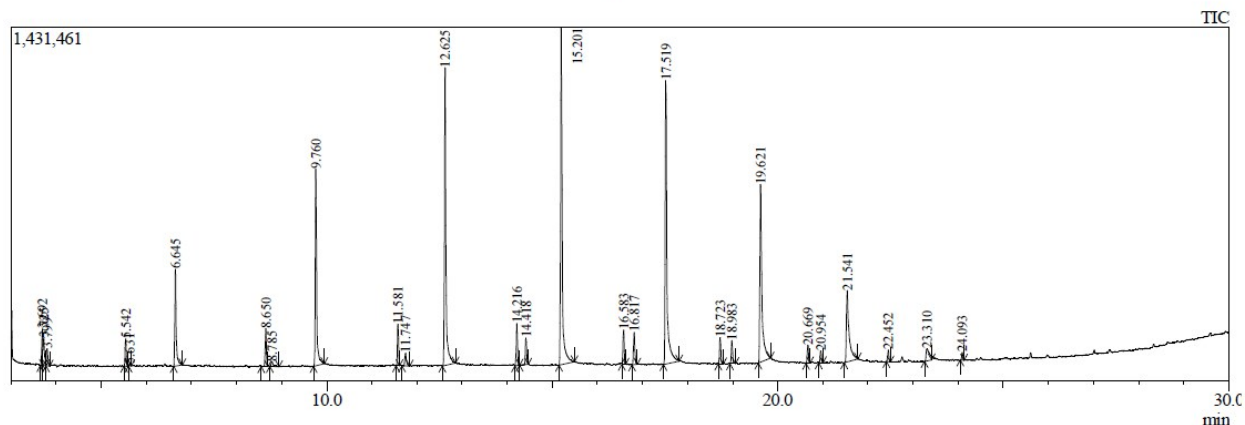

| Peak# | R.Time | Area     | Area%  | Height  | Height% |
|-------|--------|----------|--------|---------|---------|
| 1     | 3.692  | 230393   | 1.21   | 148022  | 1.91    |
| 2     | 3.725  | 220901   | 1.16   | 113467  | 1.46    |
| 3     | 3.799  | 163532   | 0.86   | 70680   | 0.91    |
| 4     | 5.542  | 181760   | 0.96   | 109743  | 1.41    |
| 5     | 5.631  | 14862    | 0.08   | 8566    | 0.11    |
| 6     | 6.645  | 858119   | 4.51   | 391606  | 5.05    |
| 7     | 8.650  | 280083   | 1.47   | 154703  | 1.99    |
| 8     | 8.785  | 69295    | 0.36   | 19476   | 0.25    |
| 9     | 9.760  | 1748920  | 9.19   | 797867  | 10.28   |
| 10    | 11.581 | 303098   | 1.59   | 169515  | 2.19    |
| 11    | 11.747 | 125786   | 0.66   | 51882   | 0.67    |
| 12    | 12.625 | 2790687  | 14.67  | 1206221 | 15.55   |
| 13    | 14.216 | 307551   | 1.62   | 170240  | 2.19    |
| 14    | 14.418 | 205150   | 1.08   | 106642  | 1.37    |
| 15    | 15.201 | 3341729  | 17.56  | 1365980 | 17.61   |
| 16    | 16.583 | 251950   | 1.32   | 139232  | 1.79    |
| 17    | 16.817 | 260421   | 1.37   | 129737  | 1.67    |
| 18    | 17.519 | 3191857  | 16.77  | 1148159 | 14.80   |
| 19    | 18.723 | 212923   | 1.12   | 107072  | 1.38    |
| 20    | 18.983 | 191482   | 1.01   | 94267   | 1.22    |
| 21    | 19.621 | 2240504  | 11.77  | 719483  | 9.27    |
| 22    | 20.669 | 137190   | 0.72   | 72143   | 0.93    |
| 23    | 20.954 | 98777    | 0.52   | 46940   | 0.61    |
| 24    | 21.541 | 1195687  | 6.28   | 288818  | 3.72    |
| 25    | 22.452 | 92173    | 0.48   | 47270   | 0.61    |
| 26    | 23.310 | 257652   | 1.35   | 49936   | 0.64    |
| 27    | 24.093 | 55780    | 0.29   | 29976   | 0.39    |
|       |        | 19028262 | 100.00 | 7757643 | 100.00  |

Line# 1 R.Time: 3.692(Scan#: 84)

MassPeaks: 477

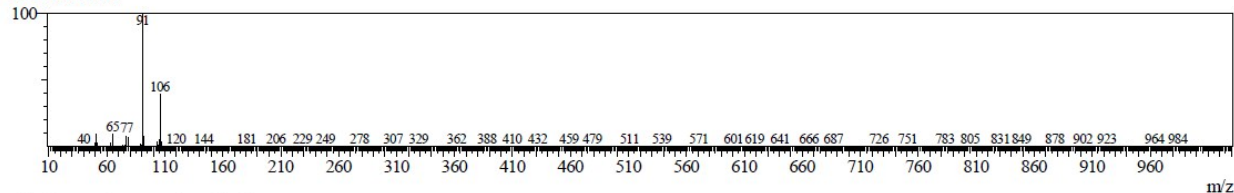

Line# 2 R.Time: 3.725(Scan#: 88)

MassPeaks: 471

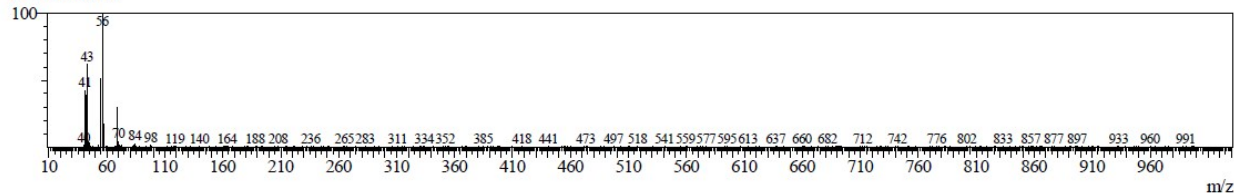

Line# 3 R.Time: 3.800(Scan#: 97)  
MassPeaks: 530

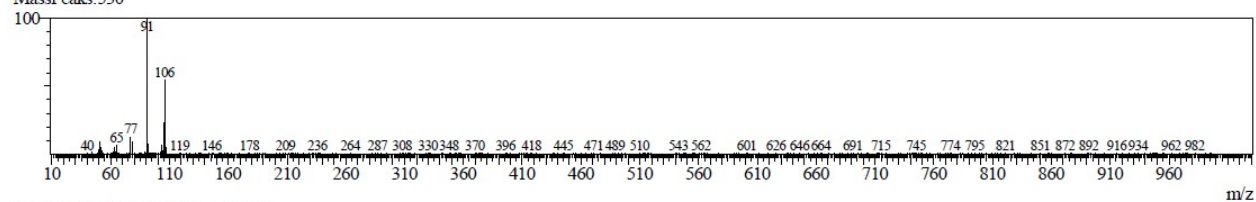

Line# 4 R.Time: 5.542(Scan#: 306)  
MassPeaks: 482

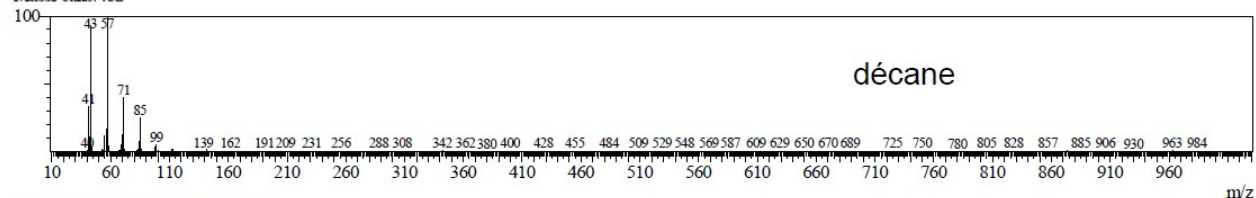

Line# 5 R.Time: 5.633(Scan#: 317)  
MassPeaks: 472

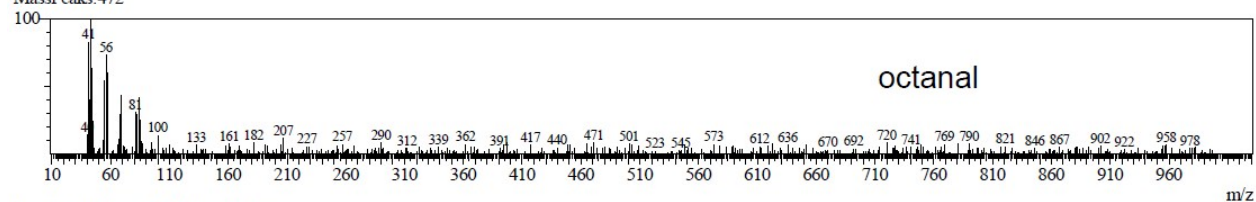

Line# 6 R.Time: 6.642(Scan#: 438)  
MassPeaks: 507

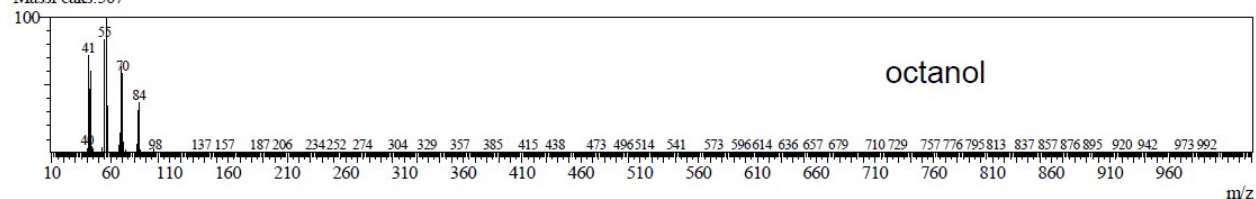

Line# 7 R.Time: 8.650(Scan#: 679)  
MassPeaks: 486

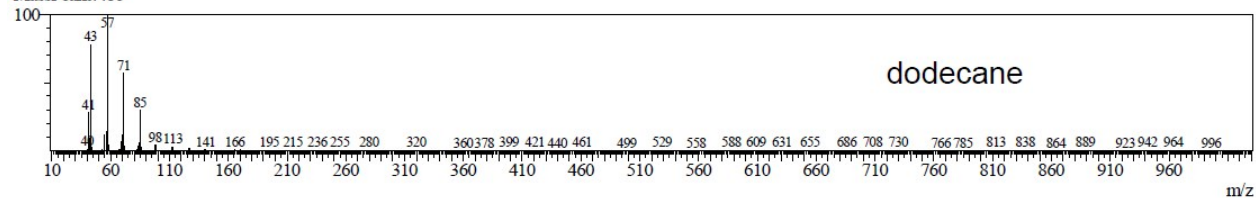

Line# 8 R.Time: 8.783(Scan#: 695)  
MassPeaks: 499

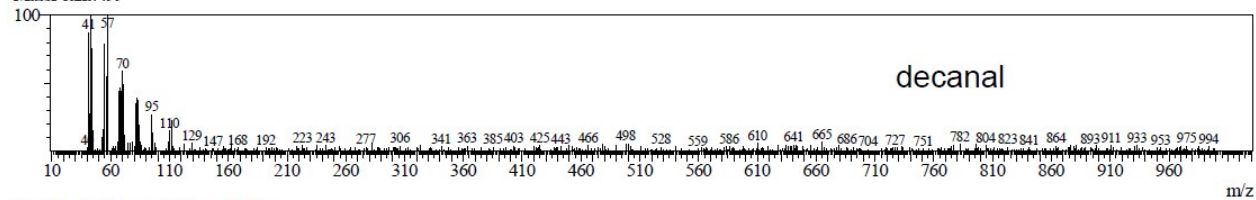

Line# 9 R.Time: 9.758(Scan#: 812)  
MassPeaks: 497

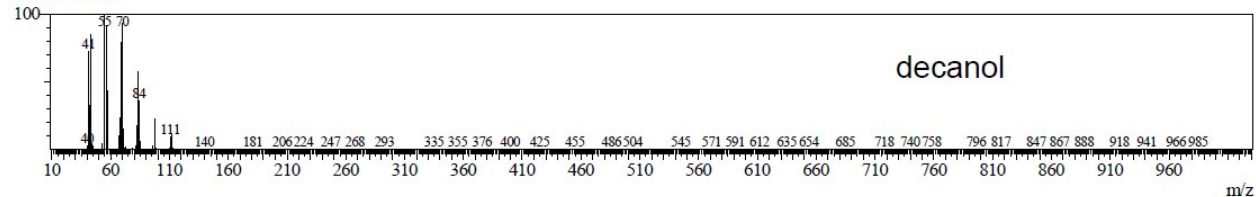

Line# 10 R.Time:11.583(Scan#:1031)  
MassPeaks:491

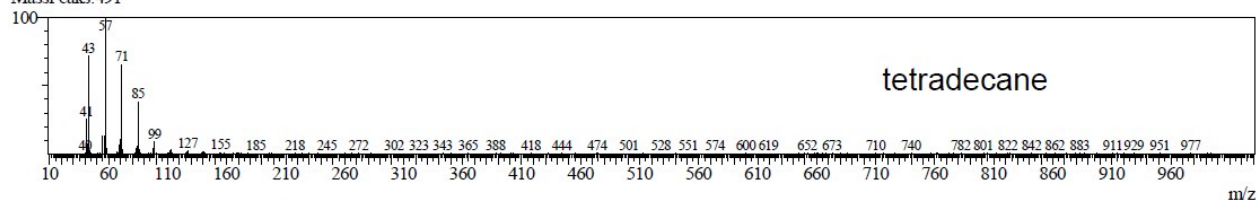

Line# 11 R.Time:11.750(Scan#:1051)  
MassPeaks:469

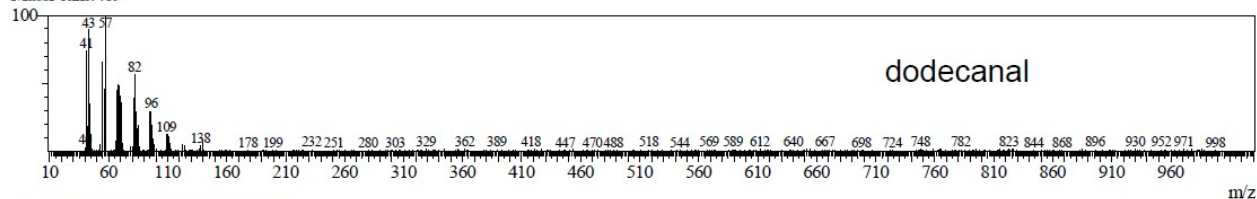

Line# 12 R.Time:12.625(Scan#:1156)  
MassPeaks:515

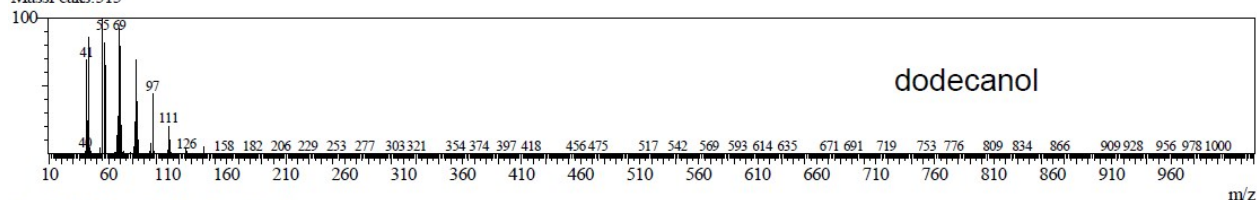

Line# 13 R.Time:14.217(Scan#:1347)  
MassPeaks:488

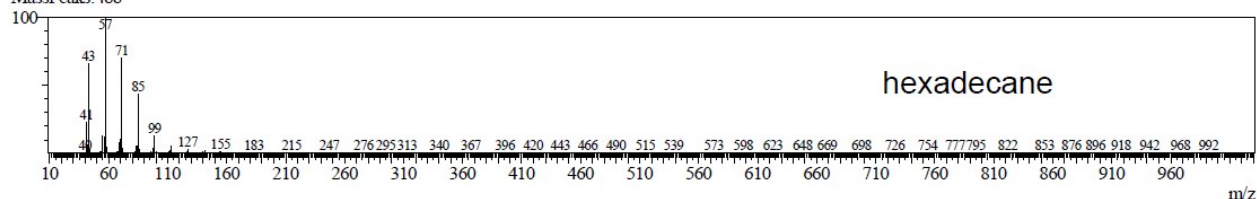

Line# 14 R.Time:14.417(Scan#:1371)  
MassPeaks:510

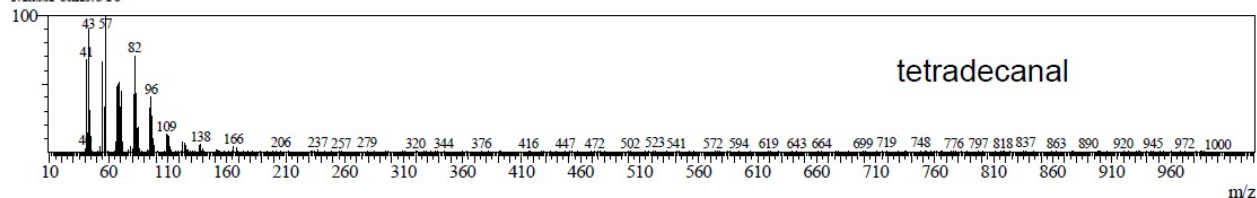

Line# 15 R.Time:15.200(Scan#:1465)  
MassPeaks:511

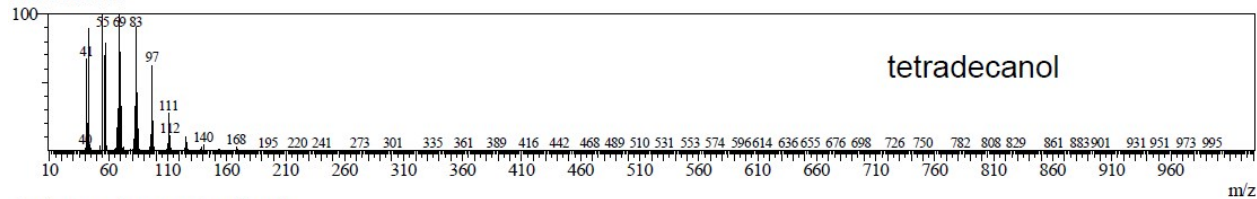

Line# 16 R.Time:16.583(Scan#:1631)  
MassPeaks:489

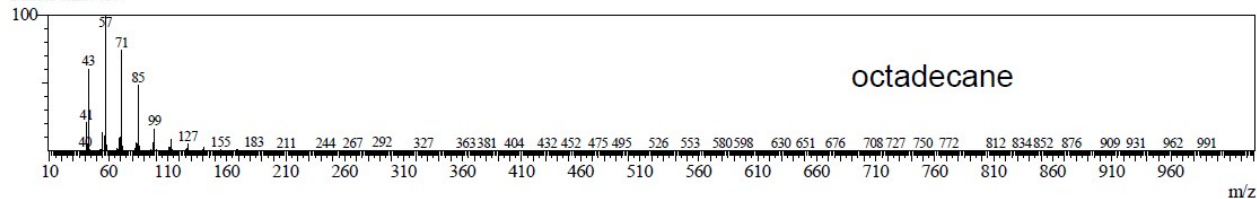



Line#:17 R.Time:16.817(Scan#:1659)  
MassPeaks:519

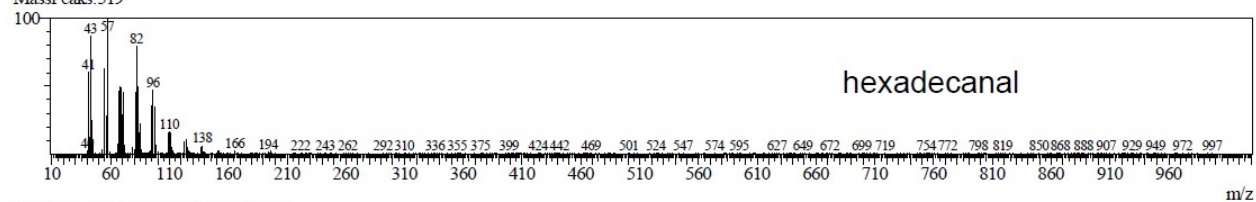

Line#:18 R.Time:17.517(Scan#:1743)  
MassPeaks:514

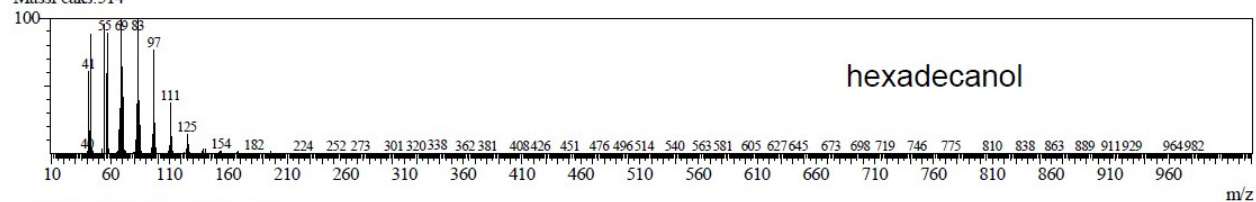

Line#:19 R.Time:18.725(Scan#:1888)  
MassPeaks:514

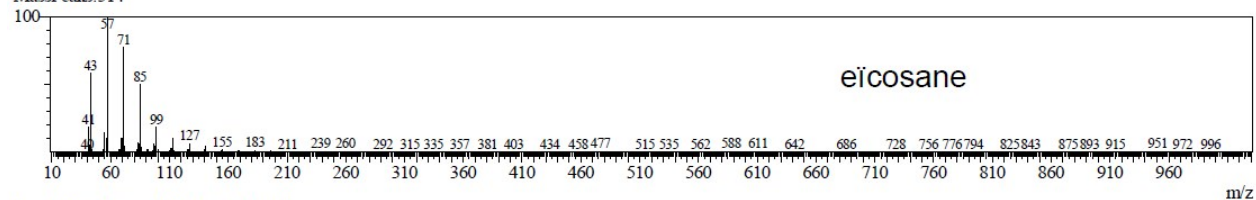

Line#:20 R.Time:18.983(Scan#:1919)  
MassPeaks:517

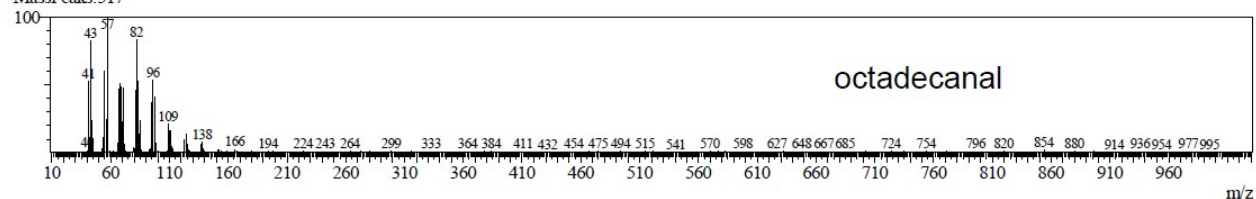

Line#:21 R.Time:19.617(Scan#:1995)  
MassPeaks:527

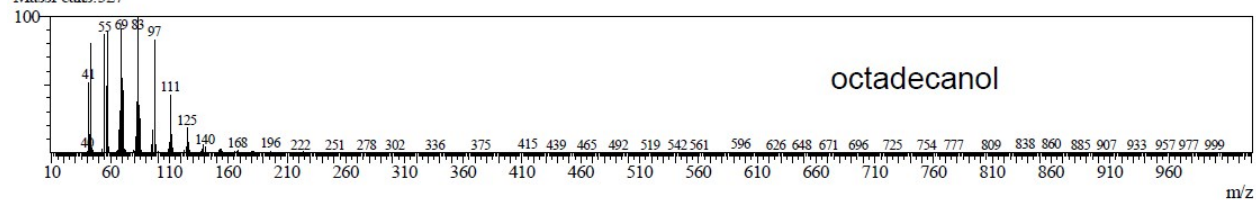

Line#:22 R.Time:20.667(Scan#:2121)  
MassPeaks:523

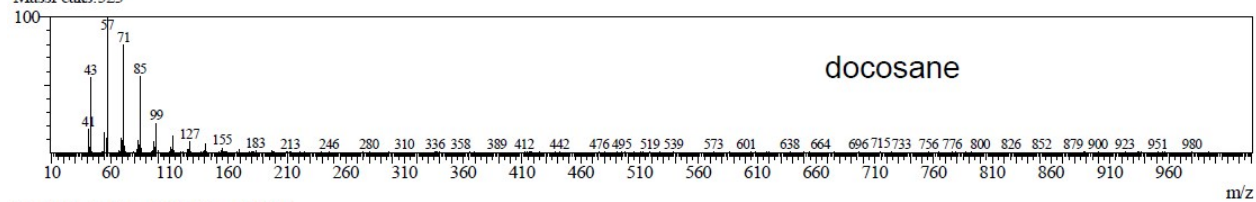

Line#:23 R.Time:20.958(Scan#:2156)  
MassPeaks:494

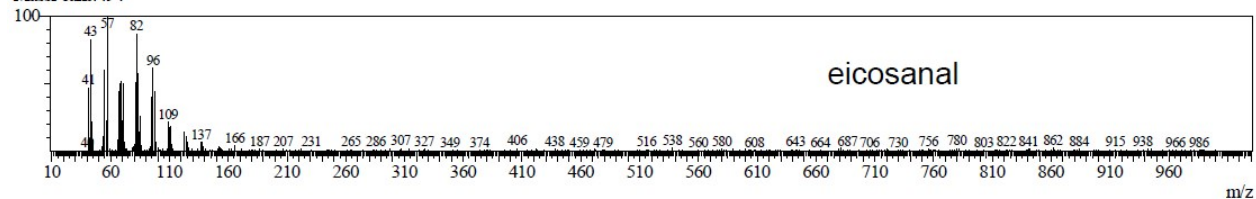

Line#:24 R.Time:21.542(Scan#:2226)

MassPeaks:515

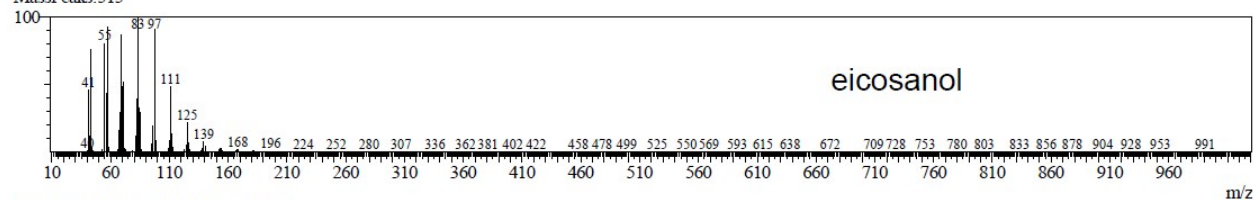

Line#:25 R.Time:22.450(Scan#:2335)

MassPeaks:475

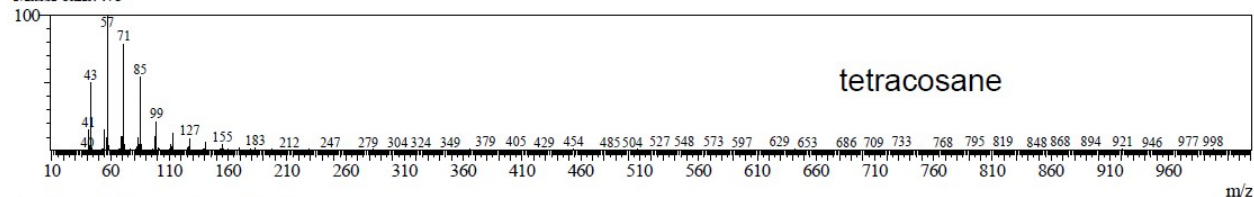

Line#:26 R.Time:23.308(Scan#:2438)

MassPeaks:504

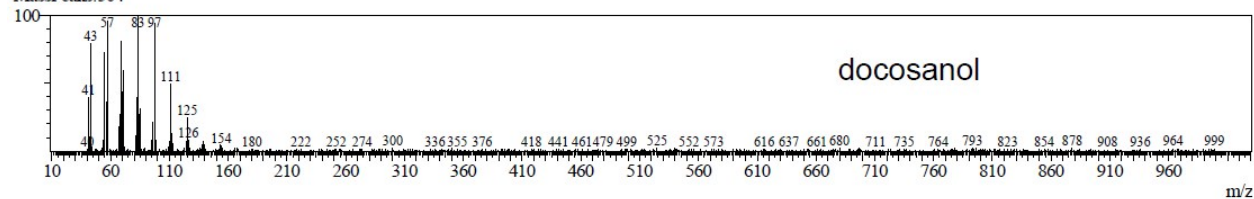

Line#:27 R.Time:24.092(Scan#:2532)

MassPeaks:490

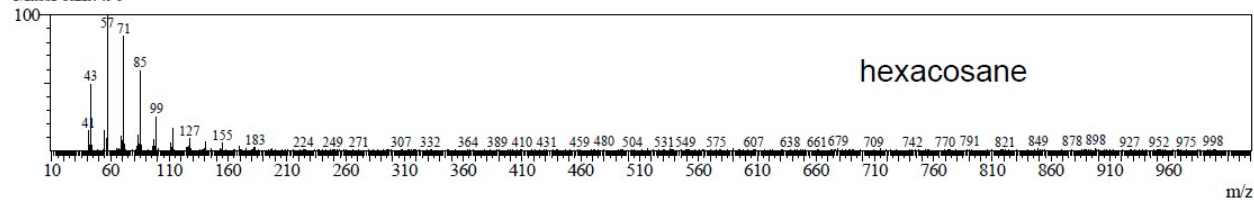

Note that:

To protect the sensitive parts of the GC/MS device, the analysis presented here was performed with a sample from a dedicated experiment with a low Mn targeted at C14.

S5-3 GC/MS analysis of *in situ* prepared (n-C<sub>18</sub>H<sub>37</sub>O)<sub>2</sub>Mg.

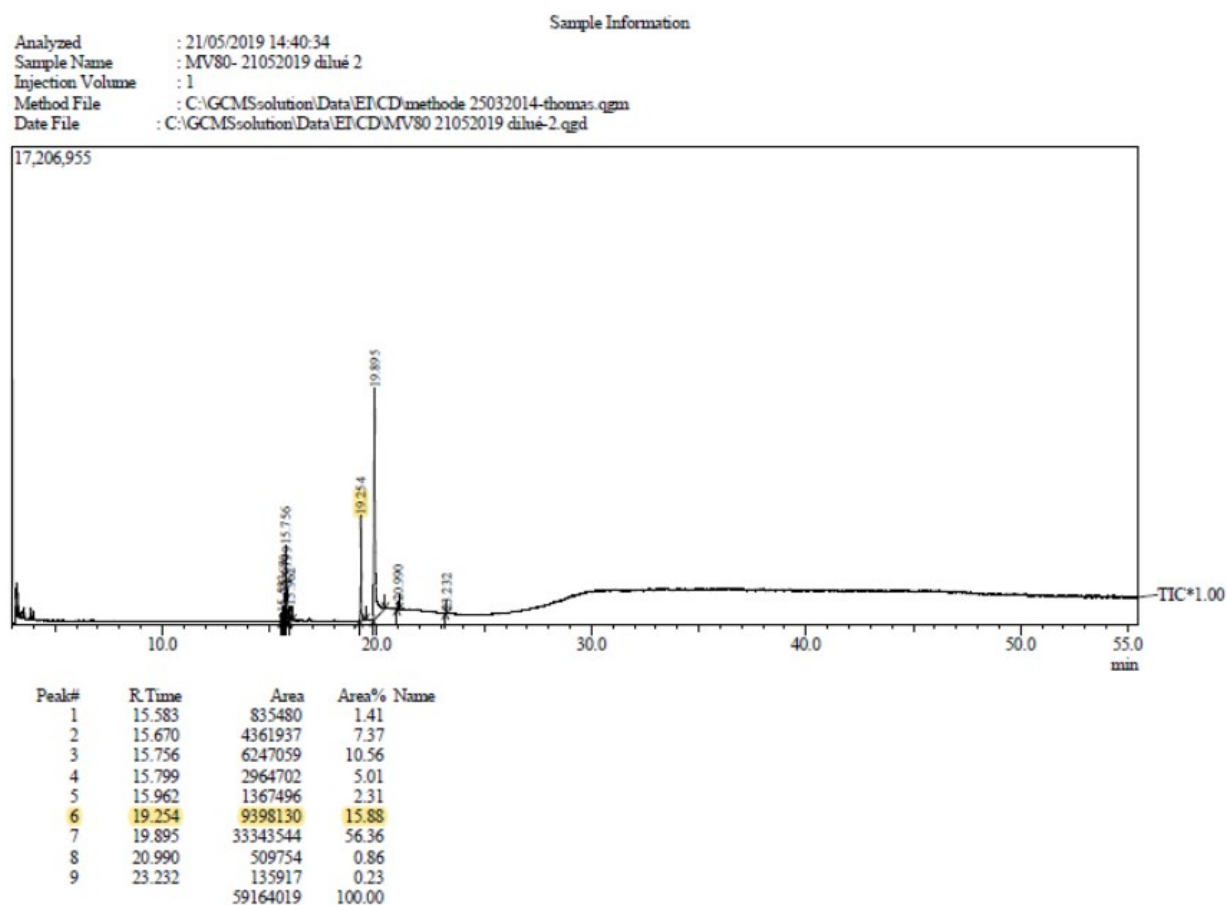

S5-3 (continuing)

GC/MS analysis of *in situ* prepared (n-C<sub>18</sub>H<sub>37</sub>O)<sub>2</sub>Mg.

<< Target >>

Line# 6 R.Time: 19.250 (Scan#: 1951) MassPeaks: 543

RawMode: Averaged 19.242-19.258 (1950-1952) BasePeak: 82.10 (278919)

BG Mode: Calc. from Peak Group 1 - Event 1

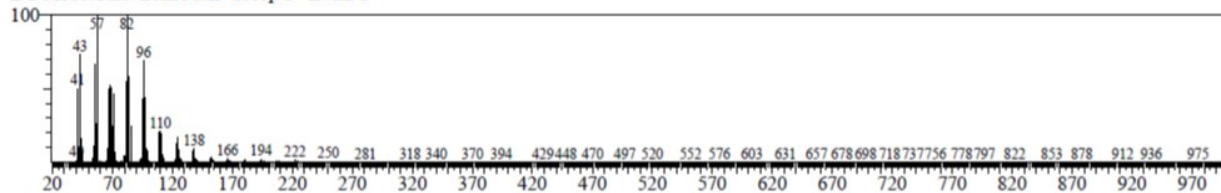

Hit# 1 Entry: 22614 Library: NIST08s.LIB

SI: 95 Formula: C<sub>18</sub>H<sub>36</sub>O CAS: 638-66-4 MolWeight: 268 RetIndex: 1999

CompName: Octadecanal \$\$ Stearaldehyde \$\$ Octadecyl aldehyde \$\$ Stearyl aldehyde \$\$ n-Octadecanal \$\$

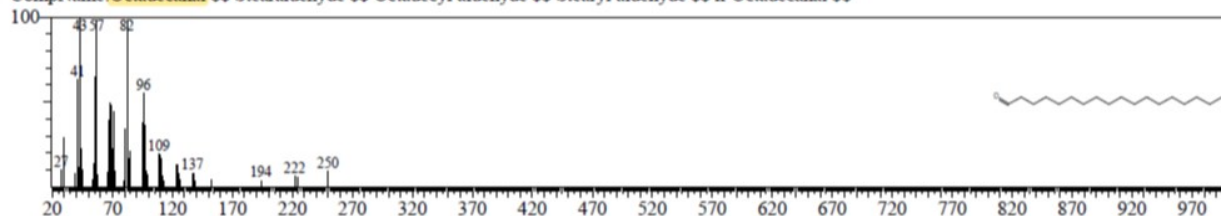

Hit# 2 Entry: 20690 Library: NIST08s.LIB

SI: 95 Formula: C<sub>16</sub>H<sub>32</sub>O CAS: 629-80-1 MolWeight: 240 RetIndex: 1800

CompName: Hexadecanal \$\$ Palmitaldehyde \$\$

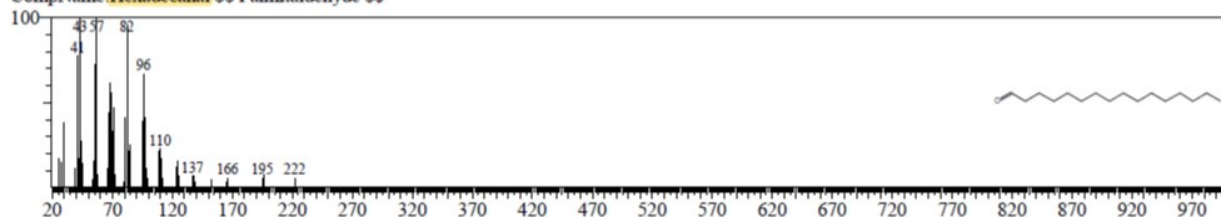

Hit# 3 Entry: 22613 Library: NIST08s.LIB

SI: 94 Formula: C<sub>18</sub>H<sub>36</sub>O CAS: 638-66-4 MolWeight: 268 RetIndex: 1999

CompName: Octadecanal \$\$ Stearaldehyde \$\$ Octadecyl aldehyde \$\$ Stearyl aldehyde \$\$ n-Octadecanal \$\$

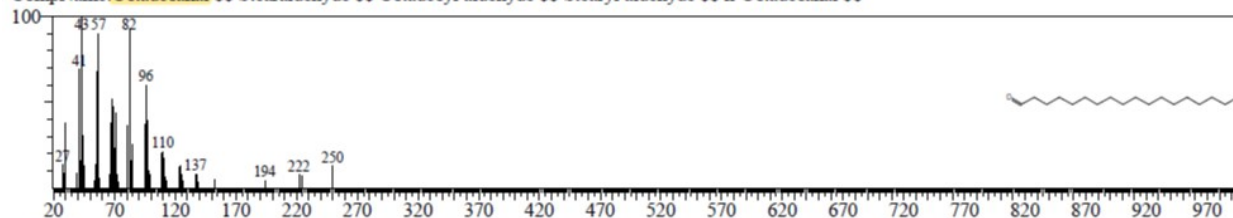

Hit# 4 Entry: 60326 Library: NIST08s.LIB

SI: 94 Formula: C<sub>15</sub>H<sub>30</sub>O CAS: 2765-11-9 MolWeight: 226 RetIndex: 1701

CompName: Pentadecanal-

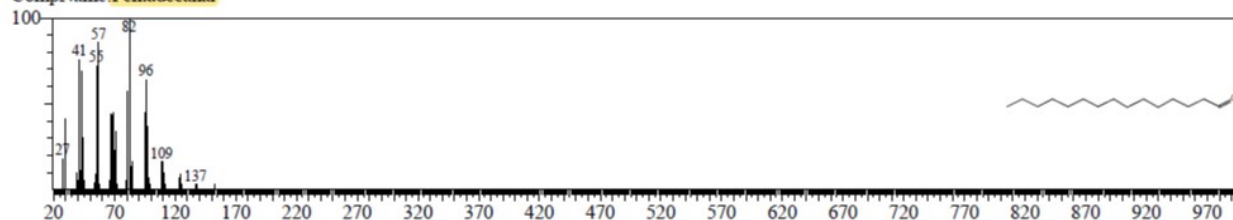



S5-4 I-R spectra of fatty alcohols: Entry 5, Table 3

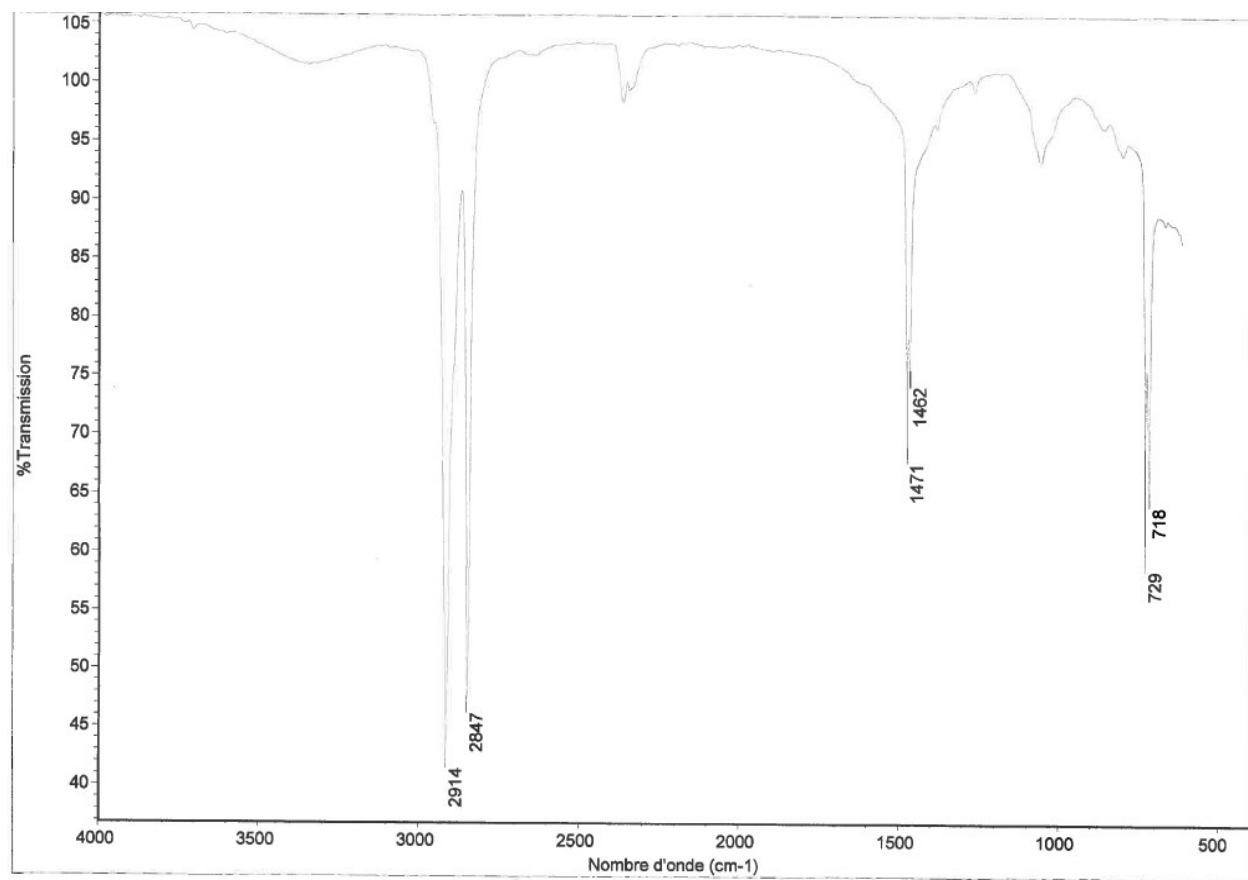

Note that:

No signal is recorded around 1700 cm<sup>-1</sup>.
